# Supplementary material for: A machine-learned superionic, Li-metal-compatible, and cost-effective halide electrolyte for all-solid-state Li metal batteries
Source: Research Square preprint supplement (doi:10.21203/rs.3.rs-8526688/v1), 2026-02-11
Supplement: Supplementary file 1 [file 165505d45de40df34dc45829.docx]

**Supplementary** **materials for**

**A machine-learned superionic, Li-metal-compatible, and cost-effective halide electrolyte for all-solid-state Li metal batteries**

*Hong Liu1,2,9, Haoyu Yin3,9, Xiang Qi4,9, Yaoyu Ren1,*, Meng Wu4, Yang Li4, Haocheng Yuan1, Dengfeng Yu1, Fangyi Chen1, Guangshuo Liao1, Mingxue Tang5,* *Yujun Zhang6,* *Shangming He7,8, Jianrong Zeng7,8, Xiaonan Wang3,*, Li-Zhen Fan4, Yang Shen1, Ce-Wen Nan1,**

*1School of Materials Science and Engineering, State Key Laboratory of New Ceramic Materials, Tsinghua University, Beijing 100084, China*

*2State Key Laboratory of New Ceramic Materials, Beijing Tsinghua Institute for Frontier Interdisciplinary Innovation, Beijing 102202, China*

*3State Key Laboratory of Chemical Engineering and Low-Carbon Technology, Department of Chemical Engineering, Tsinghua University, Beijing 100084, China*

*4Institute for Advanced Materials and Technologies, University of Science and Technology Beijing, Beijing 100083, China*

*5Center for High Pressure Science and Technology Advanced Research, Beijing 100193, China*

*6Institute of High Energy Physics, Chinese Academy of Sciences, Beijing 100049, China*

*7Shanghai Institute of Applied Physics, Chinese Academy of Sciences, Shanghai 201800, China*

*8Institute of High Energy Physics, Chinese Academy of Sciences, Beijing 100049, China*

*9These authors contributed equally to this work*

*Email: renyaoyu@tsinghua.edu.cn; wangxiaonan@tsinghua.edu.cn; cwnan@tsinghua.edu.cn

***This PDF file includes: Methods, Supplementary Figures 1 to 45, and Supplementary Tables 1 to 11****.*

***Contents***

[1. Methods 9](#_Toc217638241)

[1.1 Materials synthesis 9](#_Toc217638242)

[1.2 Material characterizations 9](#_Toc217638243)

[1.3 Electrochemical measurements 10](#_Toc217638244)

[1.4 Mold-type ASSLMBs assembly and measurements 10](#_Toc217638245)

[1.5 Pouch-type ASSLMBs assembly and measurements 11](#_Toc217638246)

[1.6 Humidity tolerance test 11](#_Toc217638247)

[1.7 Density functional theory calculations 11](#_Toc217638248)

[1.8 Ab initio molecular dynamics simulations 12](#_Toc217638249)

[1.9 Nudged elastic band calculations 12](#_Toc217638250)

[1.10 Site ordering of LZC-10TF 13](#_Toc217638251)

[1.11 Charge density difference and electron localization function calculations 13](#_Toc217638252)

[1.12 Density of state calculations 14](#_Toc217638253)

[1.13 Bond-valence site energy calculations 14](#_Toc217638254)

[2. Supplementary Figures 15](#_Toc217638255)

[3. Supplementary Tables 66](#_Toc217638256)

[4. References for Supplementary Materials 82](#_Toc217638257)

***List of Supplementary Figures***

[Supplementary Fig. 1. a,b Nyquist plots of the LZC (a) and 450 °C-annealed LZC (b). c Arrhenius plots of the LZC and 450 °C-annealed LZC. d XRD patterns of the LZC and 450 °C-annealed](#_Toc212046303) [LZC.](#_Toc212046303) [15](#_Toc212046303)

Supplementary Fig. 2 | a A top view of the ZrCl6 lattice along the *c*-axis is presented, with the unit cell outlined by the lines. The structure features intrinsically preexisting channels along the *c*-axis, with an inner diameter of 5.1 Å. b A side view of the ZrCl6 lattice reveals the Zr polyhedra arranged in an ABA stacking configuration, providing sufficient interlayer space for in-plane Li⁺ migration. The presence of Li ions within the lattice suggests migration both along the c-axis and in the plane. [17](#_Toc212046303)

Supplementary Fig. 3 | a,b Plots of the MSD along each direction for LZC at varying temperatures—600 K (lowest) and 1100 K (highest)—reveal that the *c*-axis diffusion channel plays a predominant role in the overall diffusion process. c,d The structures of LZC after 260 ps of AIMD simulations at 600 K and 1100 K show that the positions of Zr remain stable, demonstrating the stability of the [ZrCl6] framework at high temperatures. 18

[Supplementary Fig. 4. a Arrhenius plot of Li+ diffusivity in the LZC lattice from AIMD simulations at 1,100, 1,000, 900, 800, 700, and 600 K. The yellow line represents the linear fitting of the Arrhenius plots of Li+ conductivity from AIMD simulations, which is used to extrapolate the Li+ conductivity at 300 K to be 6.4630 ± 3.8842 mS cm⁻1. b Li+ migration paths in the LZC lattice and corresponding energy barriers with different interlayer distances. The path 1 (red) and path 2 (blue) represent Li+ migration in *a-b* plane, while path 3 (green) is the transport of Li+ along the c axis.. 19](#_Toc212046303)

Supplementary Fig. 5 | a,b Potential doping sites for LZC (a) and potential crystal structure (b). LZC is a kind of 1D channel material, with the space group of . There are only 6i sites available for anion substitution, while there are 1a and 2d sites suitable for cation substitution. [20](file:///E:\投稿工作\博后期间发表工作\5.%20第五篇文章准备\20251225\Supplementary%20materials-20251225.docx#_Toc212046303)

[Supplementary Fig. 6. The heatmaps present the performance rankings of all doping combinations.](#_Toc212046303) [21](#_Toc212046303)

[Supplementary Fig. 7. a XRD patterns for a series of Li](#_Toc212046303)[2](#_Toc212046303)[Zr](#_Toc212046303)[1-x](#_Toc212046303)[Al](#_Toc212046303)[x](#_Toc212046303)[Cl](#_Toc212046303)[6-3x](#_Toc212046303)[F](#_Toc212046303)[3x](#_Toc212046303) [(denoted as LZC-xAF, where x% is the AlF](#_Toc212046303)[3](#_Toc212046303) [substitution percentage, x = 0, 10, 20, 30, 40). b Arrhenius plots of the prepared LZC-xAF electrolytes (x = 0, 10, 20, 30, 40) c Ionic conductivities and activation energy for the prepared LZC-xAF electrolytes. 22](#_Toc212046303)

[Supplementary Fig. 8. a XRD patterns for a series of Li2Zr1-xPxCl6-3xF4x (denoted as LZC-xPF, where x% is the P substitution percentage, x = 0, 10, 20, 30, 40). b Arrhenius plots of the prepared LZC-xPF electrolytes (x = 0, 10, 20, 30, 40). c Ionic conductivities and activation energy for the prepared LZC-xPF electrolytes. 23](#_Toc212046303)

[Supplementary Fig. 9. a-e SEM images of the prepared LZC (a), LZC-10TF (b), LZC-20TF (c), LZC-30TF (d), and LZC-40TF (e) electrolytes. 24](#_Toc212046303)

[Supplementary Fig. 10. Magnified XRD patterns of the LZC-xTF electrolytes (x = 0, 10, 20, 30, 40) in the 2θ range from 30° to 60°. 25](#_Toc212046303)

[Supplementary Fig. 11. Raman spectra of the LZC-xTF, TiF3, LiCl, and ZrCl4. 26](#_Toc212046303)

[Supplementary Fig. 12. SEM images of the corresponding EDS mapping of the prepared LZC-10TF. 27](#_Toc212046303)

Supplementary Fig. 13. [Nyquist plots of the prepared LZC-xTF (x = 0, 10, 20, 30, 40). 28](#_Toc212046303)

[Supplementary Fig. 14. Ionic conductivity comparison of the prepared LZC-10TF with previously advanced HSEs. 29](#_Toc212046303)

[Supplementary Fig. 15. a,b Rietveld refinement of the LZC-10TF (a) and LZC (b). 30](#_Toc212046303)

[Supplementary Fig. 16. Normalized XANES spectra of Ti K-edge for TiF3 and LZC-10TF. 31](#_Toc212046303)

[Supplementary Fig. 17. a WT for the k3-weighted Zr K-edge EXAFS signals of the Zr foil. b,c WT for the k3-weighted Ti K-edge EXAFS signals of the Ti foil (b) and TiF3 (c). 32](#_Toc212046303)

[Supplementary Fig. 18. a,b Ti K-edge EXAFS fitting curves at R space for TiF3 (a) and LZC-10TF (b). 33](#_Toc212046303)

[Supplementary Fig. 19. a,b Zr K-edge EXAFS fitting curves at R space for LZC (a) and LZC-10TF (b). 34](#_Toc212046303)

[Supplementary Fig. 20. 7Li MAS NMR spectra of LZC and LZC-10TF. 35](#_Toc212046303)

[Supplementary Fig. 21. Normalized electrostatic energy of 25,764,480 Li-free configurations in the LZC-10TF supercell model is shown, with representative high-energy (upper) and low-energy (lower) structures. 36](#_Toc212046303)

[Supplementary Fig. 22. a,b Crystal structure of LZC (a) superimposed with Li⁺ probability density (b) indicated by yellow iso-surfaces, based on 20 ps AIMD simulations at 1100 K. c,d Crystal structure of LZC-10TF (c) superimposed with Li⁺ probability density (d), also marked by yellow iso-surfaces, from 20 ps AIMD simulations at 1100 K](#_Toc212046303). 37

[Supplementary Fig. 23. a,d The energy landscape of LZC (a) and LZC-10TF (d) calculated using the BVSE method is shown. b,c,e,f The energy isosurfaces and migration pathways for LZC (b,c) and LZC-10TF (e,f) are presented, which are consistent with the results obtained from CINEB calculations. 3](#_Toc212046303)8

[Supplementary Fig. 24. Comparison of bond lengths of Ti-Cl, Zr-Cl, Ti-F, and Zr-F. 39](#_Toc212046303)

[Supplementary Fig. 25. a-d 2D plot of the electron localization function (ELF) for LZC (a), LZC-30F (b), LZC-10T (c), LZC-10TF (d) in the (001) plane, with a fractional coordinate of 0.5 along the *c*-axis.](#_Toc212046303) 40

[Supplementary Fig. 26. a-d PDOS plots for Li⁺ and the nearby anions are shown: LZC (a), LZC-10T (b), LZC-30F (c), LZC-10TF (d). 4](#_Toc212046303)2

[Supplementary Fig. 27. DC polarization curves of LZC (a) and LZC-10TF (b) using a symmetric cell configuration with different voltage biases from 0.2 to 1 V. c The electronic conductivity comparison of LZC and LZC-10TF. 43](#_Toc212046303)

[Supplementary Fig. 28. aSchematic diagram of Li/LZC-xTF/LZC-xTF+VGCF cells. b,c LSV curves of Li/LZC/LZC+VGCF (b) and Li/LZC-10TF/LZC-10TF+VGCF (**c**) at 0.1 mV s−1. 44](#_Toc212046303)

[Supplementary Fig. 29. Galvanostatic cycling of Li/LZC/Li and Li/LZC-10TF/Li symmetric cells at the current density of 0.1 mA cm⁻2 for 0.1 mAh cm⁻2. 45](#_Toc212046303)

[Supplementary Fig. 30. a,b Nyquist plots of the Li/LZC/Li (a) and Li/LZC-10TF/Li (b) symmetric cells before and after 500 h cycling at 0.1 mA cm⁻2 for 0.1 mAh cm⁻2. 46](#_Toc212046303)

[Supplementary Fig. 31. a-c Galvanostatic cycling of Li/LZC-20TF/Li (a), Li/LZC-30TF/Li (b), and Li/LZC-40TF/Li (c) symmetric cells at the current density of 0.1 mA cm⁻2 for 0.1 mAh cm⁻2. 47](#_Toc212046303)

[Supplementary Fig. 32. Li 1s (a) and Zr 3d (b) XPS spectra of the pristine LZC HSE before and after 500 h cycling at 0.1 mA cm−2 for 0.1 mAh cm−2. 48](#_Toc212046303)

[Supplementary Fig. 33. a,b Zr 3d (a) and Li 1s (b) in-depth XPS spectra of the LZC-10TF HSE after 500 h cycling at 1.0 mA cm⁻2 for 1.0 mAh cm⁻2. 49](#_Toc212046303)

[Supplementary Fig. 34. a SEM image of the pristine Li metal surface. b, c SEM images of Li metal surface after 500 h cycling at 0.1 mA cm−2 for 0.1 mAh cm−2 in the Li/LZC/Li (b) and Li/LZC-10TF/Li (c) symmetric cells. 50](#_Toc212046303)

[Supplementary Fig. 35. a,b Typical cross-sectional SEM images and elemental analysis of the pristine (a) and cycled (b) LZC-10TF/Li interfaces in Li/LZC-10TF/Li symmetric cells. 51](#_Toc212046303)

[Supplementary Fig. 36. Compressibility of electrolytes. a,b Low (a) and high (b) magnification SEM images of LZC electrolyte pellets cold-pressed at 300 MPa pressure. c,d Low (c) and high (d) magnification SEM images of LZC-10TF electrolyte pellets cold-pressed at 300 MPa pressure. 52](#_Toc212046303)

[Supplementary Fig. 37. Schematic diagram of NCM811/LZC-10TF/Li ASSLMBs. 53](#_Toc212046303)

[Supplementary Fig. 38. Rate performance of the NCM811/LZC-10TF/Li cell (NCM811 loading: 8.9 mg cm⁻2, 25 ℃). 54](#_Toc212046303)

[Supplementary Fig. 39. Impedance plots of the NCM811/LZC-10TF/Li cell recorded at different cycles (NCM811 loading: 8.9 mg cm⁻2, 1.0 C, 25 ℃). 55](#_Toc212046303)

[Supplementary Fig. 40. a-e Li 1s (a), Zr 3d (b), Cl 2p (c), Ti 2p (d), and F 1s (e) XPS spectra of the NCM811/LZC-10TF composite cathode before and after cycling at 1.0 C for 1000 cycles. 56](#_Toc212046303)

[Supplementary Fig. 41. Conductivity of NCM811 composite cathode. a A current vs. time curve of the NCM811 composite cathode by DC polarization method with ionic blocking cells SS/NCM811 cathode/SS (SS refers to stainless steel) with a constant voltage of 400 mV. b Nyquist plot of the NCM811 composite cathode. 57](#_Toc212046303)

[Supplementary Fig. 42. a,b Typical cross-sectional SEM images and elemental analysis of the pristine (a) and cycled (b) NCM811 cathode/LZC-10TF electrolyte interfaces in NCM811/LZC-10TF/Li cells (NCM811 loading: 8.9 mg cm⁻2). 58](#_Toc212046303)

[Supplementary Fig. 43. Charge-discharge curves (a) and cycling performances of the high NCM811 loading (18.7 mg cm⁻2) NCM811/LZC-10TF/Li cell at 0.2 C and 25 ℃. 59](#_Toc212046303)

[Supplementary Fig. 44. a-c Optical images of the freestanding dry films: NCM811 cathode (a), LZC-10TF electrolyte (b), and Li anode (c). d,e images of the assembled dry-film based pouch cell with the configuration NCM811/LZC-10TF/Li before cycling. 60](#_Toc212046303)

[Supplementary Fig. 45. Humidity tolerance of LZC-xTF. a-e XRD patterns of LZC (a), LZC-10TF (b), LZC-20TF (c), LZC-30TF (d), and LZC-40TF (e) before and after being exposed to the atmosphere with 5% RH. 61](#_Toc212046303)

[Supplementary Fig. 46. Humidity tolerance of LZC-10TF. a,b Zr 3d (a) and Cl 2p (b) XPS of the LZC-10TF before and after being exposed to the atmosphere with 5% RH. c-e XANES of Zr K-edge (c), Ti K-edge (d), and Cl K-edge (e) of the LZC-10TF before and after being exposed to the atmosphere with 5% RH. f Arrhenius plots of the LZC-10TF before and after being exposed to the atmosphere with 5% RH. g Initial voltage profiles of NCM811/LZC-10TF/Li ASSLMBs with LZC-10TF before and after air exposure to 5% RH for 12 h. h Cycling performance of the NCM811/LZC-10TF/Li battery at 0.1C with LZC-10TF after air exposure (5% RH). 62](#_Toc212046303)

[Supplementary Fig. 47. Comprehensive comparative analysis of cost, ionic conductivity, and Li-metal stability (evaluated by cumulative plating capacity) between LZC-10TF and currently typical HSEs. 64](#_Toc212046303)

***List of Supplementary Tables***

[Supplementary Table 1. Comparison of the ionic conductivity of the prepared LZC-10TF electrolyte with previous HSEs. 66](#_Toc212046303)

[Supplementary Table 2. Rietveld refinement results from the XRD pattern of LZC-10TF. 69](#_Toc212046303)

[Supplementary Table 3. Rietveld refinement results from the XRD pattern of LZC. 70](#_Toc212046303)

[Supplementary Table 4. EXAFS data fitting results of the samples. 71](#_Toc212046303)

[Supplementary Table 5. EXAFS data fitting results of Zr K-edge for Zr foil, LZC, and LZC-10TF. 72](file:///E:\\投稿工作\\5.%20第五篇文章准备\\20251103\\Supplementary%20materials-20251103.docx" \l "_Toc212046303)

[Supplementary Table 6. Performance comparison of Li symmetric cells with HSEs. 73](file:///E:\投稿工作\5.%20第五篇文章准备\20251103\Supplementary%20materials-20251103.docx#_Toc212046303)

[Supplementary Table 7. Comparison of cathode active material loading and areal capacity in ASSLMBs using Li metal and HSEs. 75](file:///E:\投稿工作\5.%20第五篇文章准备\20251103\Supplementary%20materials-20251103.docx#_Toc212046303)

[Supplementary Table 8. Comparison of cathode active material loading and areal capacity in ASSLMBs using Li metal and sulfide electrolyte. 76](file:///E:\投稿工作\5.%20第五篇文章准备\20251103\Supplementary%20materials-20251103.docx#_Toc212046303)

Supplementary Table 9. Comparison of cathode active material loading and areal capacity in ASSLMBs using Li metal and oxide electrolyte. 78

[Supplementary Table 10. The cost of elements in HSEs and conventional cathode active materials. 80](file:///E:\投稿工作\5.%20第五篇文章准备\20251103\Supplementary%20materials-20251103.docx#_Toc212046303)

[Supplementary Table 11. Comprehensive comparative analysis of cost, ionic conductivity, and Li-metal stability (evaluated by cumulative plating capacity) between LZC-10TF and currently typical HSEs. 81](file:///E:\投稿工作\5.%20第五篇文章准备\20251103\Supplementary%20materials-20251103.docx#_Toc212046303)

**1. Methods**

**1.1 Materials synthesis**

LZC-xTF (0 ≤ x ≤ 40) halide solid electrolytes (HSEs) were synthesized via mechanochemical milling using stoichiometric amounts of ZrCl4 (99.9%, Aldrich), LiCl (99.9%, Alfa Aesar), and TiF3 (99.9%, Aldrich). All reagents were dried at 100 °C in a vacuum oven and subsequently handled in an Ar atmosphere within a glovebox. The precursors were initially mixed at 200 rpm for 3 h to ensure homogeneity, followed by high-energy milling at 1000 rpm for 10 h to produce LZC-xTF. LZC-xAF (0 ≤ x ≤ 40) and LZC-xPF (0 ≤ x ≤ 40) were synthesized using the procedure described above for LZC-xTF.

**1.2 Material characterizations**

X-ray diffraction (XRD) patterns of the synthesized materials were collected on a Rigaku D/MAX-RB diffractometer using Cu Kα radiation (λ = 1.54178 Å). To prevent exposure to air, the samples were encapsulated in polyimide film. The XRD Rietveld refinement was performed using GSAS-II. X-ray photoelectron spectroscopy (XPS) was recorded on a Thermo Fisher ESCALAB 250Xi spectrometer to analyze the chemical states of the materials. The morphology and elemental distribution were characterized using scanning electron microscopy (SEM, JSM-7001F, JEOL) at 5.0 kV, coupled with energy dispersive X-ray spectroscopy (EDS, Oxford). Solid-state nuclear magnetic resonance (ssNMR) measurements were conducted using a Bruker 400 MHz NMR spectrometer. The Larmor frequency for 7Li is 155.3 MHz. All samples were filled into 3.2 mm rotors, and all operations were performed within an argon-filled glovebox. The 7Li NMR spectra were recorded using a Hahn-echo pulse sequence with magic angle spinning (MAS) at 14 kHz. Chemical shifts were referenced to a 1M LiCl solution at 0 ppm. X-ray absorption spectroscopy (XAS) was performed at the BL13SSW beamline of the Shanghai Synchrotron Radiation Facility, with spectra acquired in fluorescence mode. The resulting data were analyzed using the Demeter software package.

**1.3 Electrochemical measurements**

Ionic conductivities of the synthesized materials were measured using electrochemical impedance spectroscopy (EIS) with a Solartron 1260+1287 workstation. Impedance spectra were recorded over the temperature range of 25 to 80 °C, using stainless-steel (SS) disks as blocking electrodes, and a frequency range of 106-0.1 Hz with an alternating current (AC) amplitude of 10 mV. Activation energies (*Ea*) for ionic conduction were derived from Arrhenius plots, correlating ionic conductivity with temperature. To assess electronic conductivity, direct current (DC) polarization experiments were conducted on symmetric SS cells at varying constant voltages (0.2-1 V, with 0.2 V steps) for 40 min each. Electrochemical stability was assessed through linear sweep voltammetry (LSV) using a CHI660B workstation. Measurements were conducted in a Li/HSE/HSE-VGCF (vapor-grown carbon fibers) cell configuration within a 0 to 5 V range (vs. Li/Li+) at a scan rate of 0.1 mV s⁻1. The mass ratio of HSEs to VGCF was maintained at 9:1, with an approximate hybrid mass loading of 10 mg. Critical current density and long-duration Li plating and stripping cycles at different current densities were performed on Li symmetric cells at 25 °C.

**1.4 Mold-type ASSLMBs assembly and measurements**

Single-crystal LiNi0.8Mn0.1Co0.1O2 (NCM811, Hefei Gotion High-Tech Co. Ltd.) was dried at 100 °C under vacuum for 12 h before use. For the cathode composite preparation, NCM811 (70 wt%), LZC-10TF (28 wt%), and VGCF (2 wt%) were mixed using a vortex mixer (Haimen Kylin-Bell Lab Instruments, QL-866) at 1500 rpm for 20 min. The assembly of all-solid-state Li metal batteries (ASSLMBs) followed this procedure: 80 mg of LZC-10TF powder was placed in a polytetrafluoroethylene (PTFE) tube (10 mm inner diameter) and compacted at 300 MPa. Composite cathode powders were then spread on one side of the LZC-10TF pellet and compressed at 400 MPa. A fresh Li metal foil (Φ 10 mm, thickness ~100 μm) adhered to an SS spacer was placed on the opposite side of the LZC-10TF pellet, completing the NCM811/LZC-10TF/Li full cell assembly. A 40 MPa pressure was externally applied throughout cycling to maintain optimal interfacial contact. Galvanostatic charge/discharge cycling was conducted within a voltage range of 2.8-4.3 V (vs. Li/Li+) for the NCM811 cell (1 C = 180 mA g⁻1). All cell assembly and evaluations were carried out in an argon-filled glovebox (H2O < 0.1 ppm, O2 < 0.1 ppm), with testing performed at 25 °C using a LAND CT2001A system (Wuhan Jinnuo Electronics, Ltd.).

**1.5 Pouch-type ASSLMBs assembly and measurements**

Pouch cell preparation procedures were conducted in an Ar-filled glovebox. Dry-film processing methods were used to fabricate NCM811 cathode and LZC-10TF electrolyte films. Mechanical mixing combined 99.5 wt% HSEs (or cathode composites in ‘Mold-type ASSLMBs assembly and measurements’ section) with 0.5 wt% PTFE in an agate mortar at 80 °C until forming a cohesive dough. Then, the dough was sandwiched between preheated (100 °C) SS foils and calendered to the target thickness, then tailored for cell assembly. Finally, NCM811 film, LZC-10TF film, and Li foil were stacked together to form pouch-type cells, sealed with aluminum bags under vacuum. An external pressure of 40 MPa was applied to the pouch cells during cycling at 25 °C to ensure stable interfacial contact across the cathode, SSE, and Li foil layers.

**1.6 Humidity tolerance test**

HSE pellets (150 mg) were placed in a sealed vessel (3600 cm3) containing air at various relative humidities. Following exposure, the humidity tolerance of the samples was assessed through XRD, EIS, XPS, and XAS analyses.

**1.7 Density functional theory calculations**

Density functional theory (DFT) computations were executed utilizing the Vienna Ab initio Simulation Package (VASP), with the projector augmented-wave (PAW) approach implemented. The exchange-correlation energy, EXC, was estimated using the Perdew-Burke-Ernzerhof (PBE) generalized gradient approximation. For all geometric optimizations and energy computations, a plane-wave cutoff energy of 500 eV was employed. A 2×2×2 k-point mesh was utilized for the calculations. Convergence criteria for energy and force were set at 10⁻5 eV and 0.02 eV Å⁻1, respectively.

**1.8 Ab initio molecular dynamics simulations**

The crystal structure of pristine Li2ZrCl6 (LZC) was derived from the Li3YCl6 structure, as reported previously1. We employed a 1×1×3 supercell variant of LZC, comprising 9 formula units and a total of 81 atoms, with lattice parameters a = 11.20927 Å, b = 11.20927 Å, and c = 18.11472 Å. Ab initio molecular dynamics simulations (AIMD) were performed on this structure using a reduced cutoff energy of 400 eV and a minimal Γ-centered 1×1×1 k-points mesh, necessitated by the high computational requirements. The simulations were initiated at 100 K and were gradually heated to the target temperatures (spanning from 600 to 1100 K) throughout 2 ps, followed by an equilibration phase of 260 ps with a time step of 2 fs throughout the AIMD. Temperature regulation was achieved with the Nose-Hoover thermostat, and velocity integration was conducted using the velocity-Verlet algorithm. The NVT ensemble was employed to characterize the equilibrium state.To reduce statistical fluctuations in diffusivity measurements, the relative standard deviation of diffusivity (RSD) was evaluated using an empirical formula proposed by He et al.2, which relies on the total mean-squared displacement (TMSD). AIMD simulations at various temperatures yielded TMSD values ranging from 7380 to 47700 Å2, with corresponding RSDs falling within a satisfactory range of 9%-18%. This indicates that the simulations captured an adequate number of diffusion events, and the sampling method was appropriate. For shorter AIMD runs, a 2×2×2 supercell was employed while ensuring that all other simulation parameters matched those of the extended simulations. The system was heated from 100 K to 1100 K over 2 ps, followed by a 20-ps period at a constant temperature of 1100 K. The Li+ diffusion coefficient was determined from the mean squared displacement (MSD) over time intervals, employing the Einstein relation, and the ionic conductivity was calculated using the Nernst-Einstein equation. The iso-surface values for all probability density maps were set at Pmax/50.

**1.9 Nudged elastic band calculations**

The energy profiles along the Li+ migration pathways in both pristine LZC and the LZC-10TF were determined using the climbing-image nudged elastic band (CINEB) method. For pristine LZC, three distinct pathways within a 1×1×3 supercell model were initially analyzed to characterize the energy landscape along the *a*, *b*, and *c* axes. This analysis was based on the probability density maps generated from AIMD simulations. To get a comparative assessment of the energy landscapes between pristine LZC and doped LZC-10TF, larger 2×2×2 supercell models were employed. In the CINEB calculations, the presence of excess electrons was counterbalanced by incorporating background charges, ensuring an accurate representation of the electronic environment within the supercells.

**1.10 Site ordering of LZC-10TF**

The synchrotron Rietveld refinement of XRD revealed that Ti occupies Zr sites, and F occupies Cl sites within the structure. To replicate the chemical formula observed experimentally (Li2.1Zr0.9Cl5.7Ti0.1F0.3), a 2×2×1 supercell was created, comprising 25 Li atoms, 11 Zr atoms, 69 Cl atoms, 1 Ti atom, and 3 F atoms. The Ti atom was substituted for Zr at the 1a and 2d crystallographic sites (with symmetry), while the F atoms replaced Cl at the 6i site (with symmetry). To maintain charge neutrality, additional Li atoms were placed at the 6h site (with symmetry). Considering the intricate nature of potential atomic configurations, a total of approximately 25,764,480 arrangements were possible. Initially, all unique, symmetry-independent structures were generated and then sorted based on their electrostatic energy via pymatgen. The structure with the lowest energy and the highest symmetry was chosen for further computational analysis.

**1.11 Charge density difference and electron localization function calculations**

To investigate the diminished energy barriers within the *a-b* plane, we examined the structural configurations at the extreme points of the migration trajectories. Calculations of charge density, charge density difference (CDD), and electron localization function (ELF) were performed to facilitate a visual representation of the electronic structure modifications. The rendering of CDD and ELF plots was aided by the VESTA software, which enabled a nuanced interpretation of the electronic transitions associated with the observed reduction in energy barriers along the migration pathways.

**1.12 Density of state calculations**

Density of states (DOS) calculations offer a critical understanding of the interactions between specific atoms, proving especially beneficial for probing conditions along ion migration pathways. We conducted these calculations using the structures obtained at the extreme points of these pathways. This approach enables a rigorous assessment of the atomic interactions that govern ion migration within the material.

**1.13 Bond-valence site energy calculations**

Bond-valence site energy (BVSE) analyses were carried out on the fractionally occupied structures resolved by XRD. These computations targeted both the unaltered LZC and the modified LZC-10TF to delineate their distinctive ion migration pathways. The BVSE calculations were performed using the softBV software. To facilitate detailed visualization and meticulous analysis, a resolution of 0.1 Å was chosen, and energy iso-surfaces were constructed to depict the potential energy landscapes traversed during ion migration.

**2. Supplementary Figures**


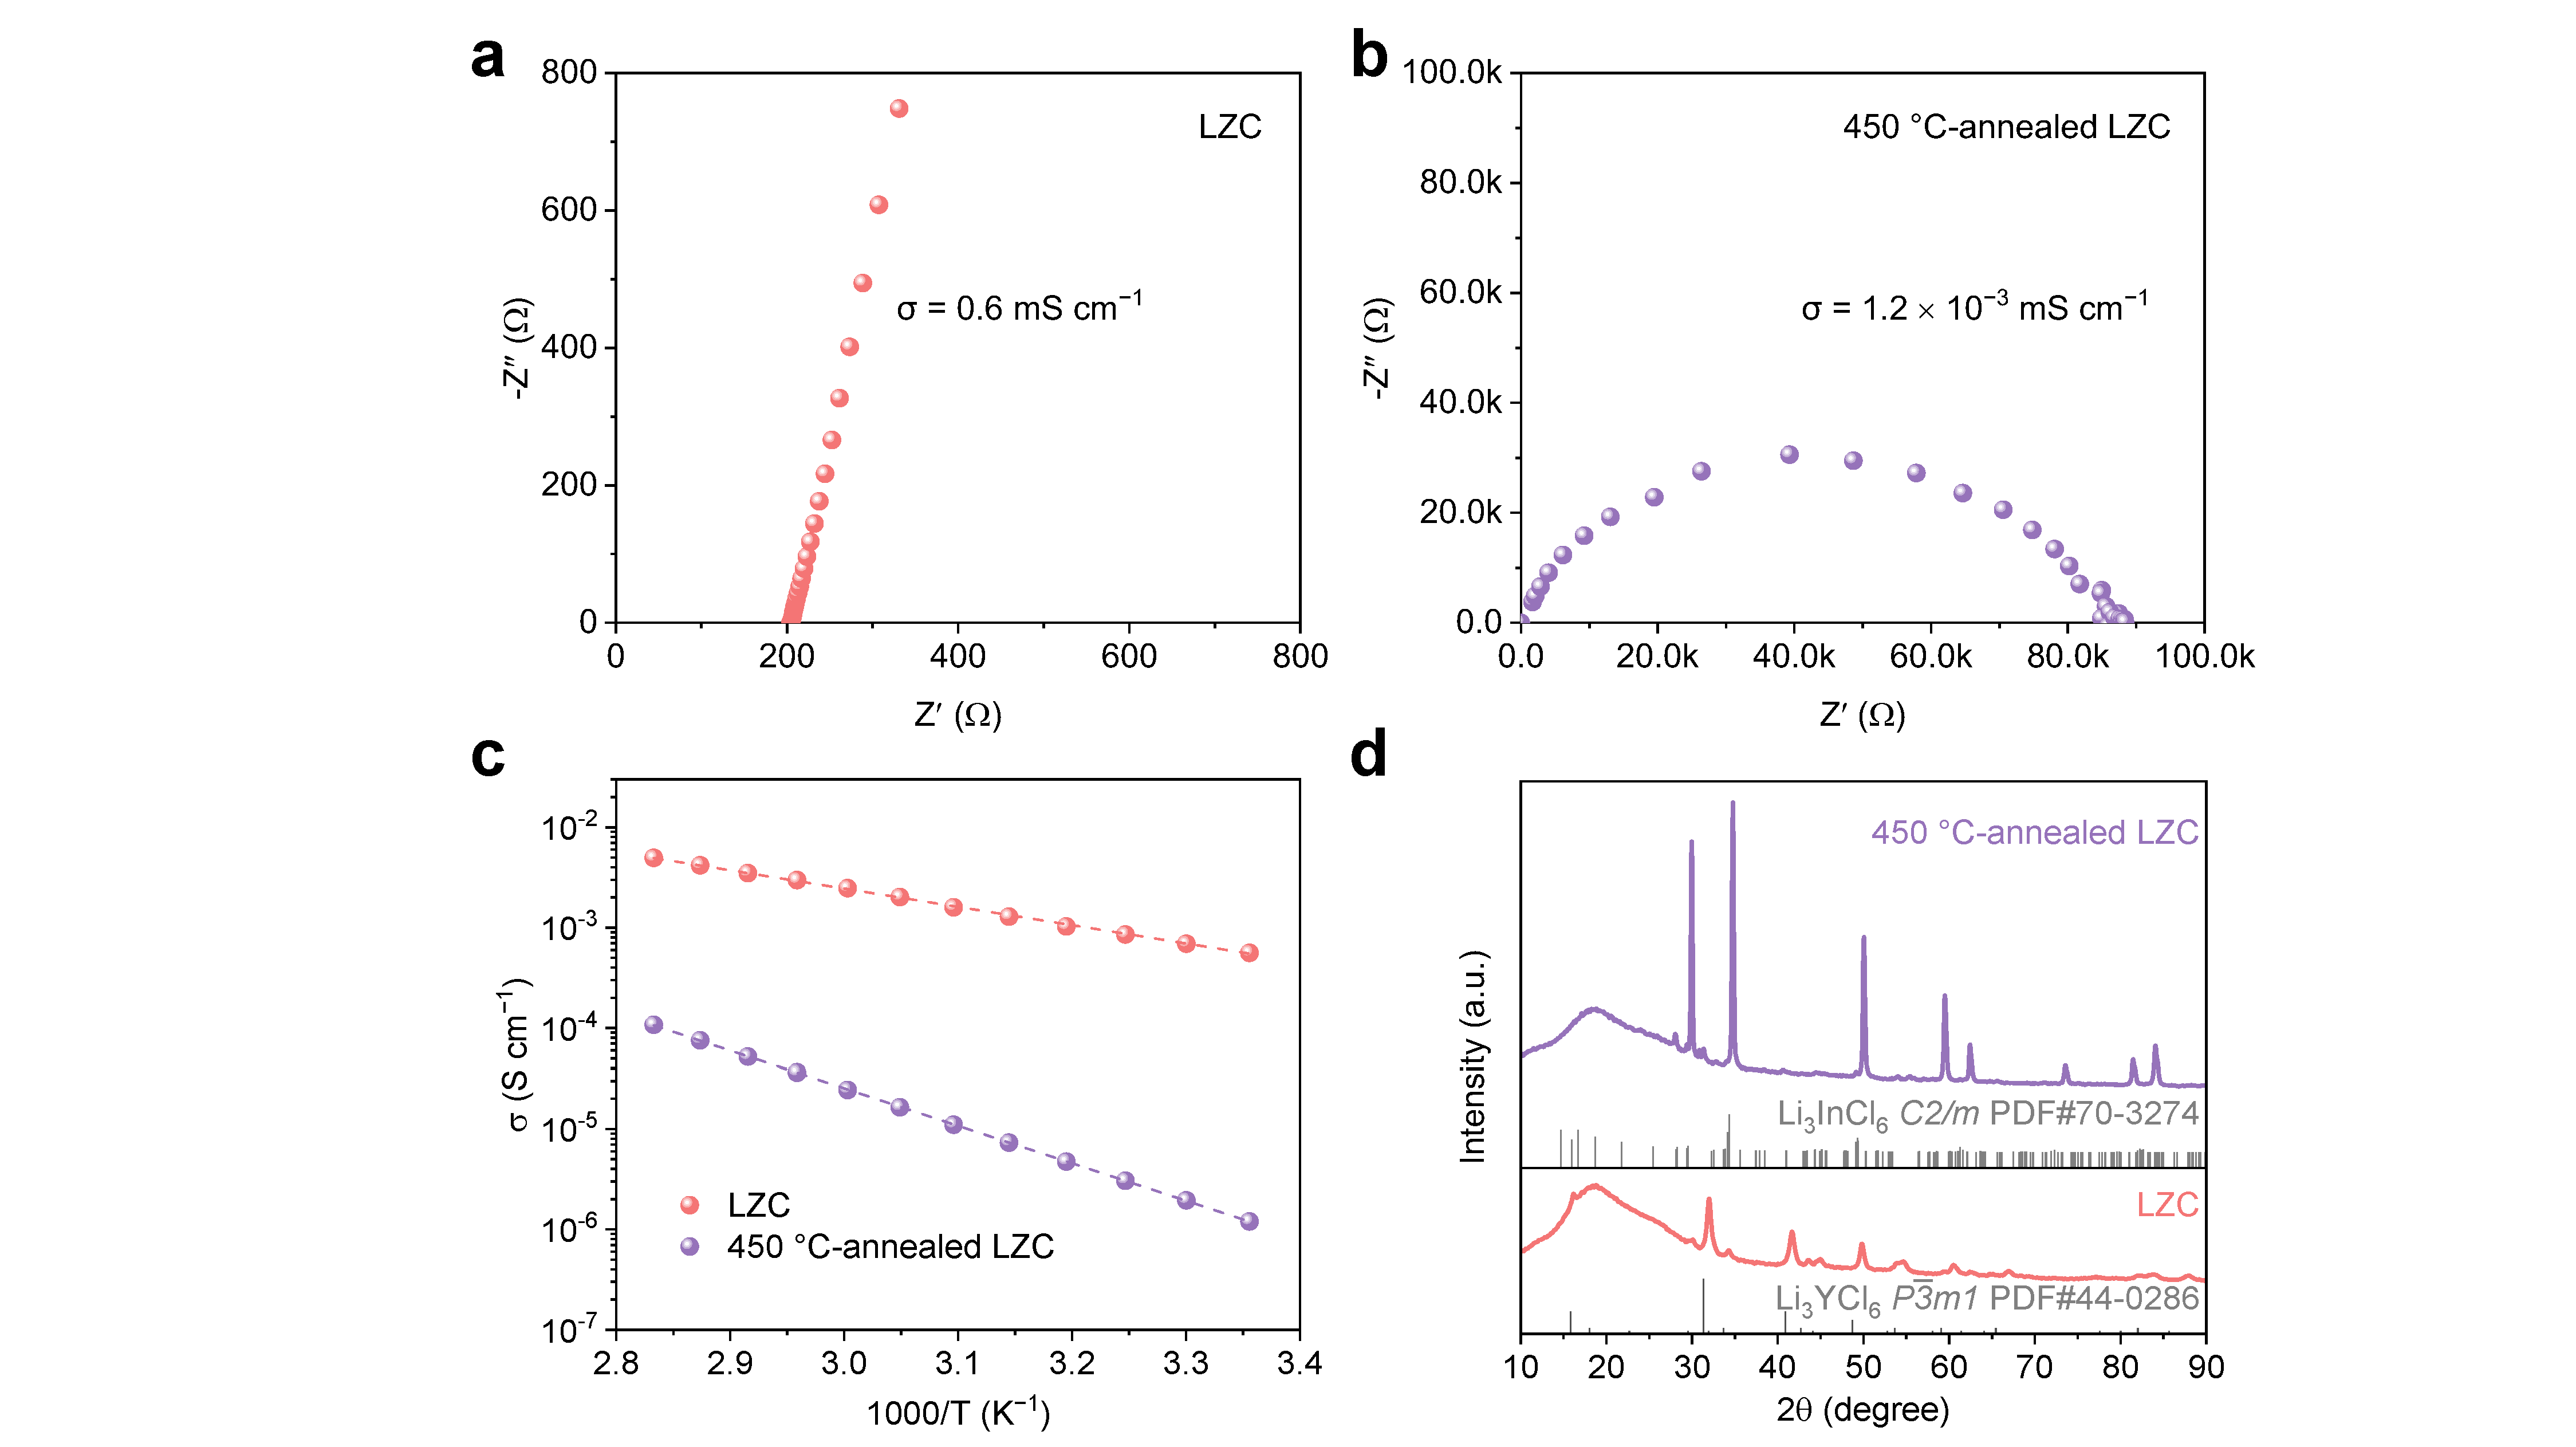


**Supplementary Fig. 1 |** **a**,**b** Nyquist plots of the LZC (**a**) and 450 °C-annealed LZC (**b**). **c** Arrhenius plots of the LZC and 450 °C-annealed LZC. **d** XRD patterns of the LZC and 450 °C-annealed LZC.

**Discussion:** The base material, LZC, was synthesized by ball-milling a stoichiometric mixture of LiCl and ZrCl4. The as-milled LZC displays a markedly different ionic conductivity at room temperature compared to that of the annealed material at elevated temperatures. As evidenced by EIS measurements (**Supplementary Fig. 1a)**, the as-milled LZC exhibits a high ionic conductivity of 0.6 mS cm−1 at room temperature. Conversely, annealing the LZC at 450 °C for 5 h significantly reduces the ionic conductivity at room temperature by two orders of magnitude, as illustrated in **Supplementary Fig. 1b,c**, where the ionic conductivity is observed to be 1.2 × 10−3 mS cm−1. The XRD patterns of the as-milled and 450 °C-annealed LZC are displayed in **Supplementary Fig. 1d.** The as-milled LZC displays weak and diffuse reflections, indicating that the intense planetary milling process has led to a low degree of crystallinity. The main peaks of the as-milled LZC align with those of trigonal Li3YCl6, which crystallizes with the symmetry. In contrast, the 450 °C-annealed LZC not only demonstrates enhanced crystallinity and sharper reflections but also exhibits a different crystal structure. The reflections closely correspond to those of monoclinic Li3InCl6 ( space group). It is evident that, unlike other HSEs, LZC transforms both crystallinity and crystal structure upon annealing at high temperatures.


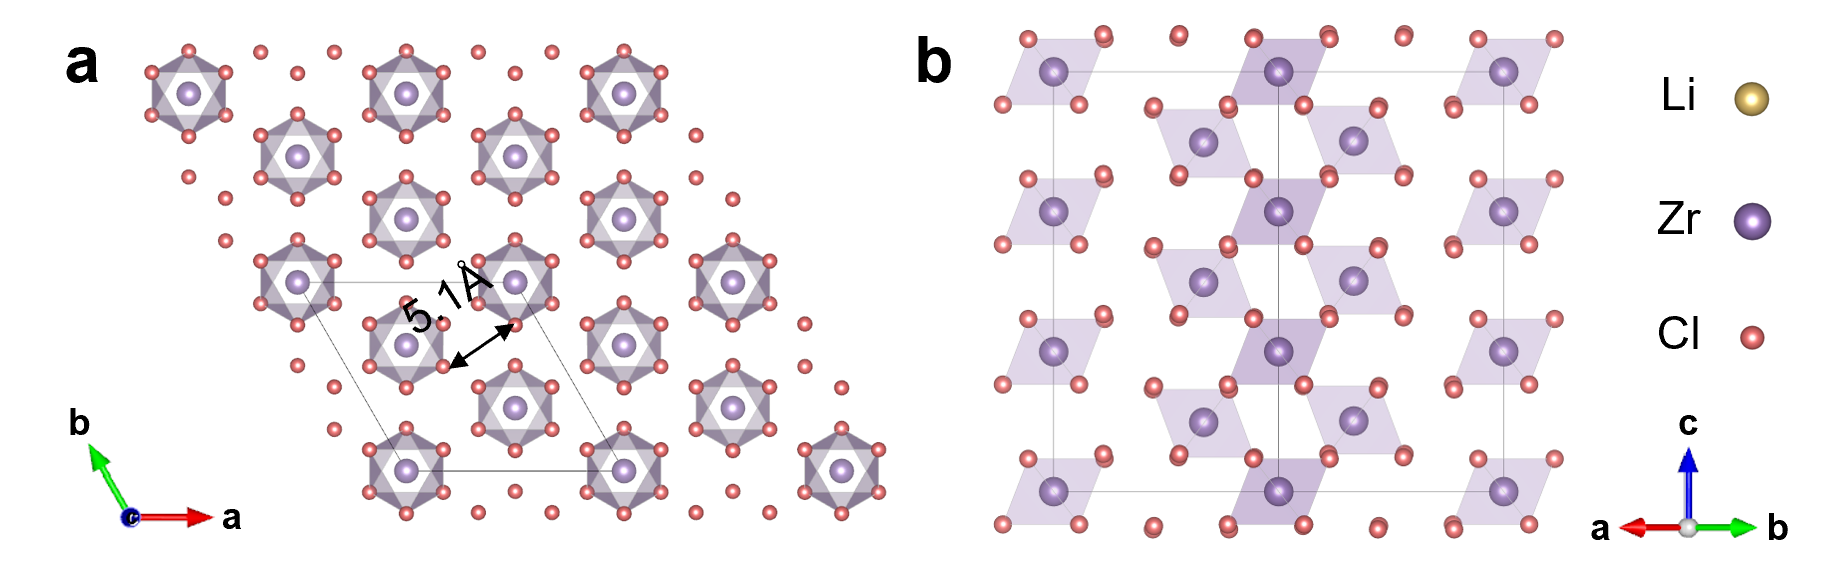


**Supplementary Fig. 2 |** **a** A top view of the ZrCl6 lattice along the *c*-axis is presented, with the unit cell outlined by the lines. The structure features intrinsically preexisting channels along the *c*-axis, with an inner diameter of 5.1 Å. **b** A side view of the ZrCl6 lattice reveals the Zr polyhedra arranged in an ABA stacking configuration, providing sufficient interlayer space for in-plane Li⁺ migration. The presence of Li ions within the lattice suggests migration both along the *c*-axis and in the plane.

**Discussion:** **Supplementary Fig. 2** illustrates the trigonal-phase LZC lattice, which features an extensive network of one-dimensional (1D) channels aligned along the *c*-axis, each with an inner diameter of 5.1 Å. These channels, formed by [ZrCl6] octahedra in an ABA stacking arrangement, provide abundant sites for Li+ migration. Additionally, the interatomic spacing between Zr atoms within the *a-b* plane establishes secondary diffusion pathways along both the *a*- and *b*-axes.


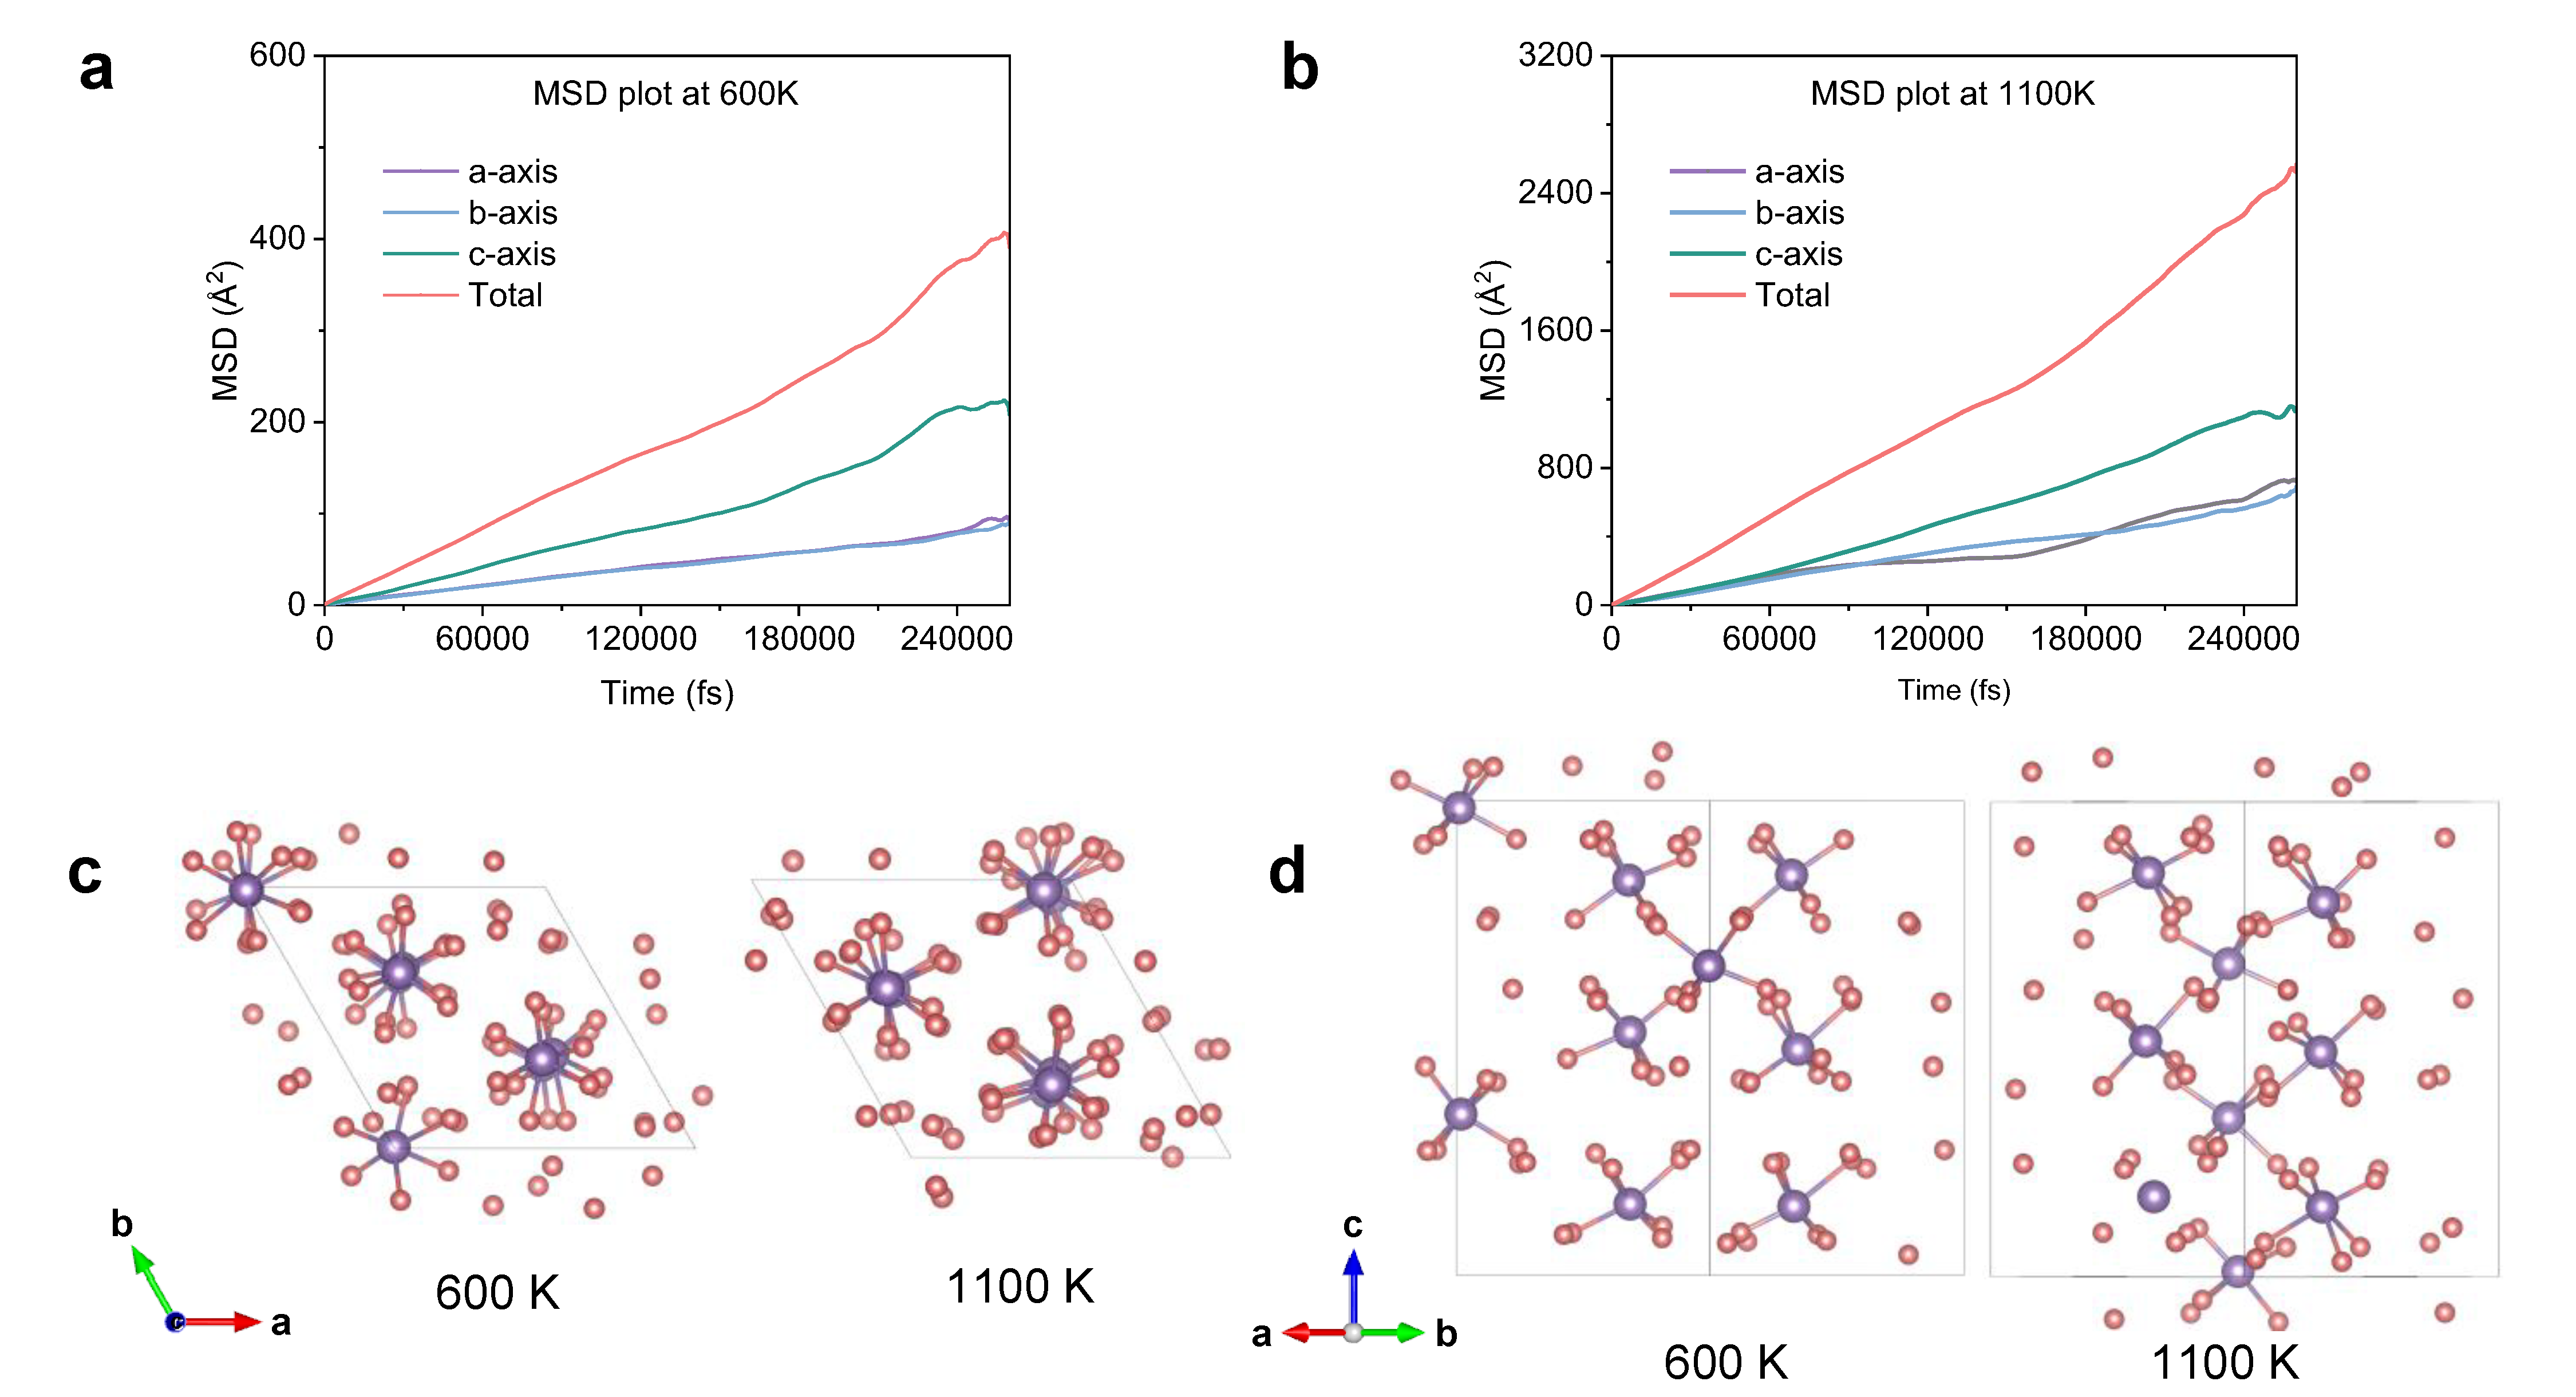


**Supplementary Fig. 3 |** **a,b** Plots of the MSD along each direction for LZC at varying temperatures—600 K (lowest) and 1100 K (highest)—reveal that the *c*-axis diffusion channel plays a predominant role in the overall diffusion process. **c,d** The structures of LZC after 260 ps of AIMD simulations at 600 K and 1100 K show that the positions of Zr remain stable, demonstrating the stability of the [ZrCl6] framework at high temperatures.

**Discussion:** Our AIMD simulations demonstrate that the dominant Li⁺ migration occurs along the c-axis 1D channels (**Fig. 1a**), a conclusion further supported by MSD analysis (**Supplementary Fig. 3**). To optimize bulk Li⁺ transport, it is essential to maximize the number of active diffusion directions and establish a 3D percolating network. However, in the current lattice, the *a-b* plane exhibits limited connectivity—while this minimizes channel blockage, it also restricts in-plane diffusivity, resulting in sluggish migration.


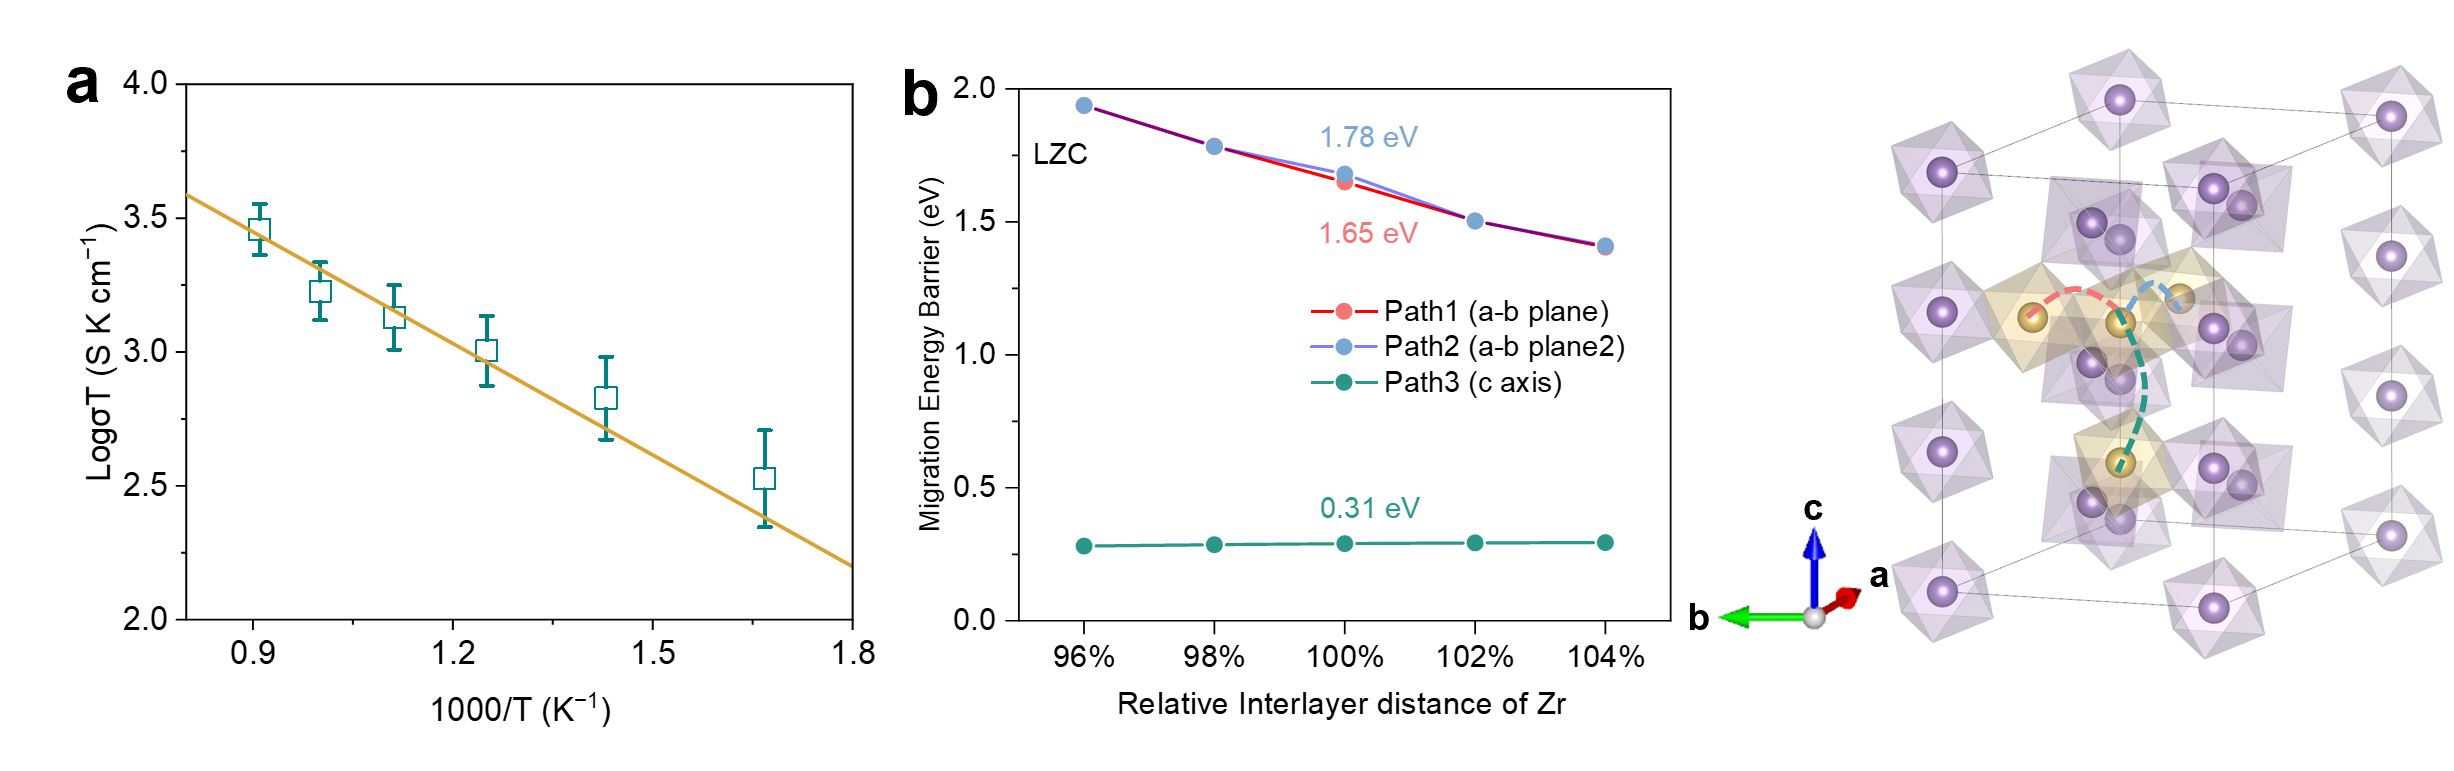


**Supplementary Fig. 4 |** **a** Arrhenius plot of Li+ diffusivity in the LZC lattice from AIMD simulations at 1,100, 1,000, 900, 800, 700, and 600 K. The yellow line represents the linear fitting of the Arrhenius plots of Li+ conductivity from AIMD simulations, which is used to extrapolate the Li+ conductivity at 300 K to be 6.4630 ± 3.8842 mS cm⁻1. **b** Li+ migration paths in the LZC lattice and corresponding energy barriers with different interlayer distances. The path 1 (red) and path 2 (blue) represent Li+ migration in *a-b* plane, while path 3 (green) is the transport of Li+ along the *c* axis.

**Discussion:** High-temperature AIMD-derived conductivities (**Supplementary Fig. 4a**) yield an extrapolated ionic conductivity, σ (300 K) = 6.46 ± 3.88 mS cm⁻1, with an activation energy *Eₐ* = 0.257 ± 0.015 eV (uncertainties derived from the Arrhenius fit covariance matrix). The single-ion energy landscape (**Supplementary Fig. 4b**) reveals a low barrier of 0.31 eV along the *c*-axis (green path), contrasting sharply with the substantially higher barriers of 1.65 eV (*a*-axis, red path) and 1.78 eV (*b*-axis, blue path) within the *a-b* plane. Notably, reducing the interlayer spacing selectively elevates the in-plane barriers while leaving the *c*-axis barrier virtually unaffected. This asymmetry likely stems from the fact that layer contraction narrows in-plane migration windows and intensifies short-range repulsion at the saddle point, whereas the *c*-axis pathway traverses a series of polyhedral voids that remain largely insensitive to interlayer distance.

**
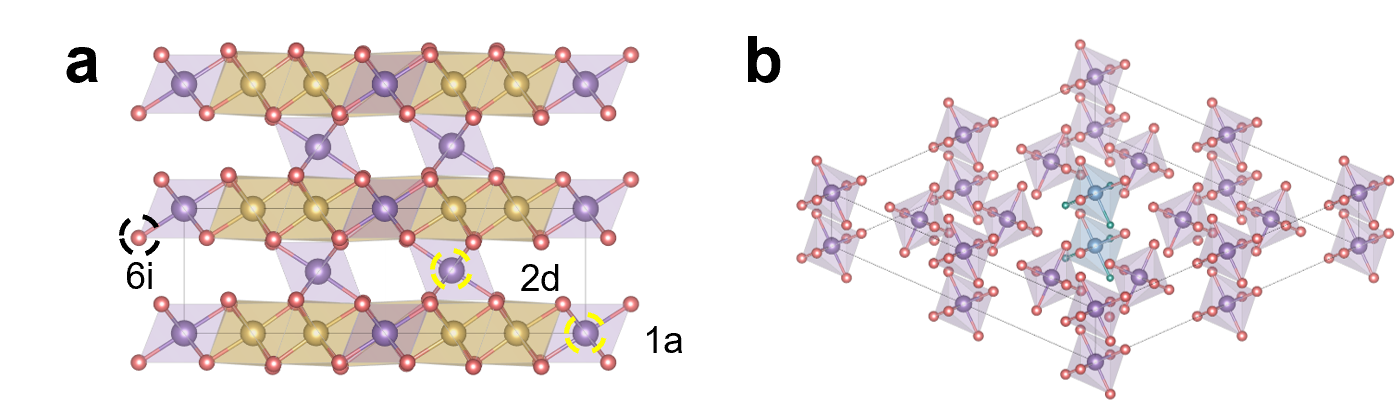
**

**Supplementary Fig. 5 |** **a,b** Potential doping sites for LZC (**a**) and potential crystal structure (**b**). LZC is a kind of 1D channel material, with the space group of There are only 6i sites available for anion substitution, while there are 1a and 2d sites suitable for cation substitution.


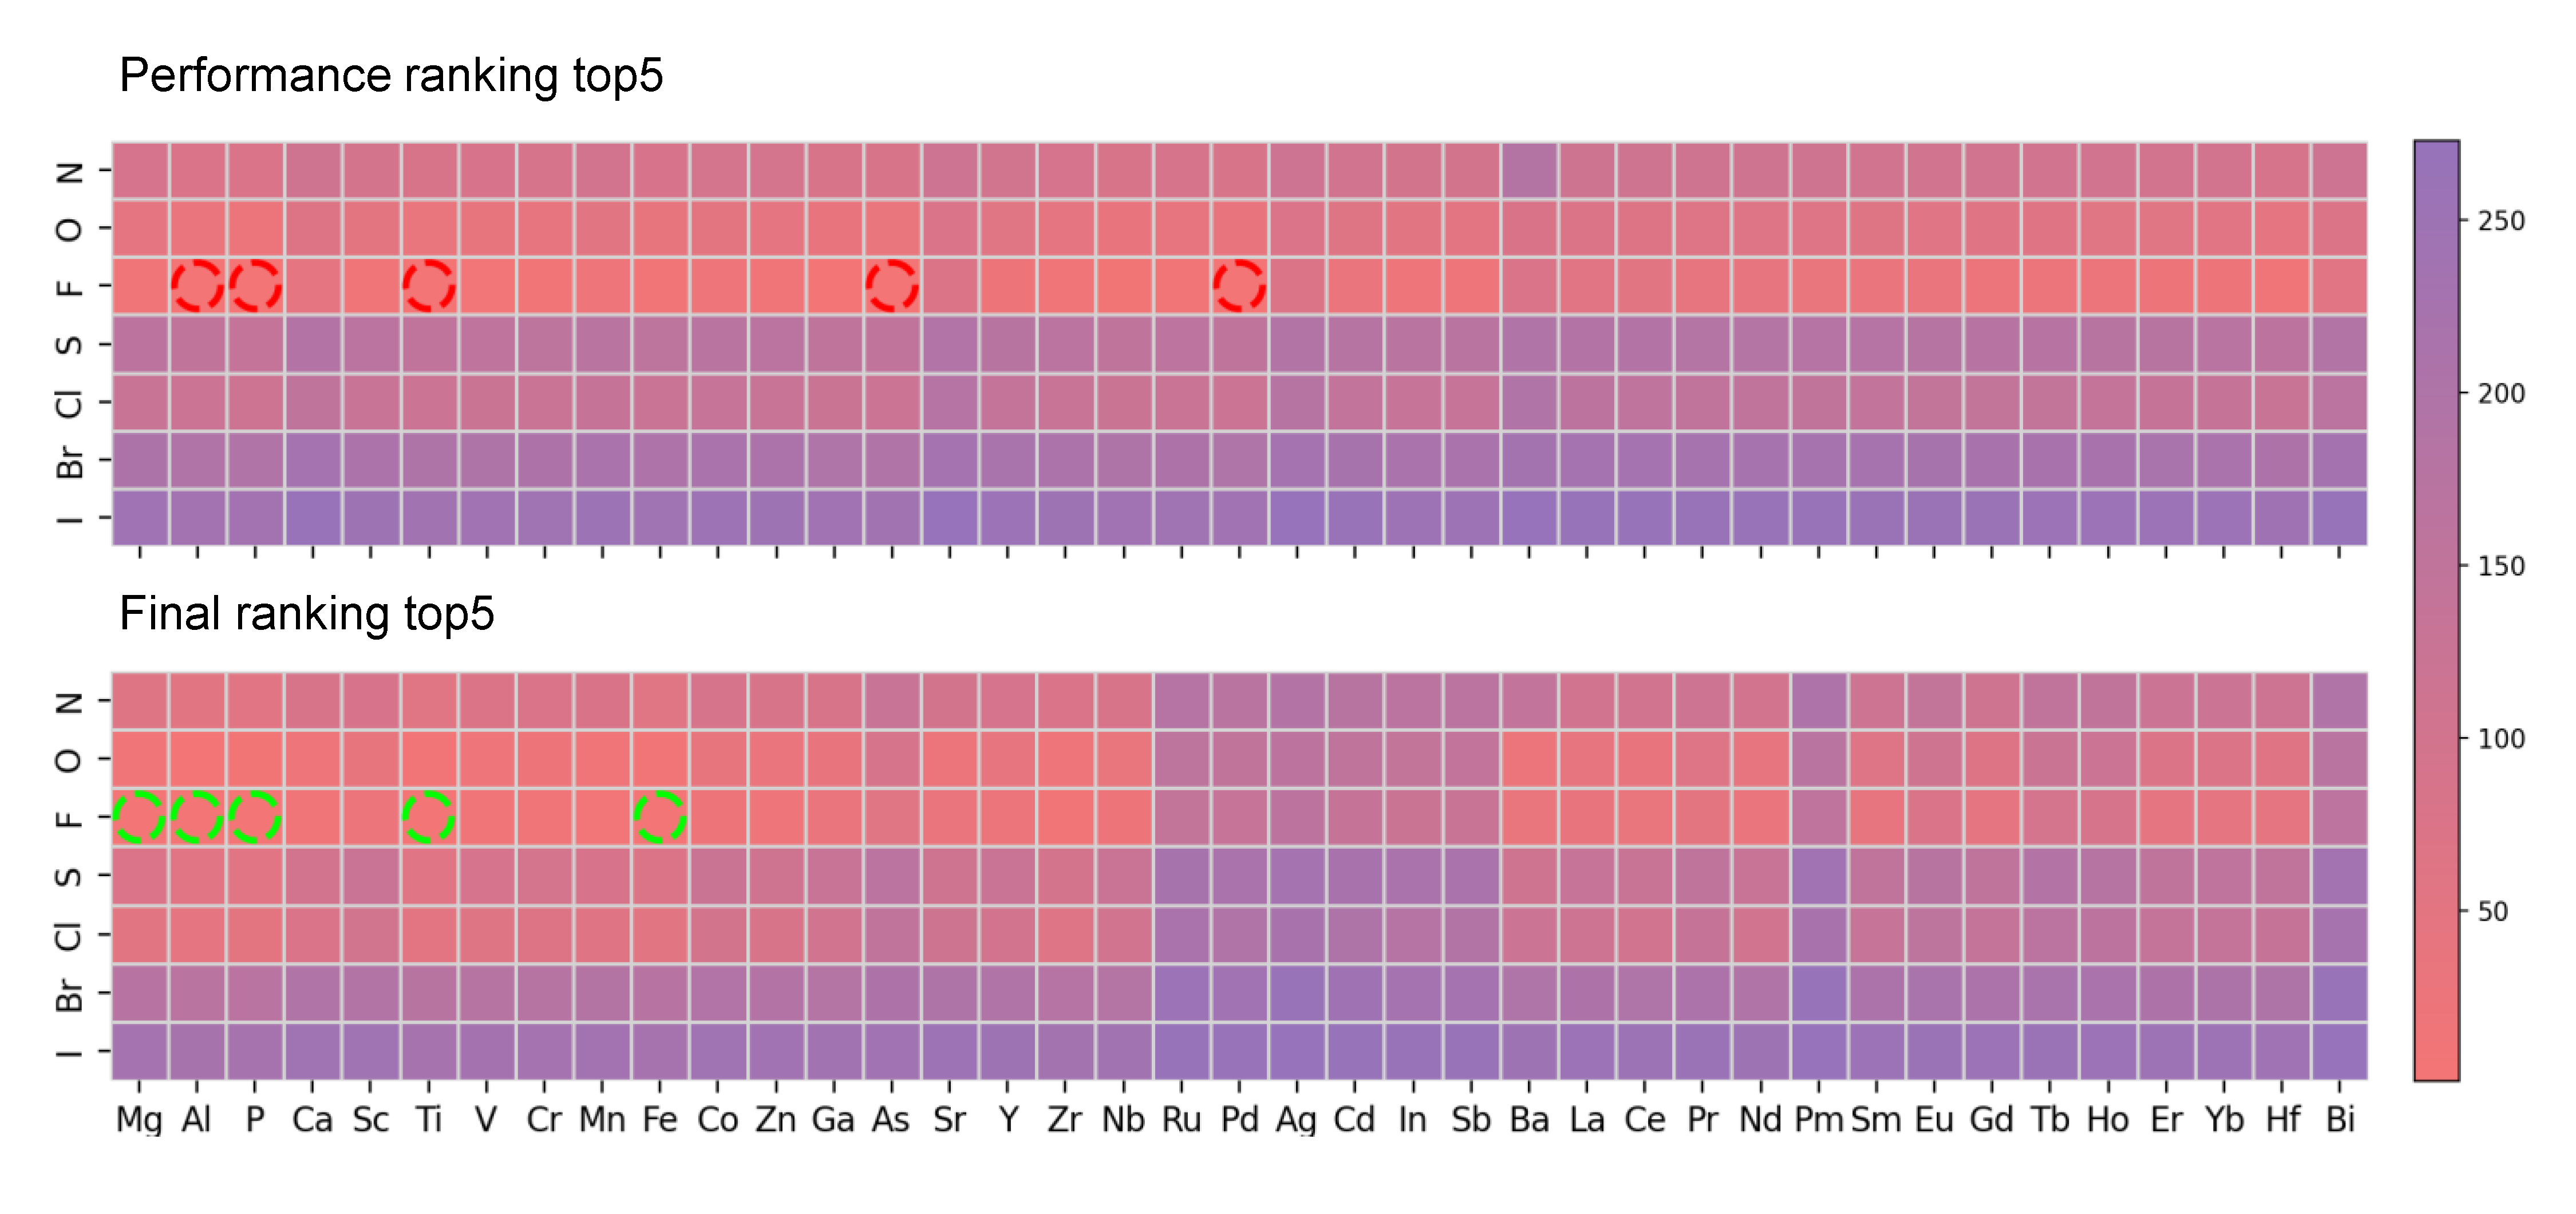


**Supplementary Fig. 6 |** The heatmaps present the performance rankings of all doping combinations. In the upper panel, the top five combinations—P and F, Al and F, Ti and F, Mg and F, and V and F—are highlighted with circles. In the lower panel, the top five combinations ranked by a weighted score of performance and cost are P and F, Al and F, Ti and F, Mg and F, and Fe and F. The final top three combinations (P and F, Al and F, Ti and F) were selected for subsequent experimental validation.


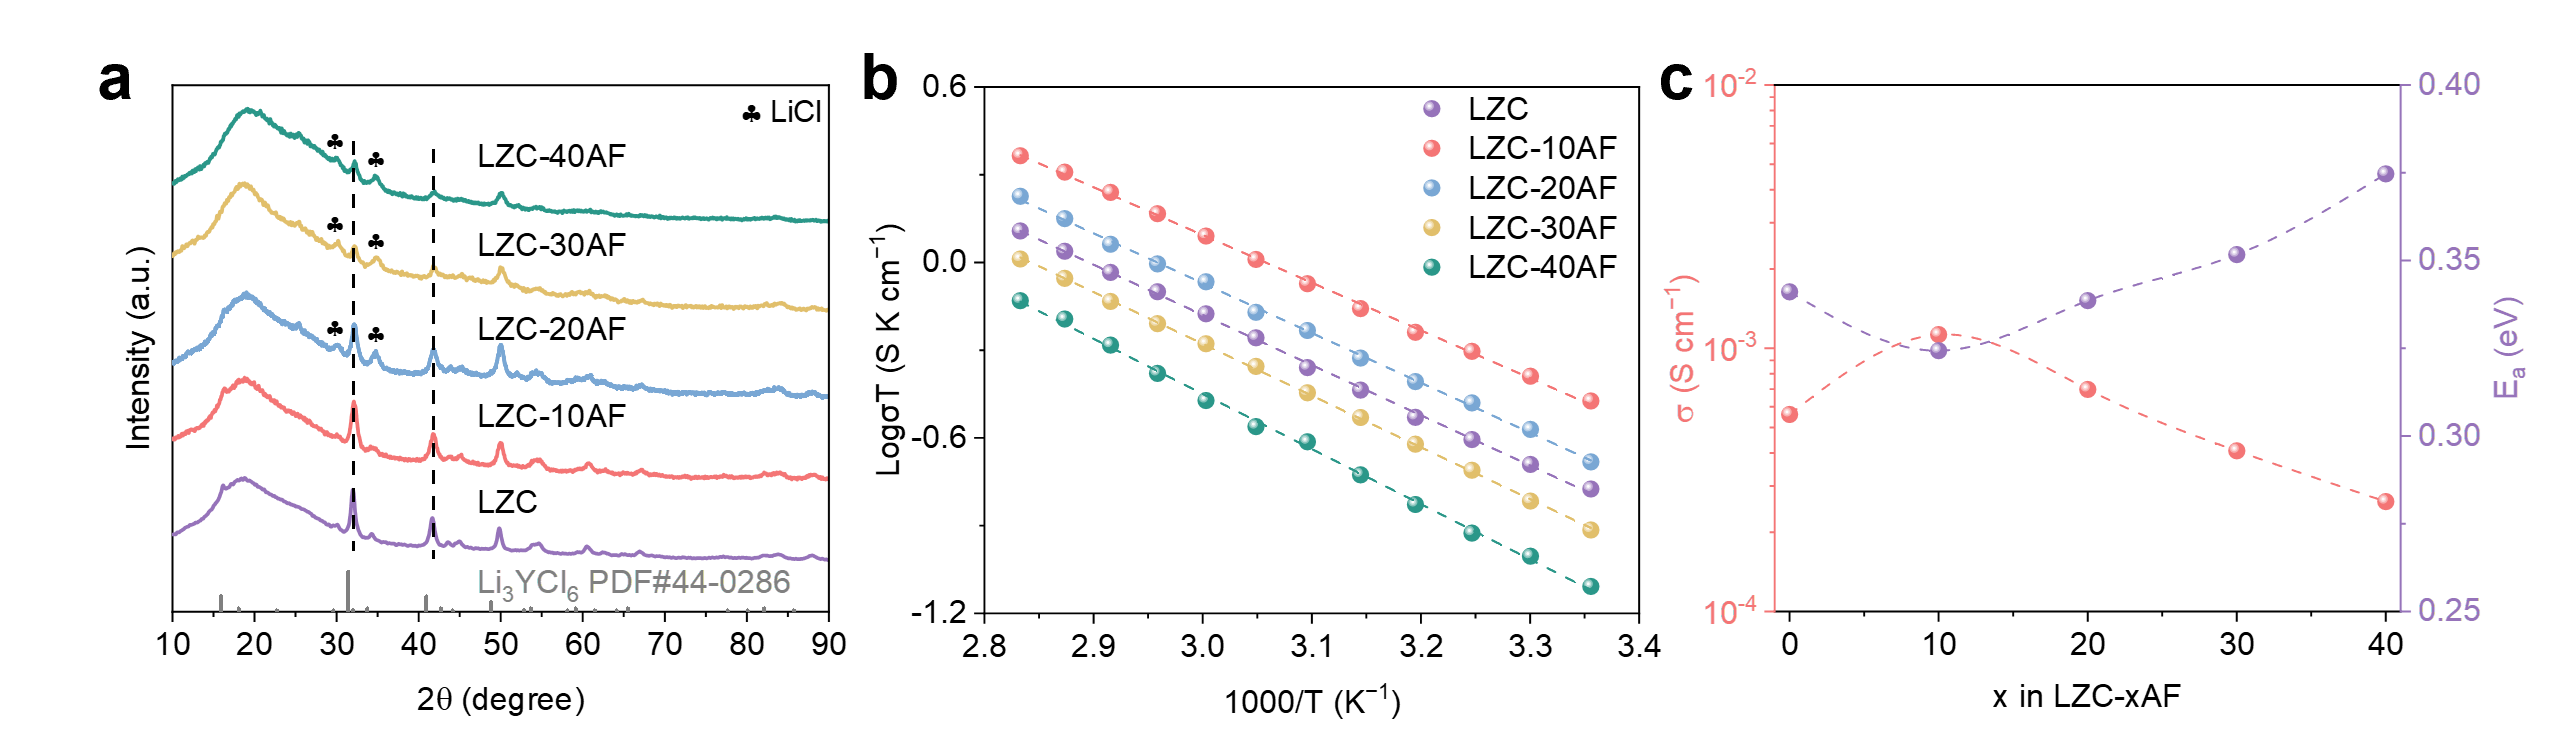


**Supplementary Fig. 7 | a** XRD patterns for a series of Li2Zr1−xAlxCl6−3xF3x (denoted as LZC-xAF, where x% is the AlF3 substitution percentage, x = 0, 10, 20, 30, 40). **b** Arrhenius plots of the prepared LZC-xAF electrolytes (x = 0, 10, 20, 30, 40) **c** Ionic conductivities and activation energy for the prepared LZC-xAF electrolytes.

**Discussion: Supplementary Fig. 7a** presents the XRD patterns of the LZC-xAF (0 ≤ x ≤ 40), which align well with the pattern of trigonal Li3YCl6 with space group. Peak shifts toward higher angles with increasing AlF3 doping indicate progressive unit cell contraction, driven by the smaller ionic radii of Al3+ and F− compared to Zr4+ and Cl−, respectively. For x ≥ 20, intensity variations in peaks between 31.9° and 41.7° occur, accompanied by detectable LiCl peaks at 29.9° and 34.7°, signaling AlF3 doping exceeding the critical solubility limit and subsequent LiCl impurity formation. **Supplementary Fig. 7b,c** reveal that LZC-10AF exhibits the highest room-temperature ionic conductivity (1.1 mS cm−1) and lowest activation energy (0.32 eV) among the tested samples.


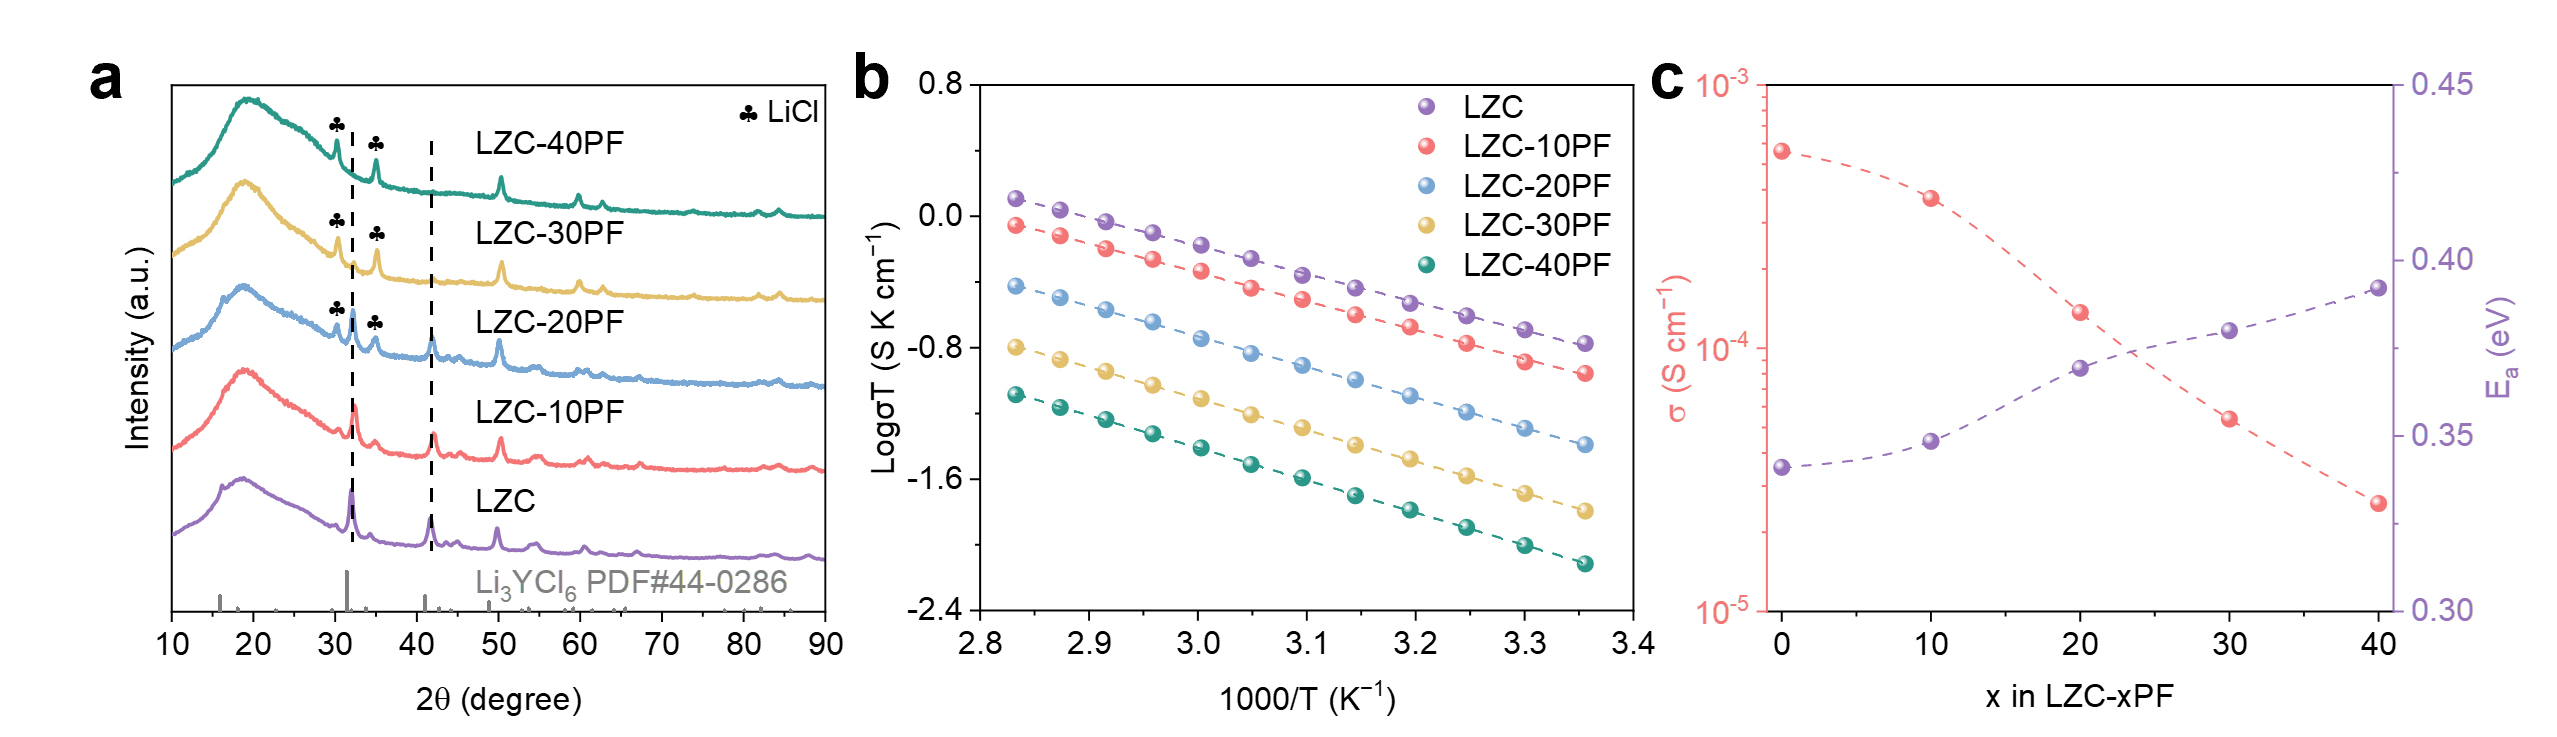


**Supplementary Fig. 8 | a** XRD patterns for a series of Li2Zr1−xPxCl6−3xF4x (denoted as LZC-xPF, where x% is the P substitution percentage, x = 0, 10, 20, 30, 40). **b** Arrhenius plots of the prepared LZC-xPF electrolytes (x = 0, 10, 20, 30, 40). **c** Ionic conductivities and activation energy for the prepared LZC-xPF electrolytes.

**Discussion:** Since PF3 and PCl3 exist as gas and liquid, respectively, under ambient conditions, they cannot be directly employed as electrolyte precursors for ball milling. Consequently, PCl5 and ZrF4 were used to incorporate P and F into the LZC matrix. **Supplementary Fig. 8a** displays XRD patterns of LZC-xPF (0 ≤ x ≤ 40), aligning with trigonal Li3YCl6 (space group ). Consistent with LZC-xAF, peaks shift toward higher angles with increased P and F doping, indicating unit cell contraction due to the smaller ionic radii of P5+ and F− compared to Zr4+ and Cl−, respectively. For x ≥ 20, peak intensity variations between 31.9° and 41.7° emerge alongside LiCl peaks at 29.9° and 34.7°, signaling exceeded critical solubility and LiCl impurity formation. **Supplementary Fig. 8b,c** demonstrate inferior ionic conductivity (0.4 mS cm−1) and higher activation energy (0.35 eV) for LZC-10PF compared to pristine LZC, attributed to the inability to directly introduce gaseous PF3 into the LZC matrix.


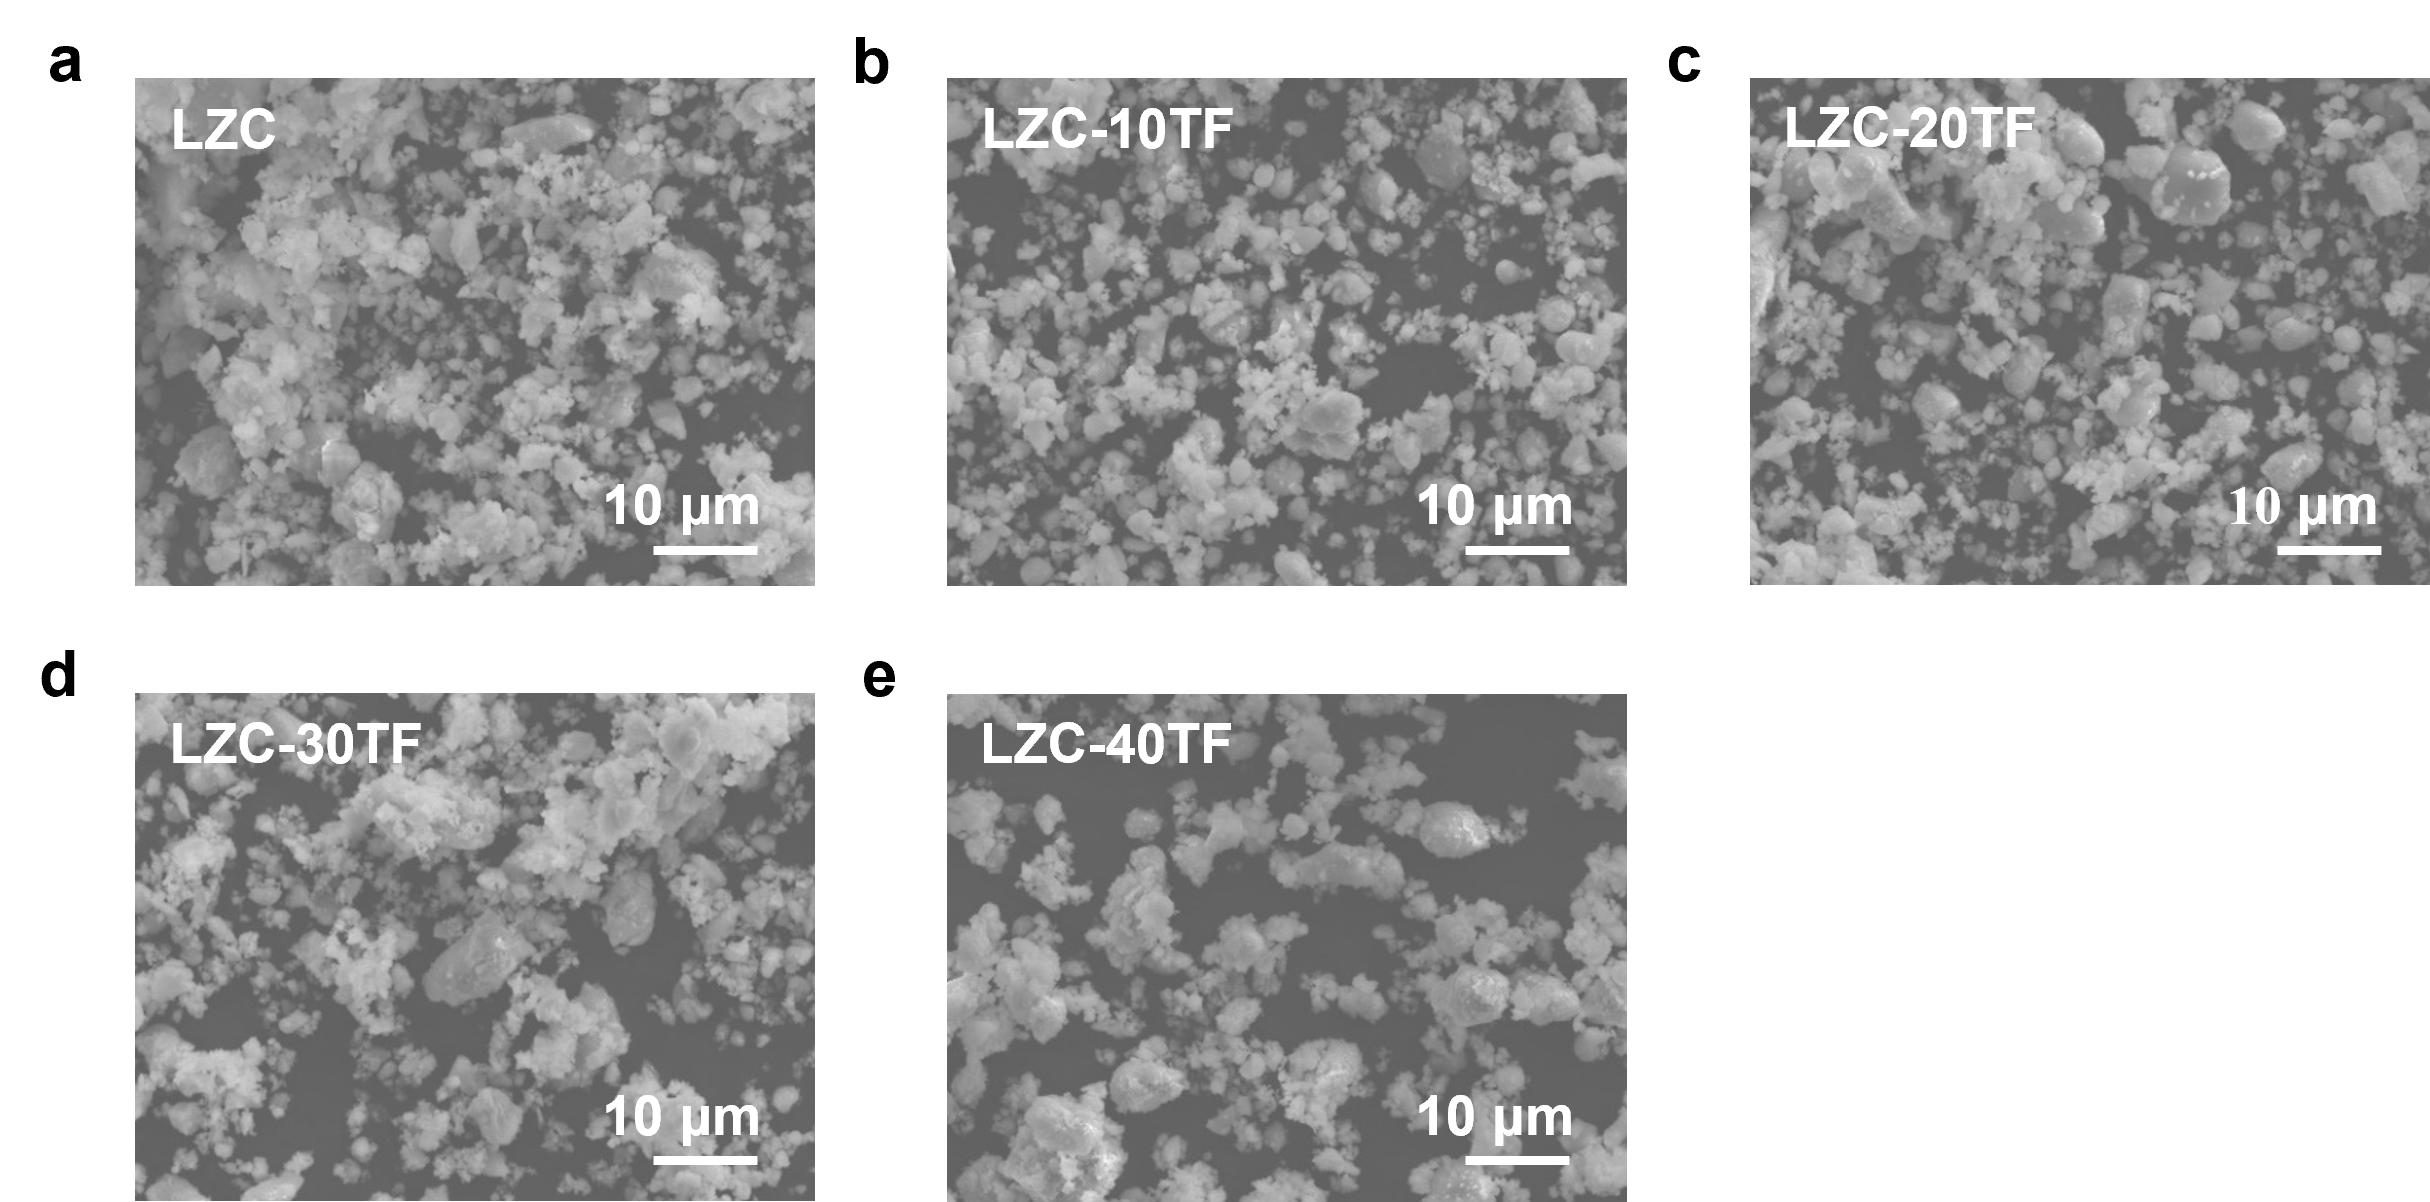


**Supplementary Fig. 9 | a-e** SEM images of the prepared LZC (**a**), LZC-10TF (**b**), LZC-20TF (**c**), LZC-30TF (**d**), and LZC-40TF (**e**) electrolytes. These LZC-xTF HSEs display an aggregate-like morphology with particle sizes ranging from a few to several micrometers.

**
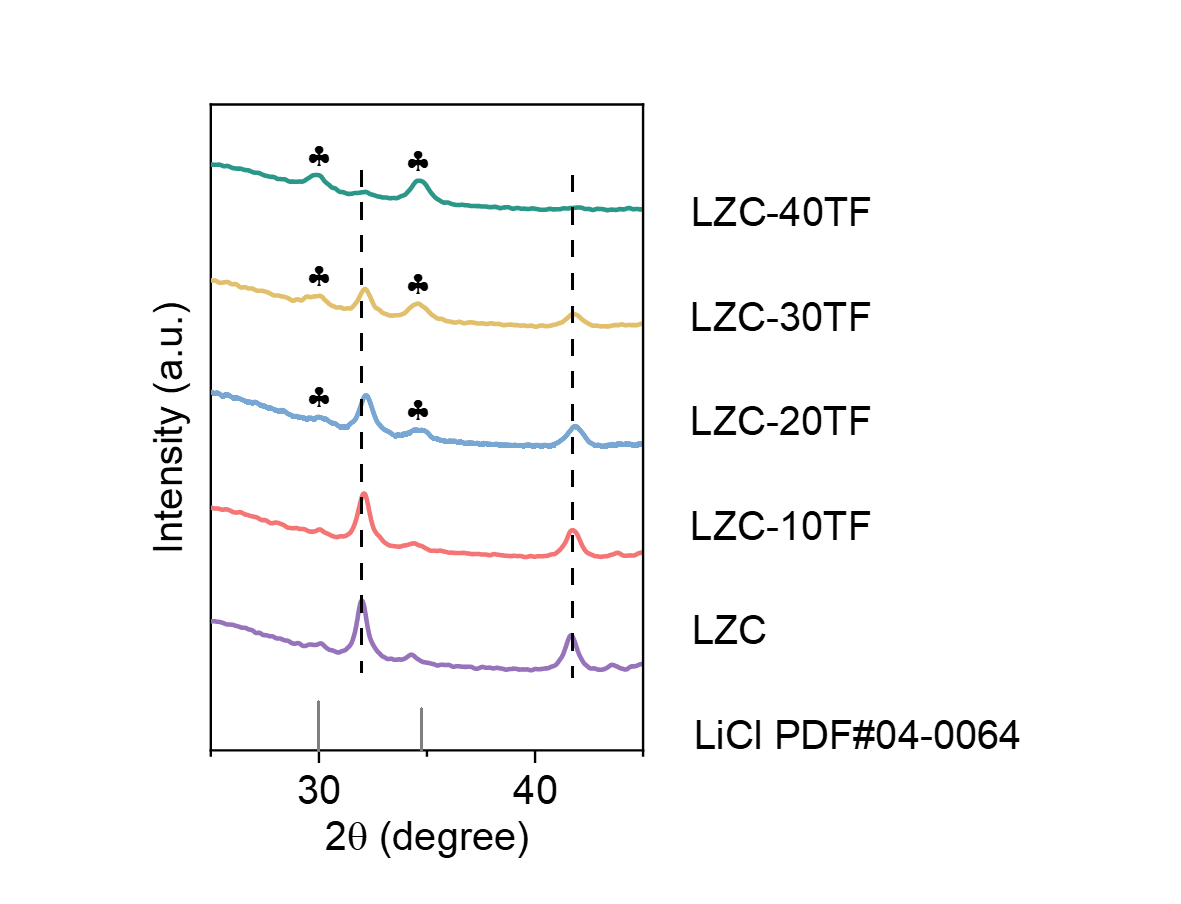
**

**Supplementary Fig. 10 |** Magnified XRD patterns of the LZC-xTF electrolytes (x = 0, 10, 20, 30, 40) in the 2θ range from 30° to 60°.

**Discussion: Fig. 3a** presents XRD patterns of the nominal composition LZC-xTF over a wide range of x values (0 ≤ x ≤ 40), which match well with the pattern of trigonal Li3YCl6 with space group. A magnified analysis of the XRD patterns (**Supplementary Fig. 10**) reveals that the diffraction peaks shift to higher angles with increasing TiF3 doping content. This shift suggests a gradual contraction of the LZC-xTF unit cell, attributed to the smaller ionic radius of Ti3+ and F− compared to Zr4+ and Cl−, respectively. For doping levels of x ≥ 20, a distinct change in peak intensity between 31.9° and 41.7° was observed, along with the appearance of LiCl impurity peaks at 29.9° and 34.7°, indicating that the doping level has exceeded the solubility for TiF3.

**
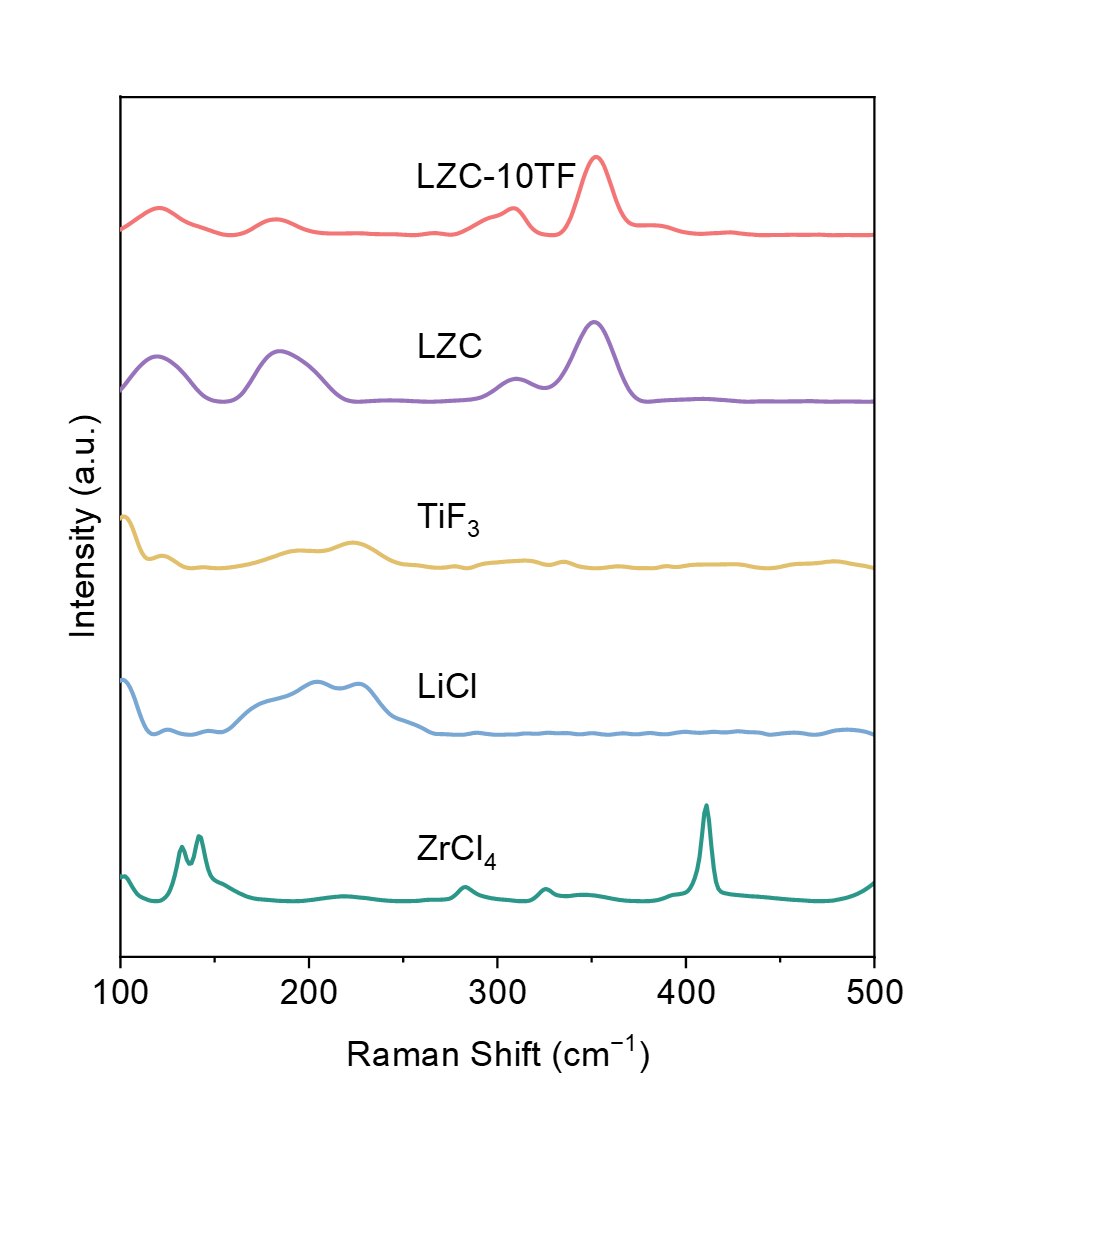
**

**Supplementary Fig. 11 |** Raman spectra of the LZC-xTF, TiF3, LiCl, and ZrCl4.

**Discussion:** The Raman spectrum of LZC-10TF differs distinctly from those of the precursors (ZrCl4, LiCl, and TiF3) but remains similar to that of LZC, confirming the successful introduction of Ti and F into the LZC lattice.

**
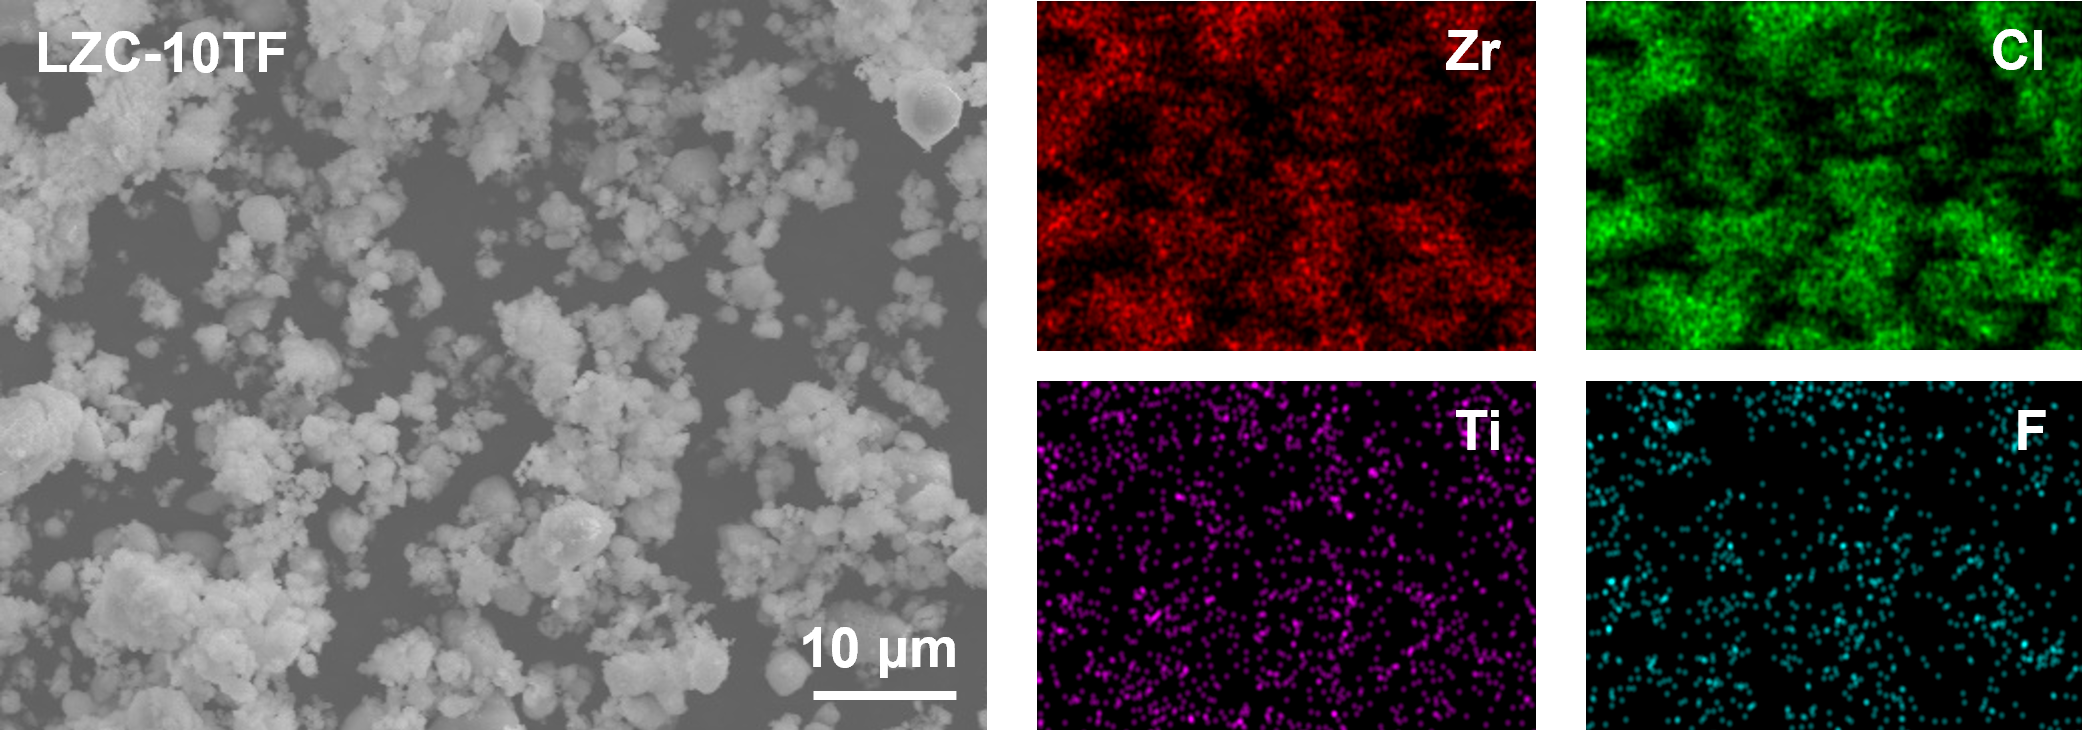
**

**Supplementary Fig. 12 |** SEM images of the corresponding EDS mapping of the prepared LZC-10TF.

**
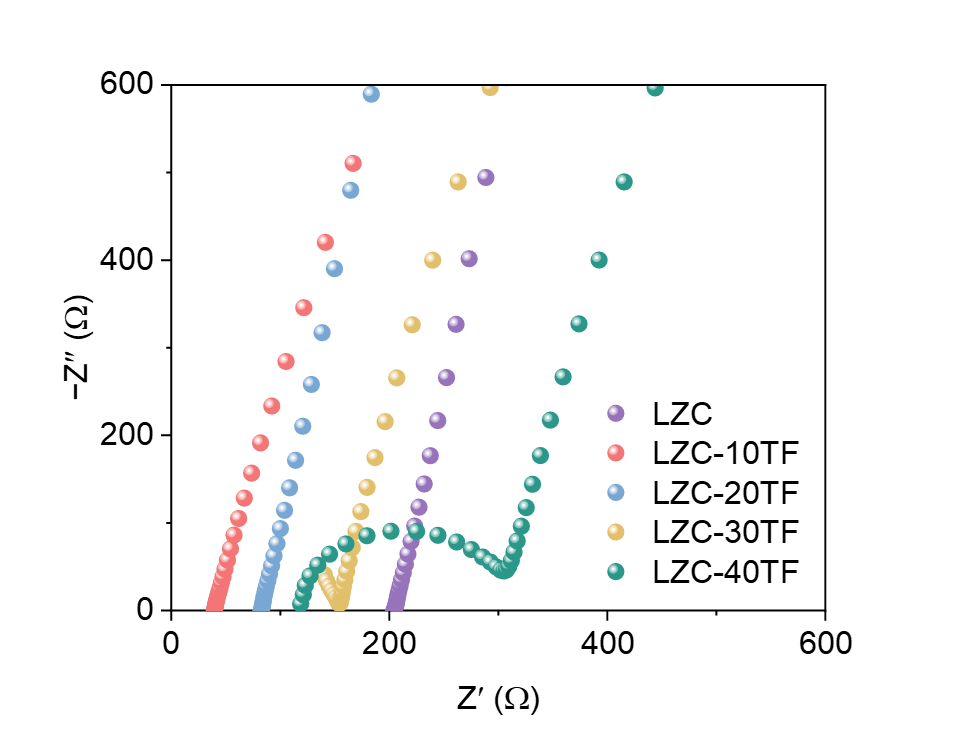
**

**Supplementary Fig. 13 |** Nyquist plots of the prepared LZC-xTF (x = 0, 10, 20, 30, 40).


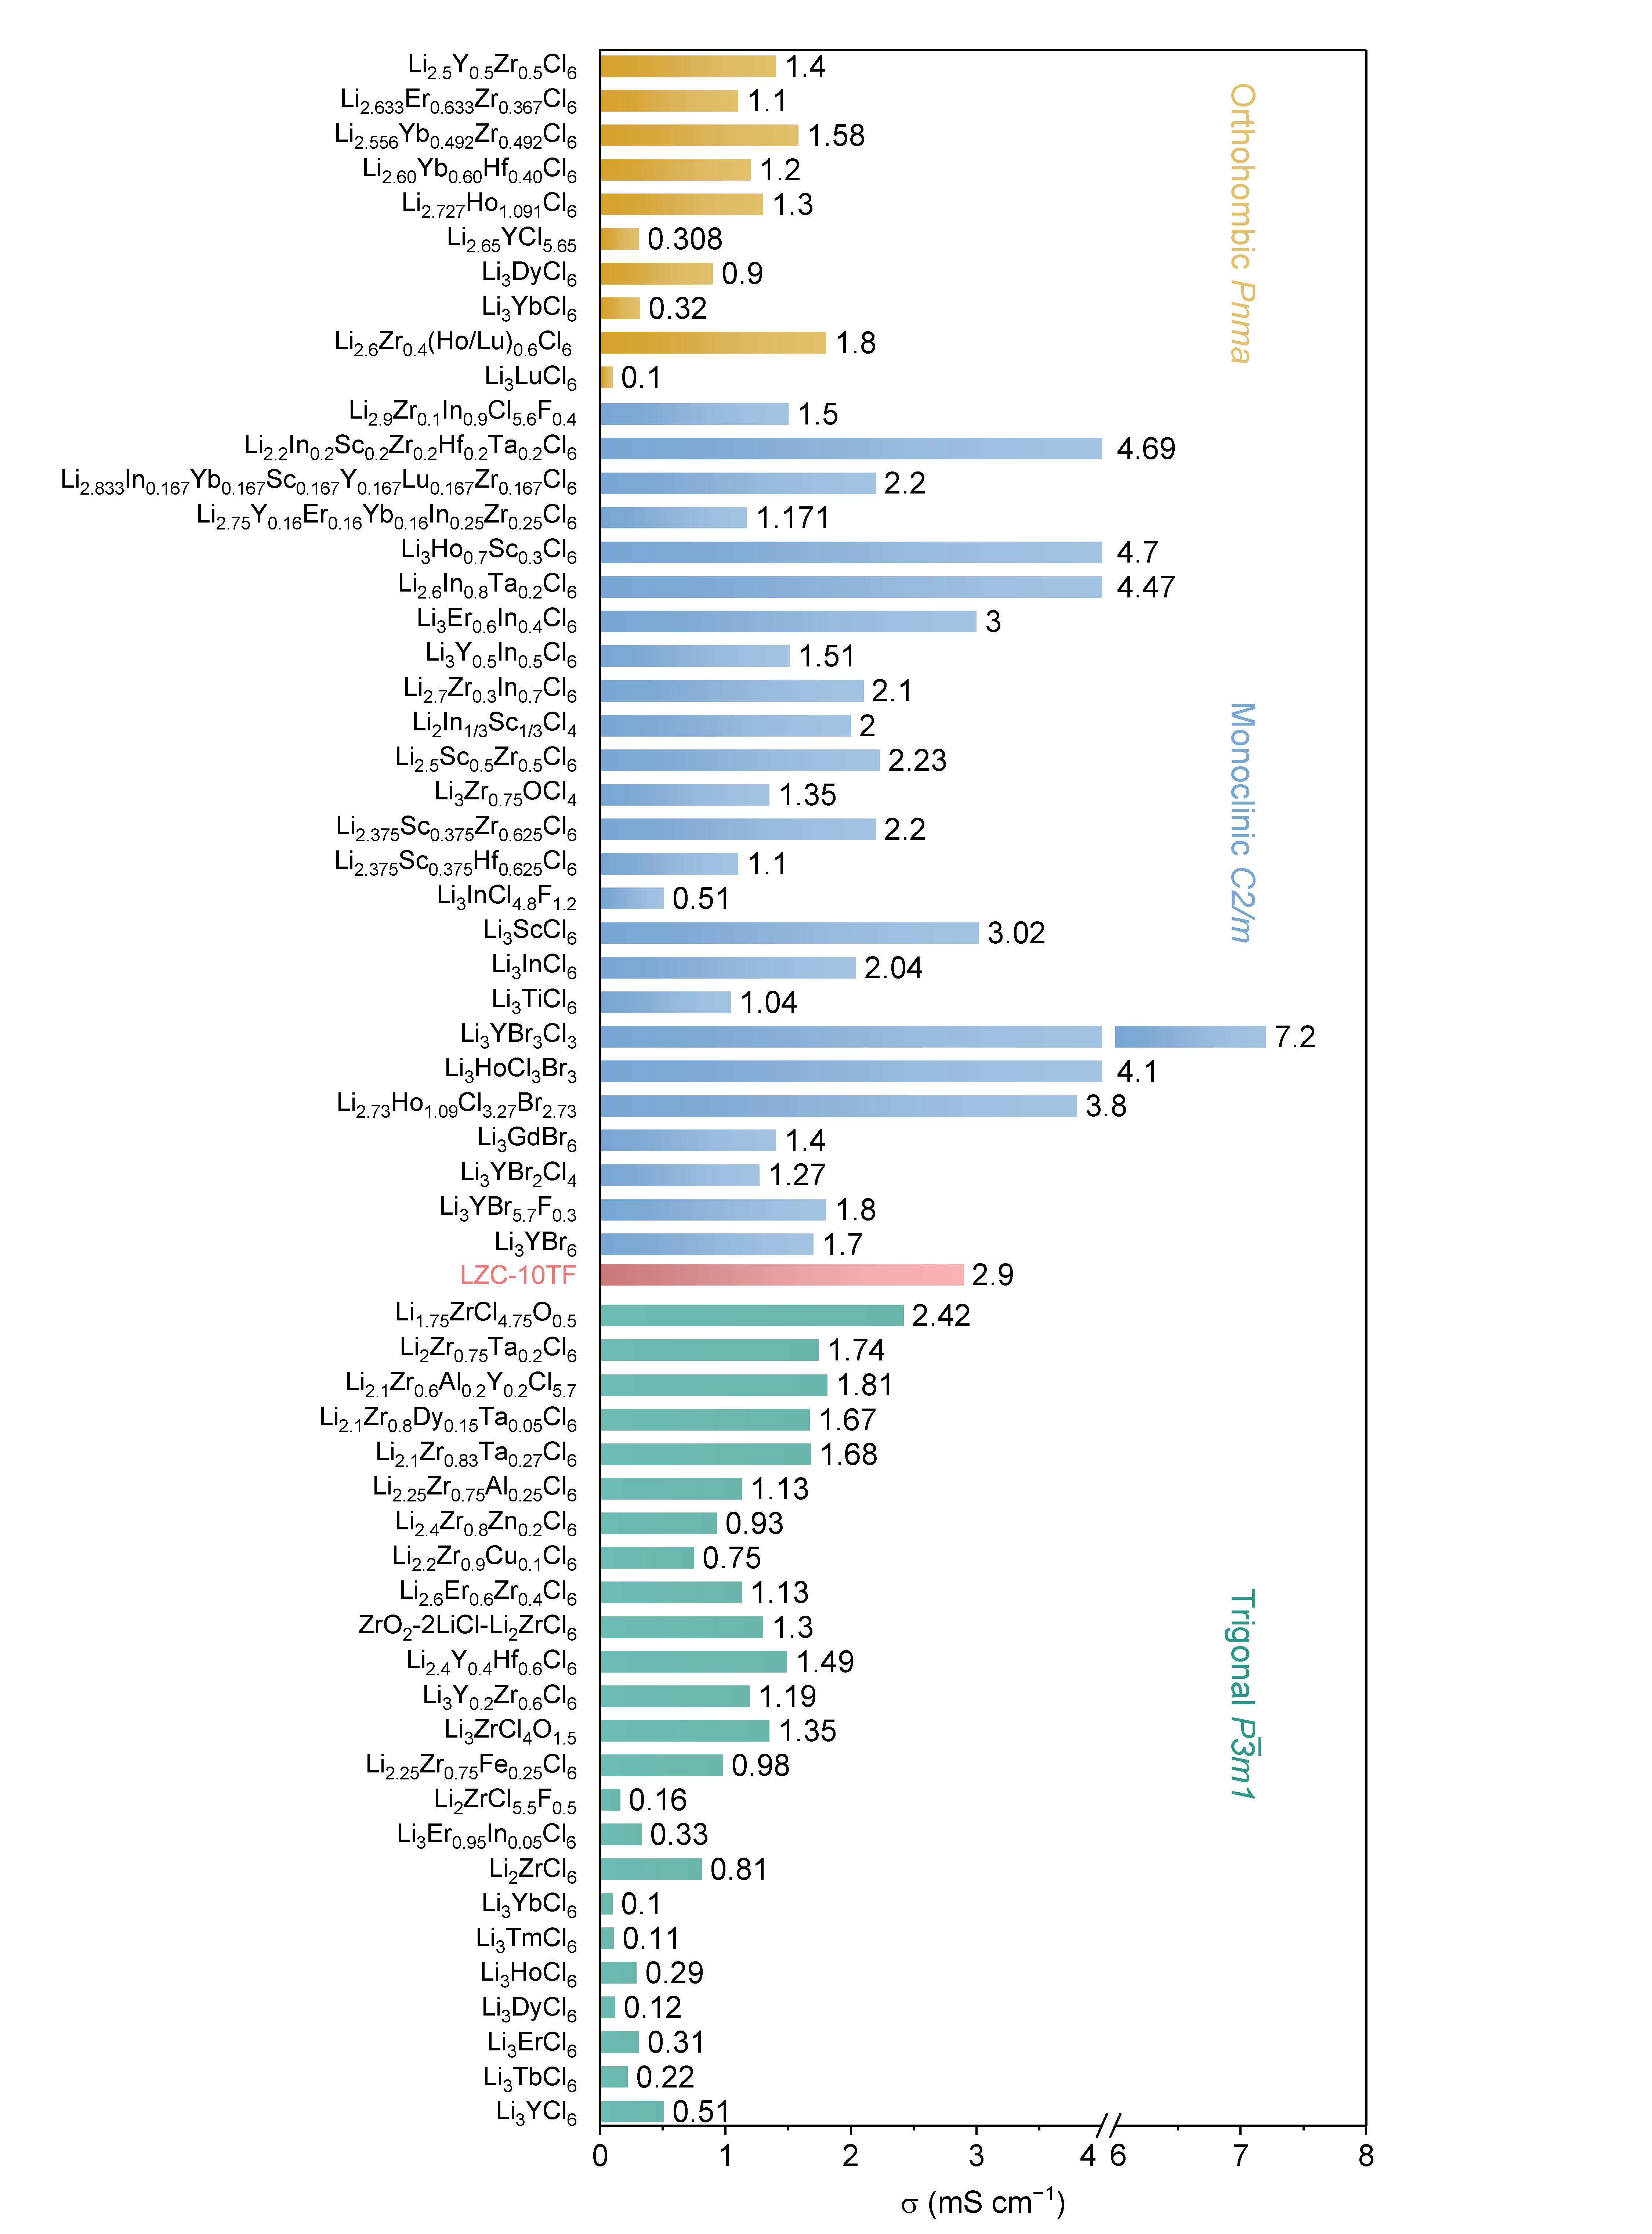


**Supplementary Fig. 14 |** Ionic conductivity comparison of the prepared LZC-10TF with previously advanced HSEs.


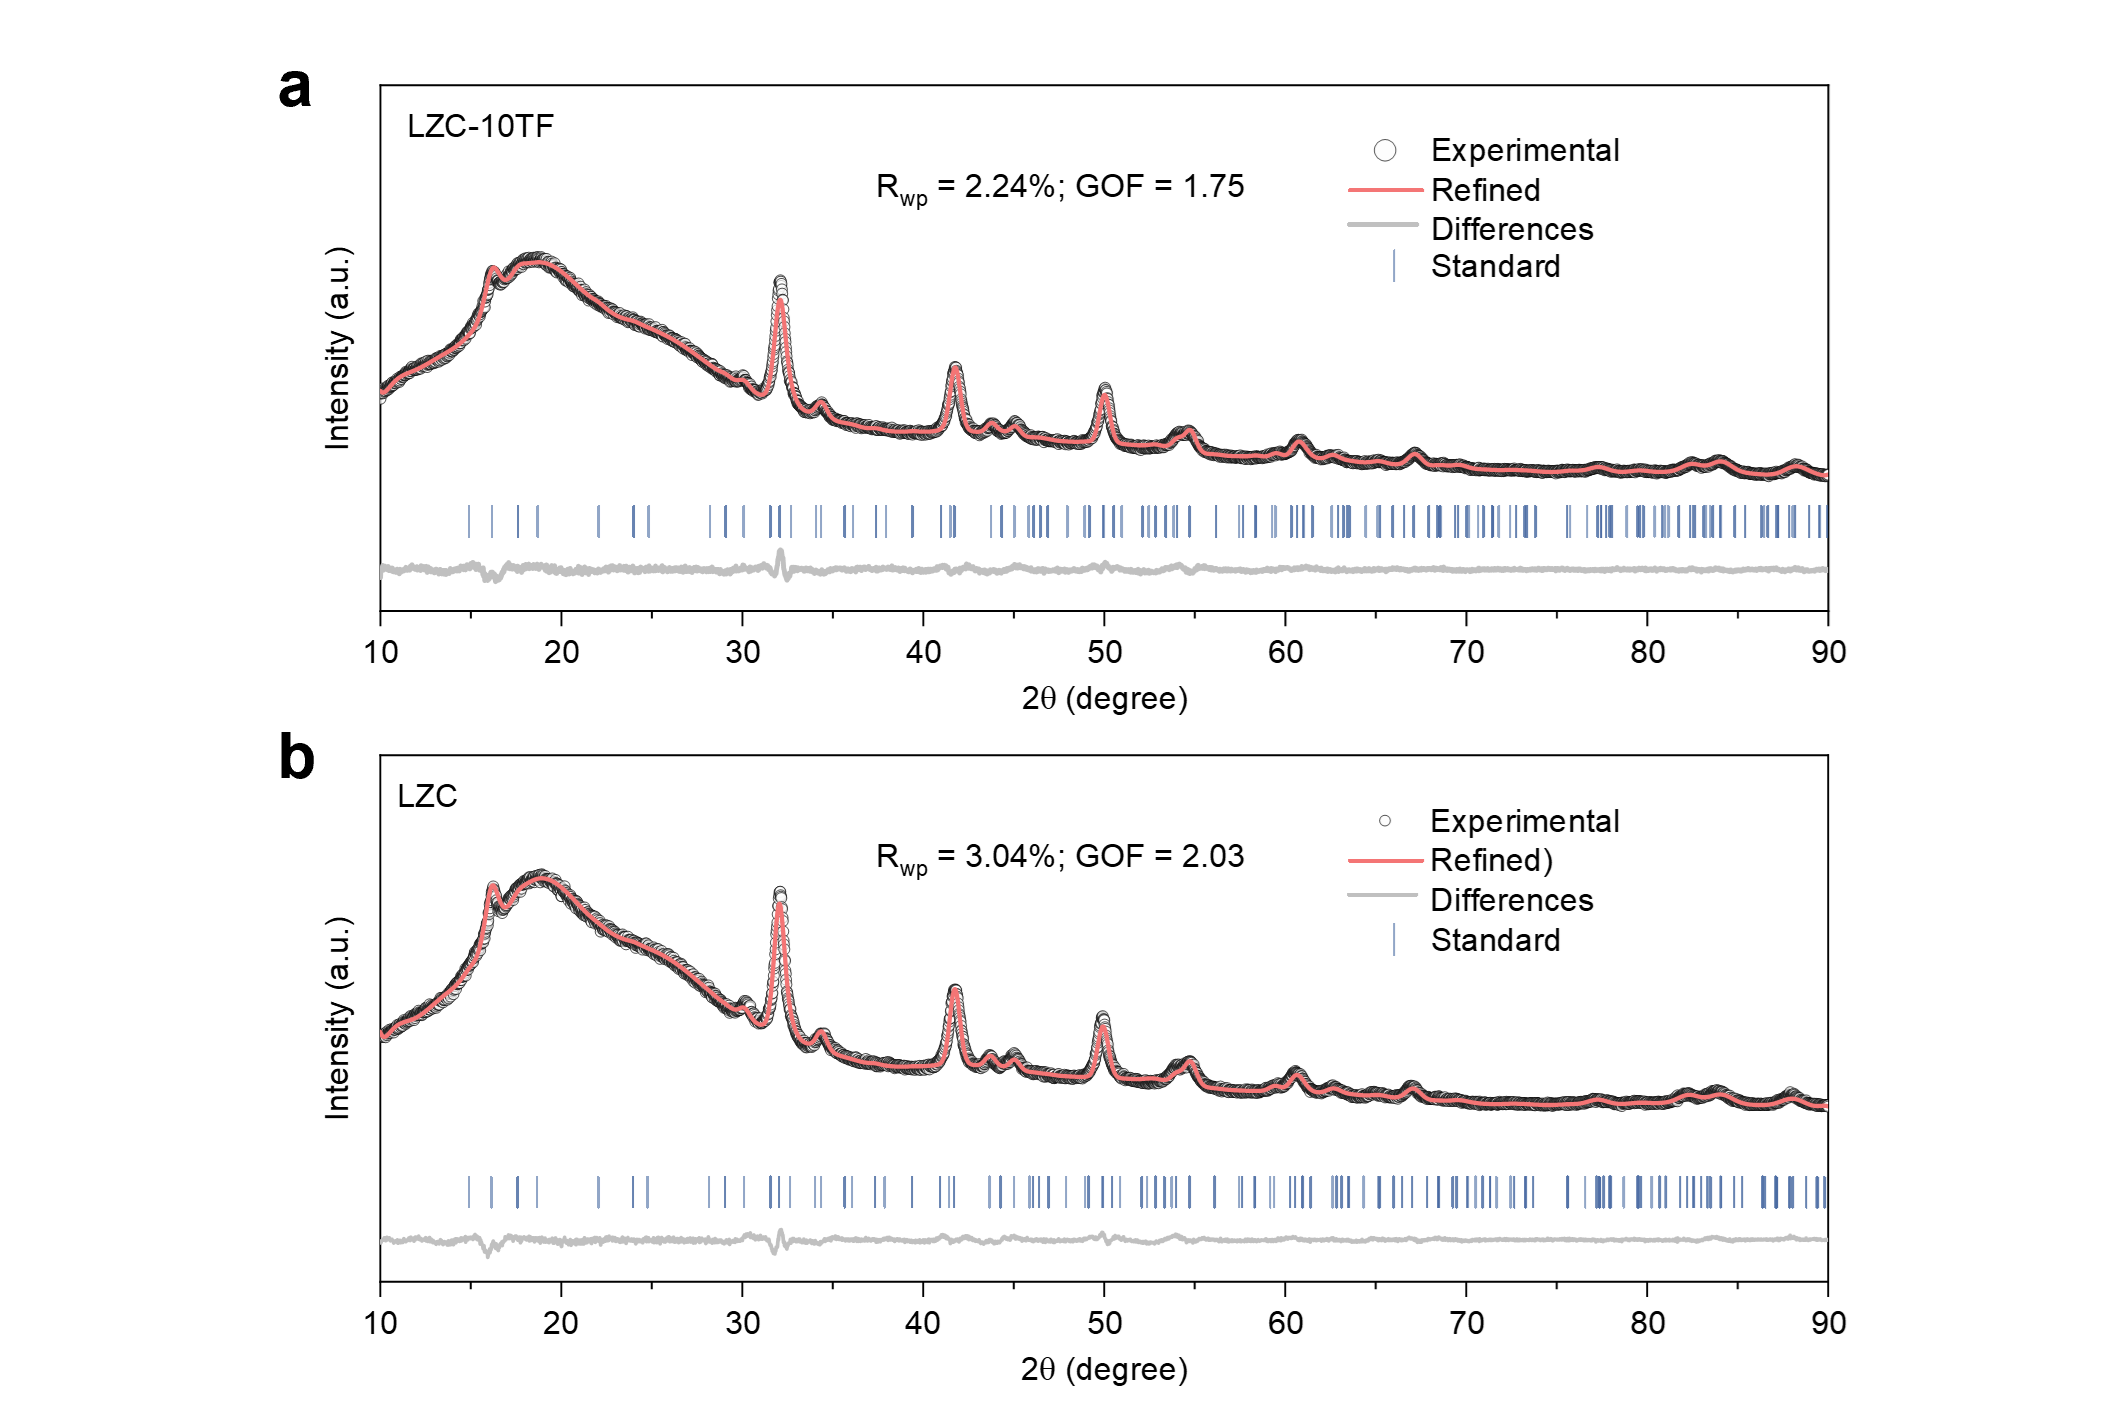


**Supplementary Fig. 15 | a,b** Rietveld refinement of the LZC-10TF (**a**) and LZC (**b**).

**Discussion:** The unit lattice parameters of the LZC-10TF (a = 10.9625 Å, c = 5.9256 Å; **Supplementary Fig. 15a** and **Table 2**) are smaller than those of LZC (a = 10.9737 Å, c = 5.9308 Å; **Supplementary Fig. 15b** and **Table 3**), which is consistent with the diffraction peaks of LZC-10TF shifting to higher angles.


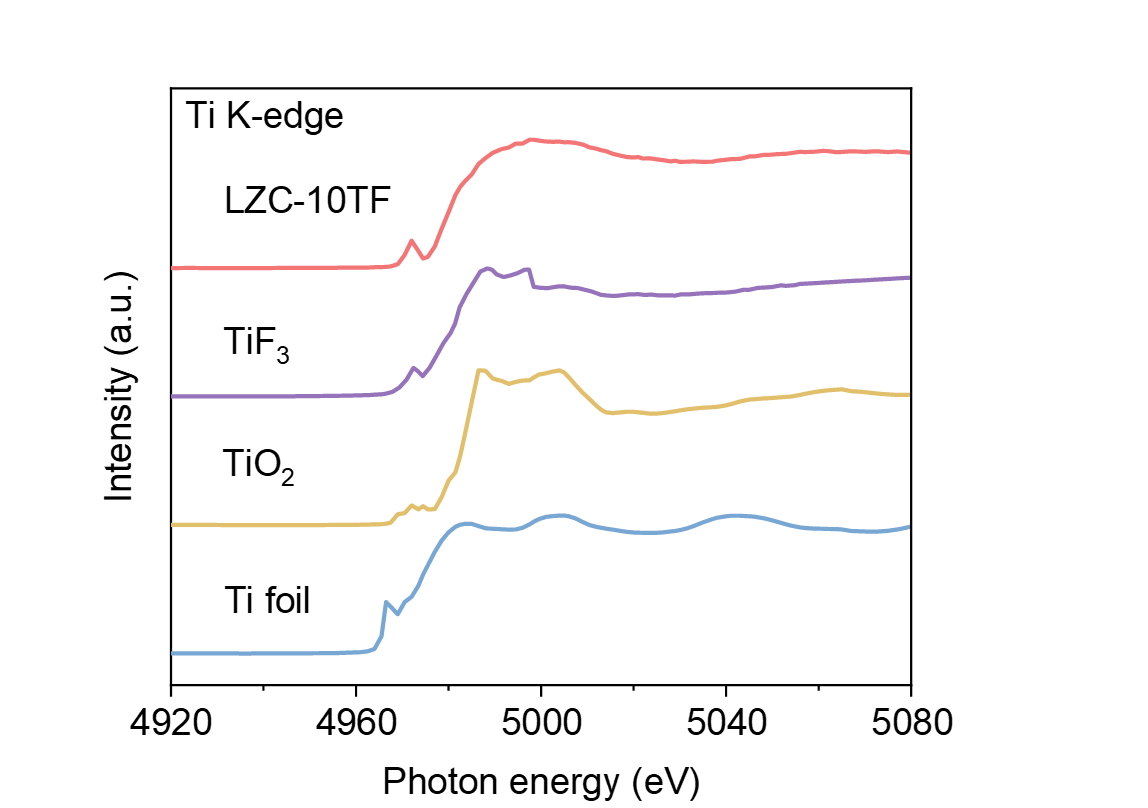


**Supplementary Fig. 16 |** Normalized XANES spectra of Ti K-edge for TiF3 and LZC-10TF.

**
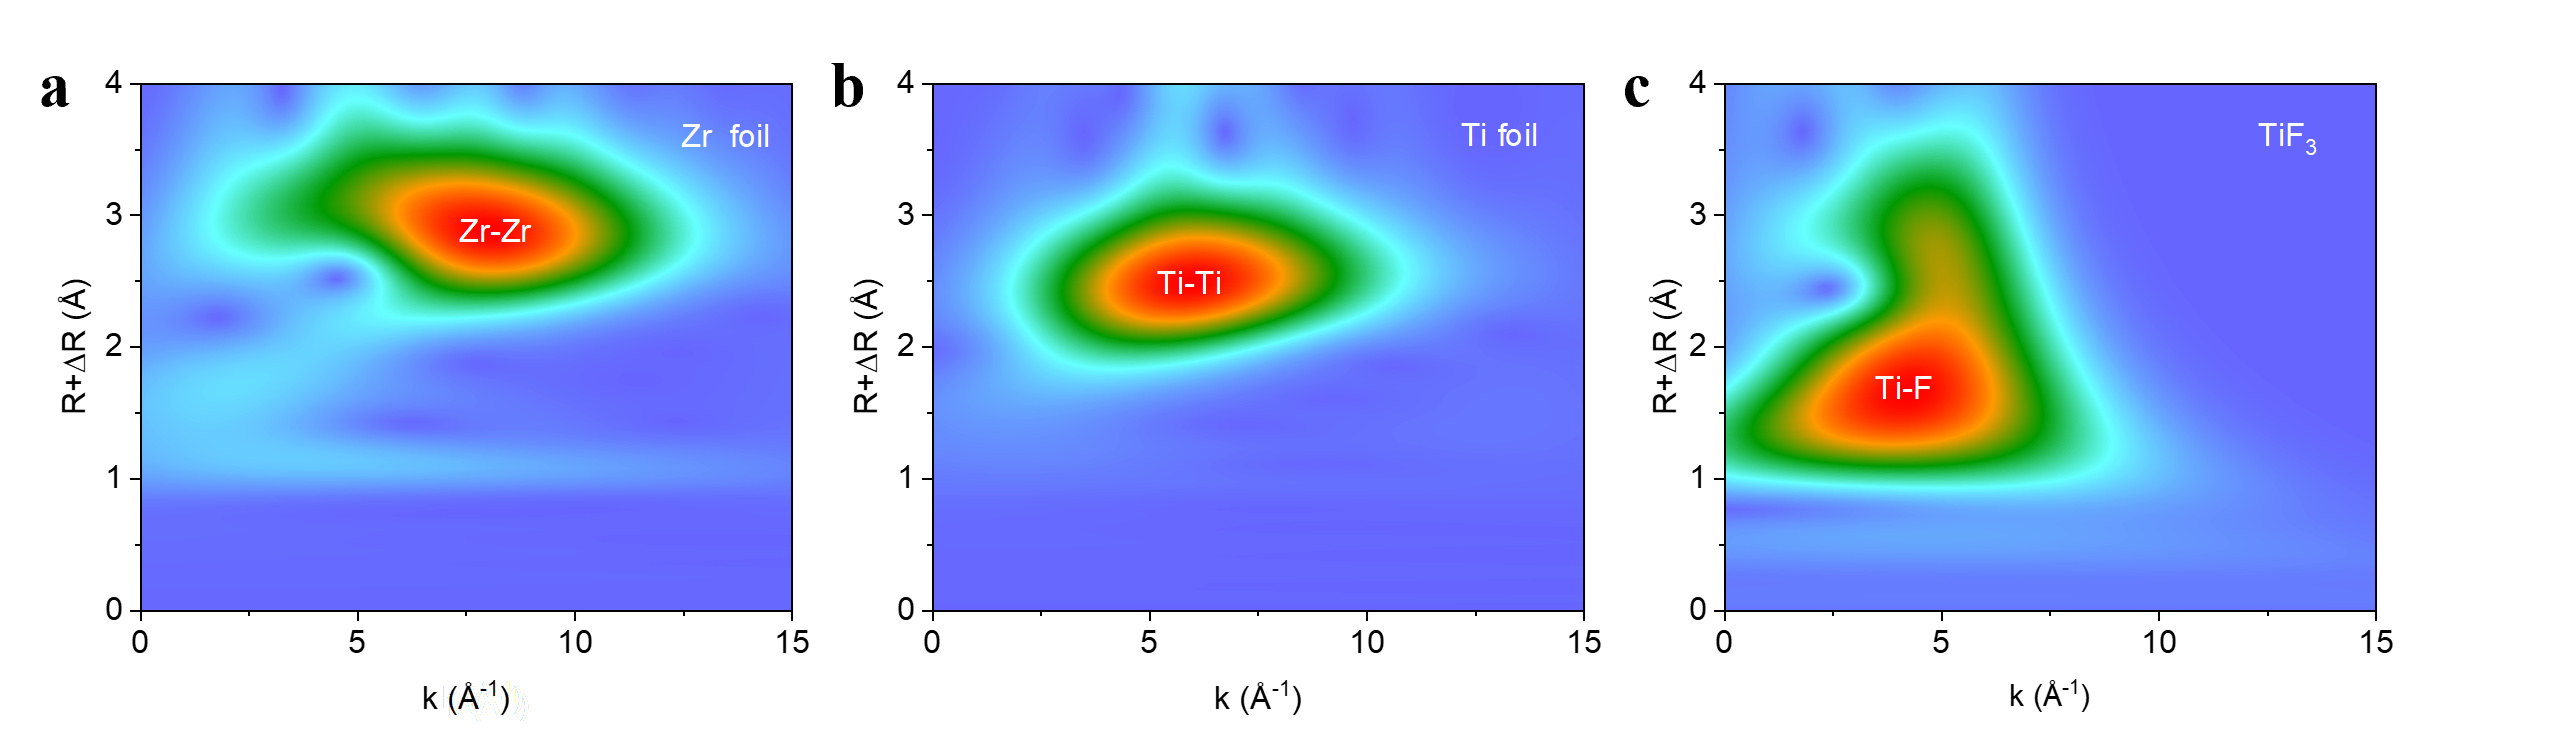
**

**Supplementary Fig. 17 | a** WT for the k3-weighted Zr K-edge EXAFS signals of the Zr foil. **b,c** WT for the k3-weighted Ti K-edge EXAFS signals of the Ti foil (**b**) and TiF3 (**c**). For Wavelet Transform analysis, the χ(k) exported from Athena was imported into the Hama Fortran code3. The parameters were listed as follows: R-range, 0.0-4.0 Å, k-range, 0.0-15.0 Å−1 for the sample and Standards, and Morlet function with κ = 8, σ = 1 was used as the mother wavelet to provide the overall distribution.

**
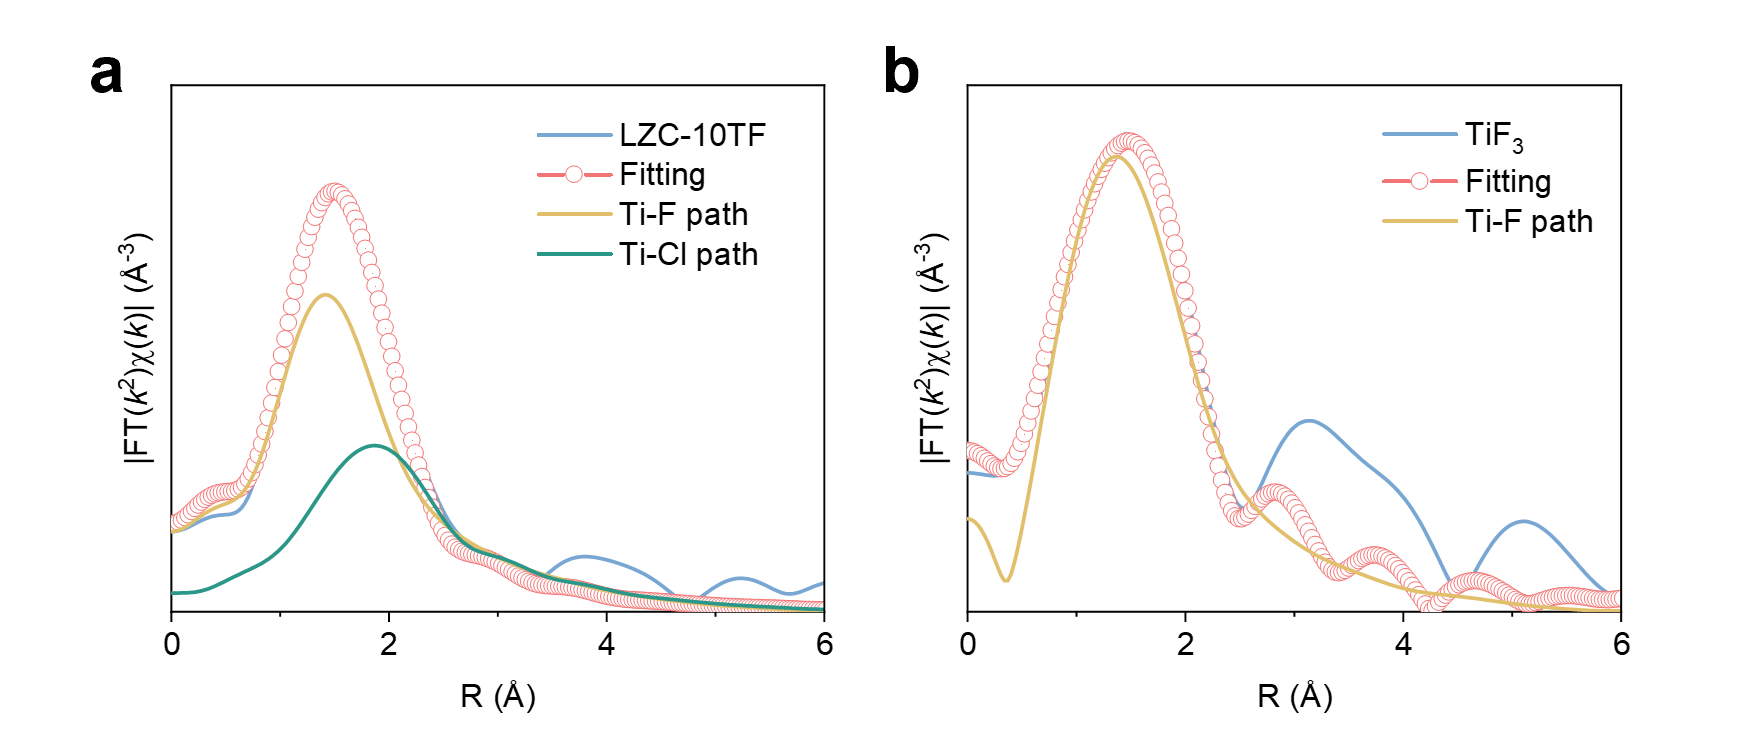
**

**Supplementary Fig. 18 | a,b** Ti K-edge EXAFS fitting curves at R space for LZC-10TF (**a**) and TiF3 (**b**). The XAFS data were processed according to the standard procedures using the Athena module implemented in the IFEFFIT software packages. The EXAFS spectra were obtained by subtracting the post-edge background from the overall absorption and then normalizing with respect to the edge-jump step. Subsequently, the χ(k) data were Fourier transformed to real (R) space using a Hanning window (dk = 1.0 Å−1) to separate the EXAFS contributions from different coordination shells. To obtain the quantitative structural parameters around central atoms, least-squares curve parameter fitting was performed using the ARTEMIS module of the IFEFFIT software packages4,5.

**
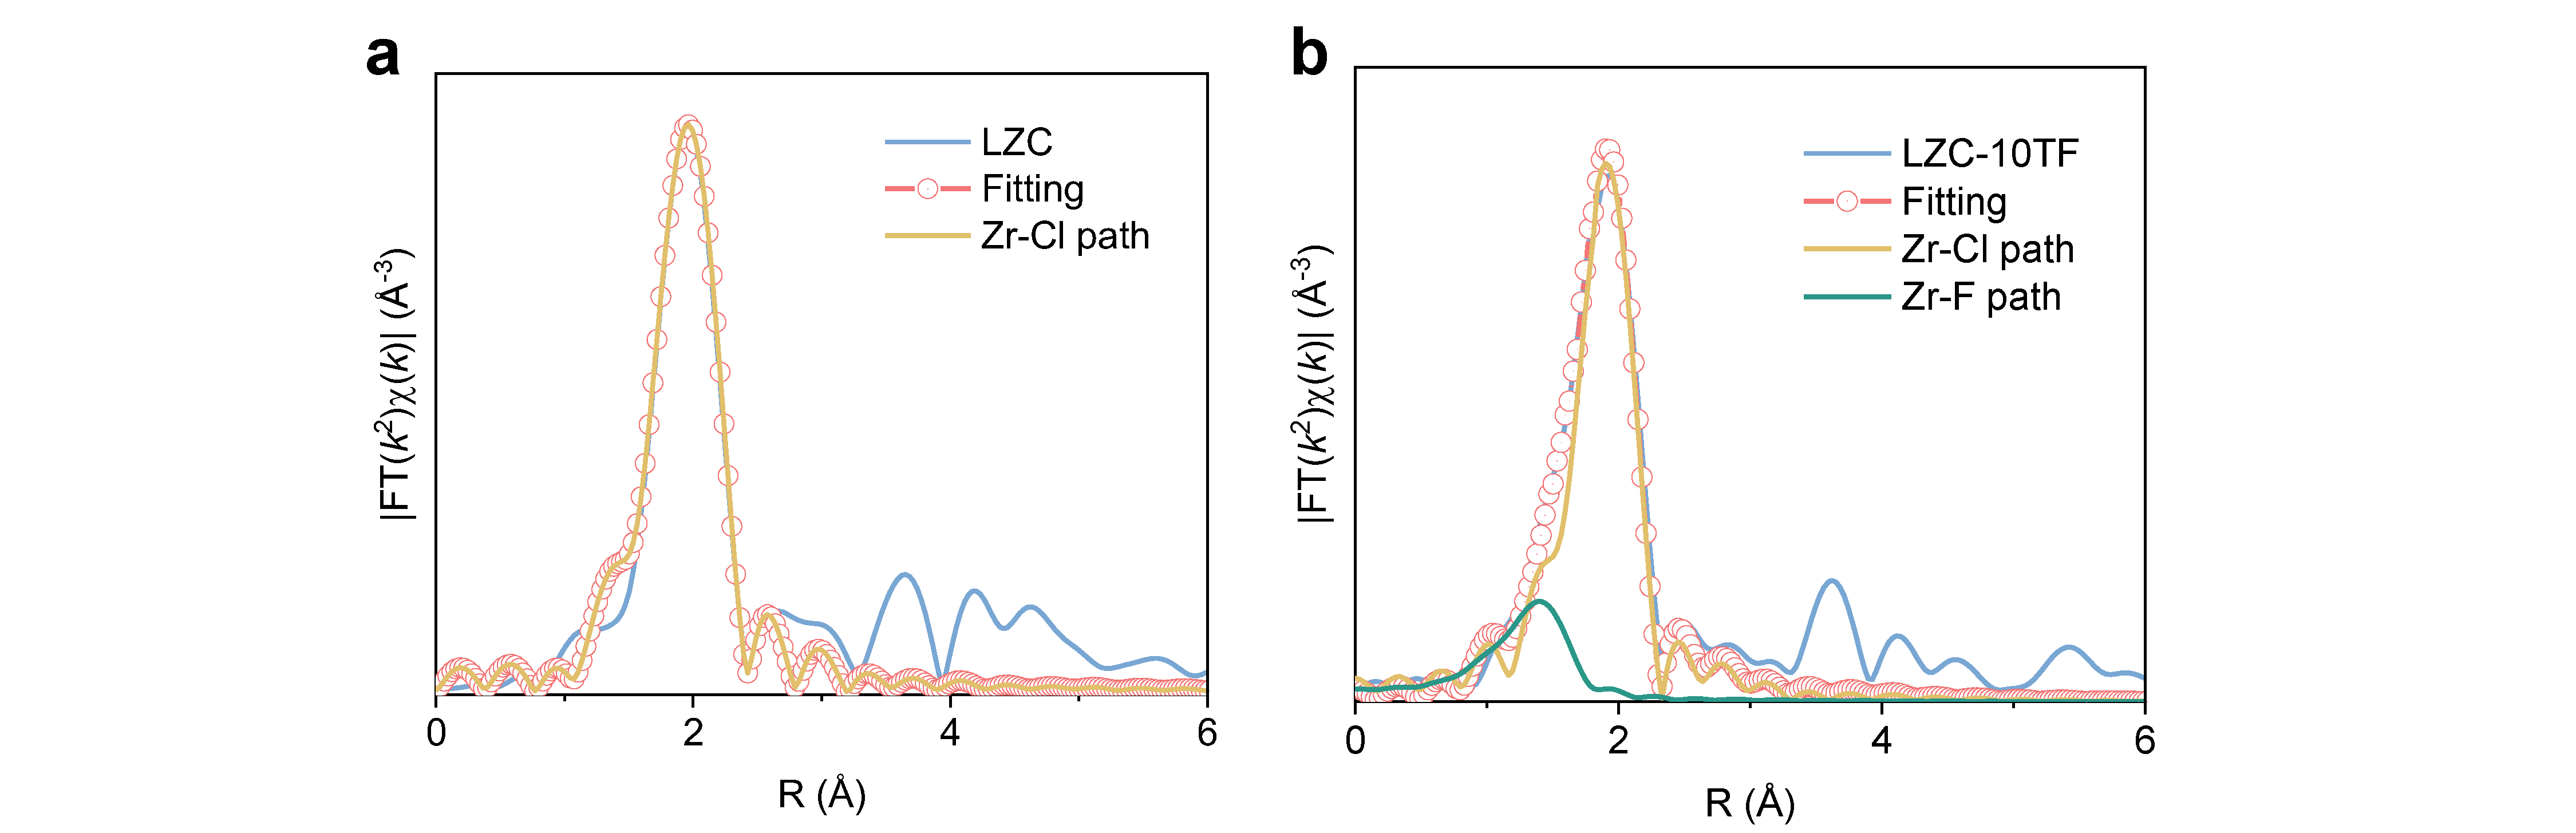
**

**Supplementary Fig. 19 | a,b** Zr K-edge EXAFS fitting curves at R space for LZC (**a**) and LZC-10TF (**b**). The EXAFS spectra were obtained by subtracting the post-edge background from the overall absorption and then normalizing with respect to the edge-jump step. Subsequently, the χ(k) data were Fourier transformed to real (R) space using a Hanning window (dk = 1.0 Å−1) to separate the EXAFS contributions from different coordination shells. To obtain the quantitative structural parameters around central atoms, least-squares curve parameter fitting was performed using the ARTEMIS module of the IFEFFIT software packages4,5.


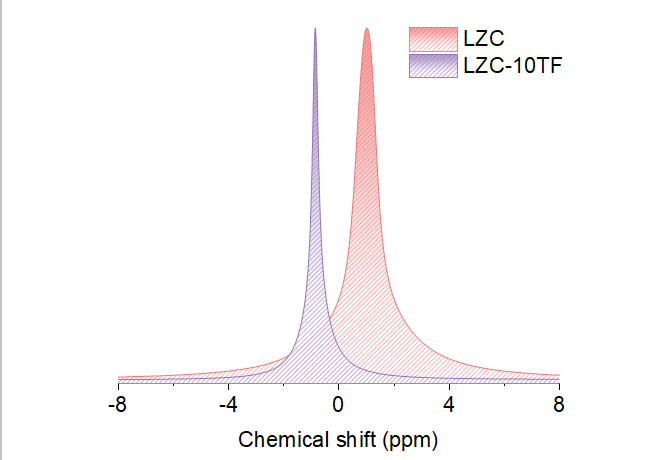


**Supplementary Fig. 20 |** 7Li MAS NMR spectra of LZC and LZC-10TF.


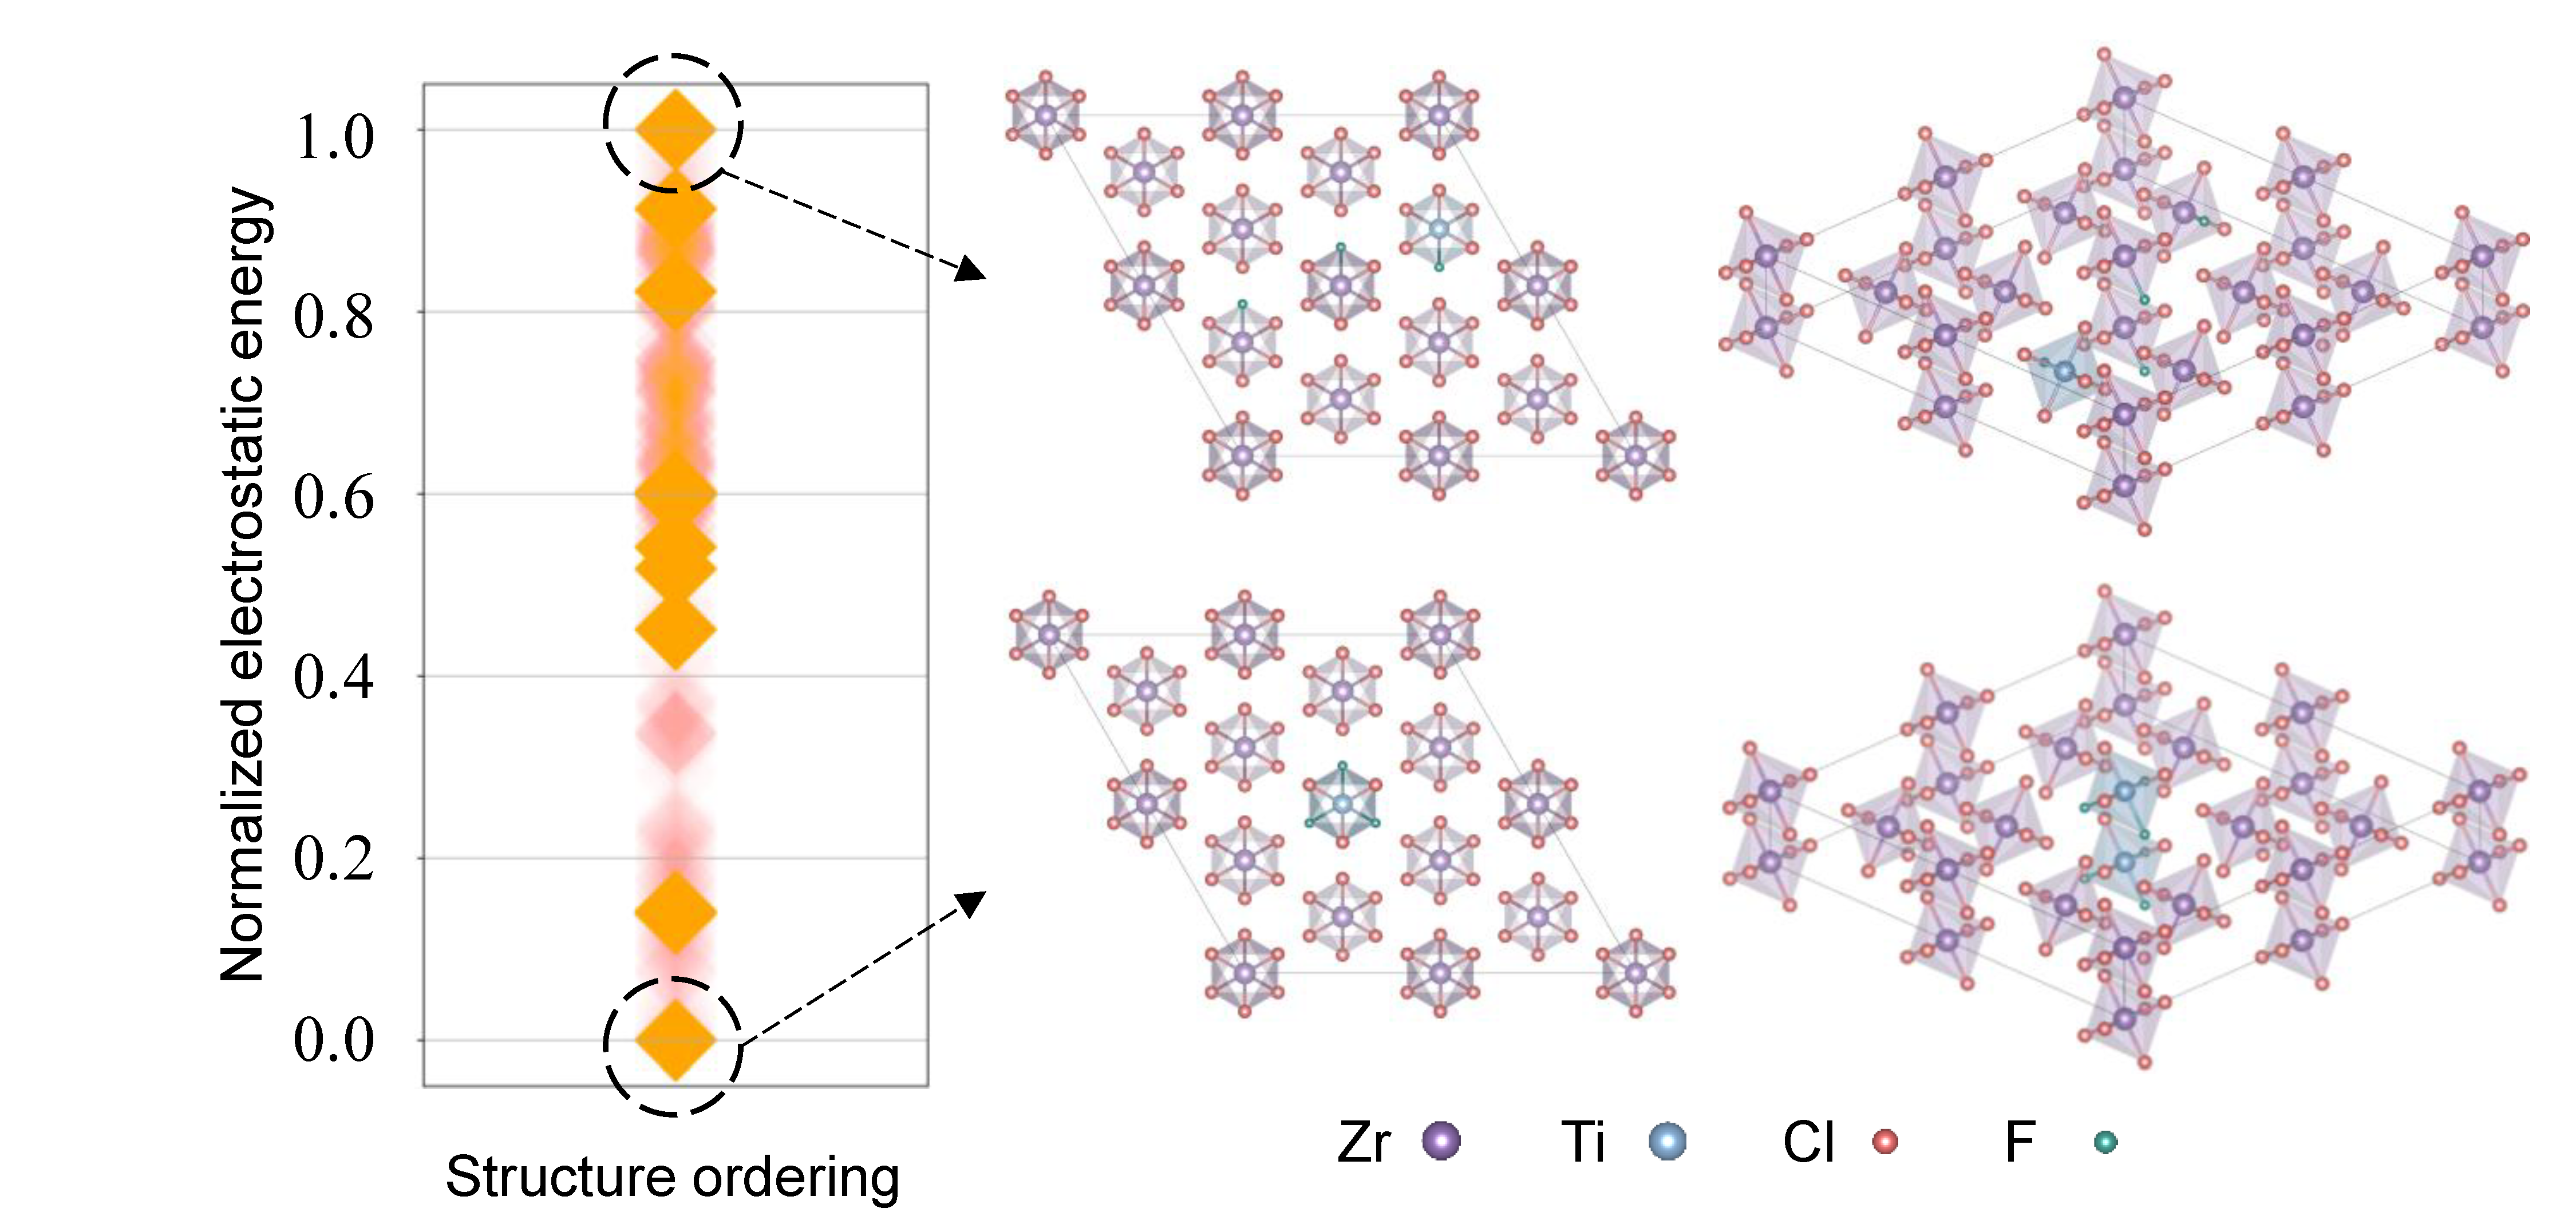


**Supplementary Fig. 21** **|** Normalized electrostatic energy of 25,764,480 Li-free configurations in the LZC-10TF supercell model is shown, with representative high-energy (upper) and low-energy (lower) structures. To reduce the number of possible combinations, a 2×2×1 supercell with a stoichiometry close to that of LZC-10TF (Li25Zr11TiF3Cl69) is constructed. Corresponding results of the relaxation of two structures (with Li ions removed for clarity) are provided. The structure with the lowest energy is selected for subsequent calculations.


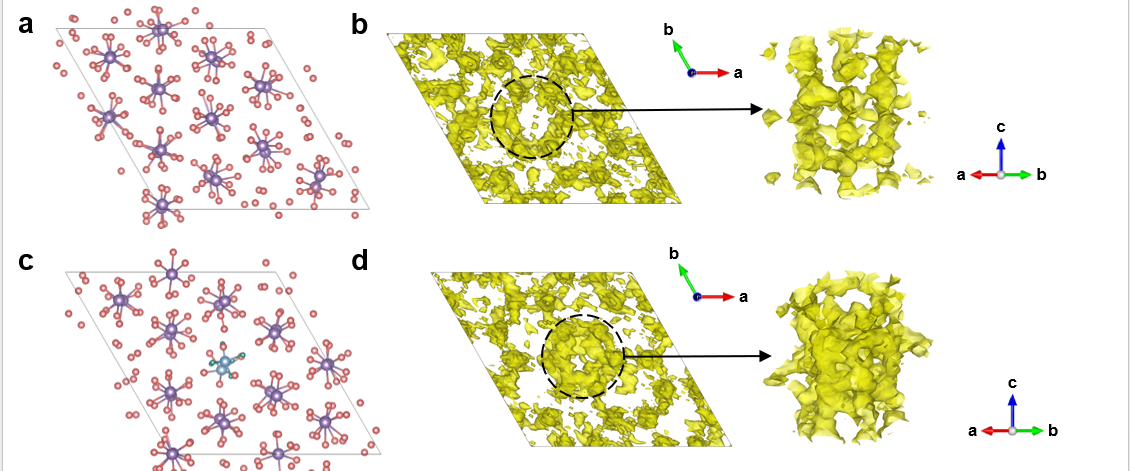


**Supplementary Fig. 22 | a,b** Crystal structure of LZC (**a**) superimposed with Li⁺ probability density (**b**) indicated by yellow iso-surfaces, based on 20 ps AIMD simulations at 1100 K. **c,d** Crystal structure of LZC-10TF (**c**) superimposed with Li⁺ probability density (**d**), also marked by yellow iso-surfaces, from 20 ps AIMD simulations at 1100 K. Li⁺ was removed for clarity. The positions of Zr and Ti indicate the stability of both pristine and doped LZC structures. The larger probability density iso-surfaces around Ti compared to those around Zr atoms demonstrate the enhancement of Li⁺ hopping in the *a-b* plane.

**Discussion:** To quickly compare the differences in migration pathways, short-term (20 ps) AIMD simulations at a high temperature (1100 K) were performed. The structure of LZC remained stable after doping, showing minimal deformation post-AIMD (**Supplementary Fig. 22a,c**). The probability density maps of LZC and LZC-10TF show significant differences around the [TiCl6] and [TiF6] octahedra. In pristine LZC, the [ZrCl6] displays discrete density iso-surfaces, indicative of poor conduction in the *a-b* plane (**Supplementary Fig. 22b**). Conversely, the doped [TiF6] presents continuous hexagonal pathways that enhance conduction in the *a-b* plane (**Supplementary Fig. 22d**).


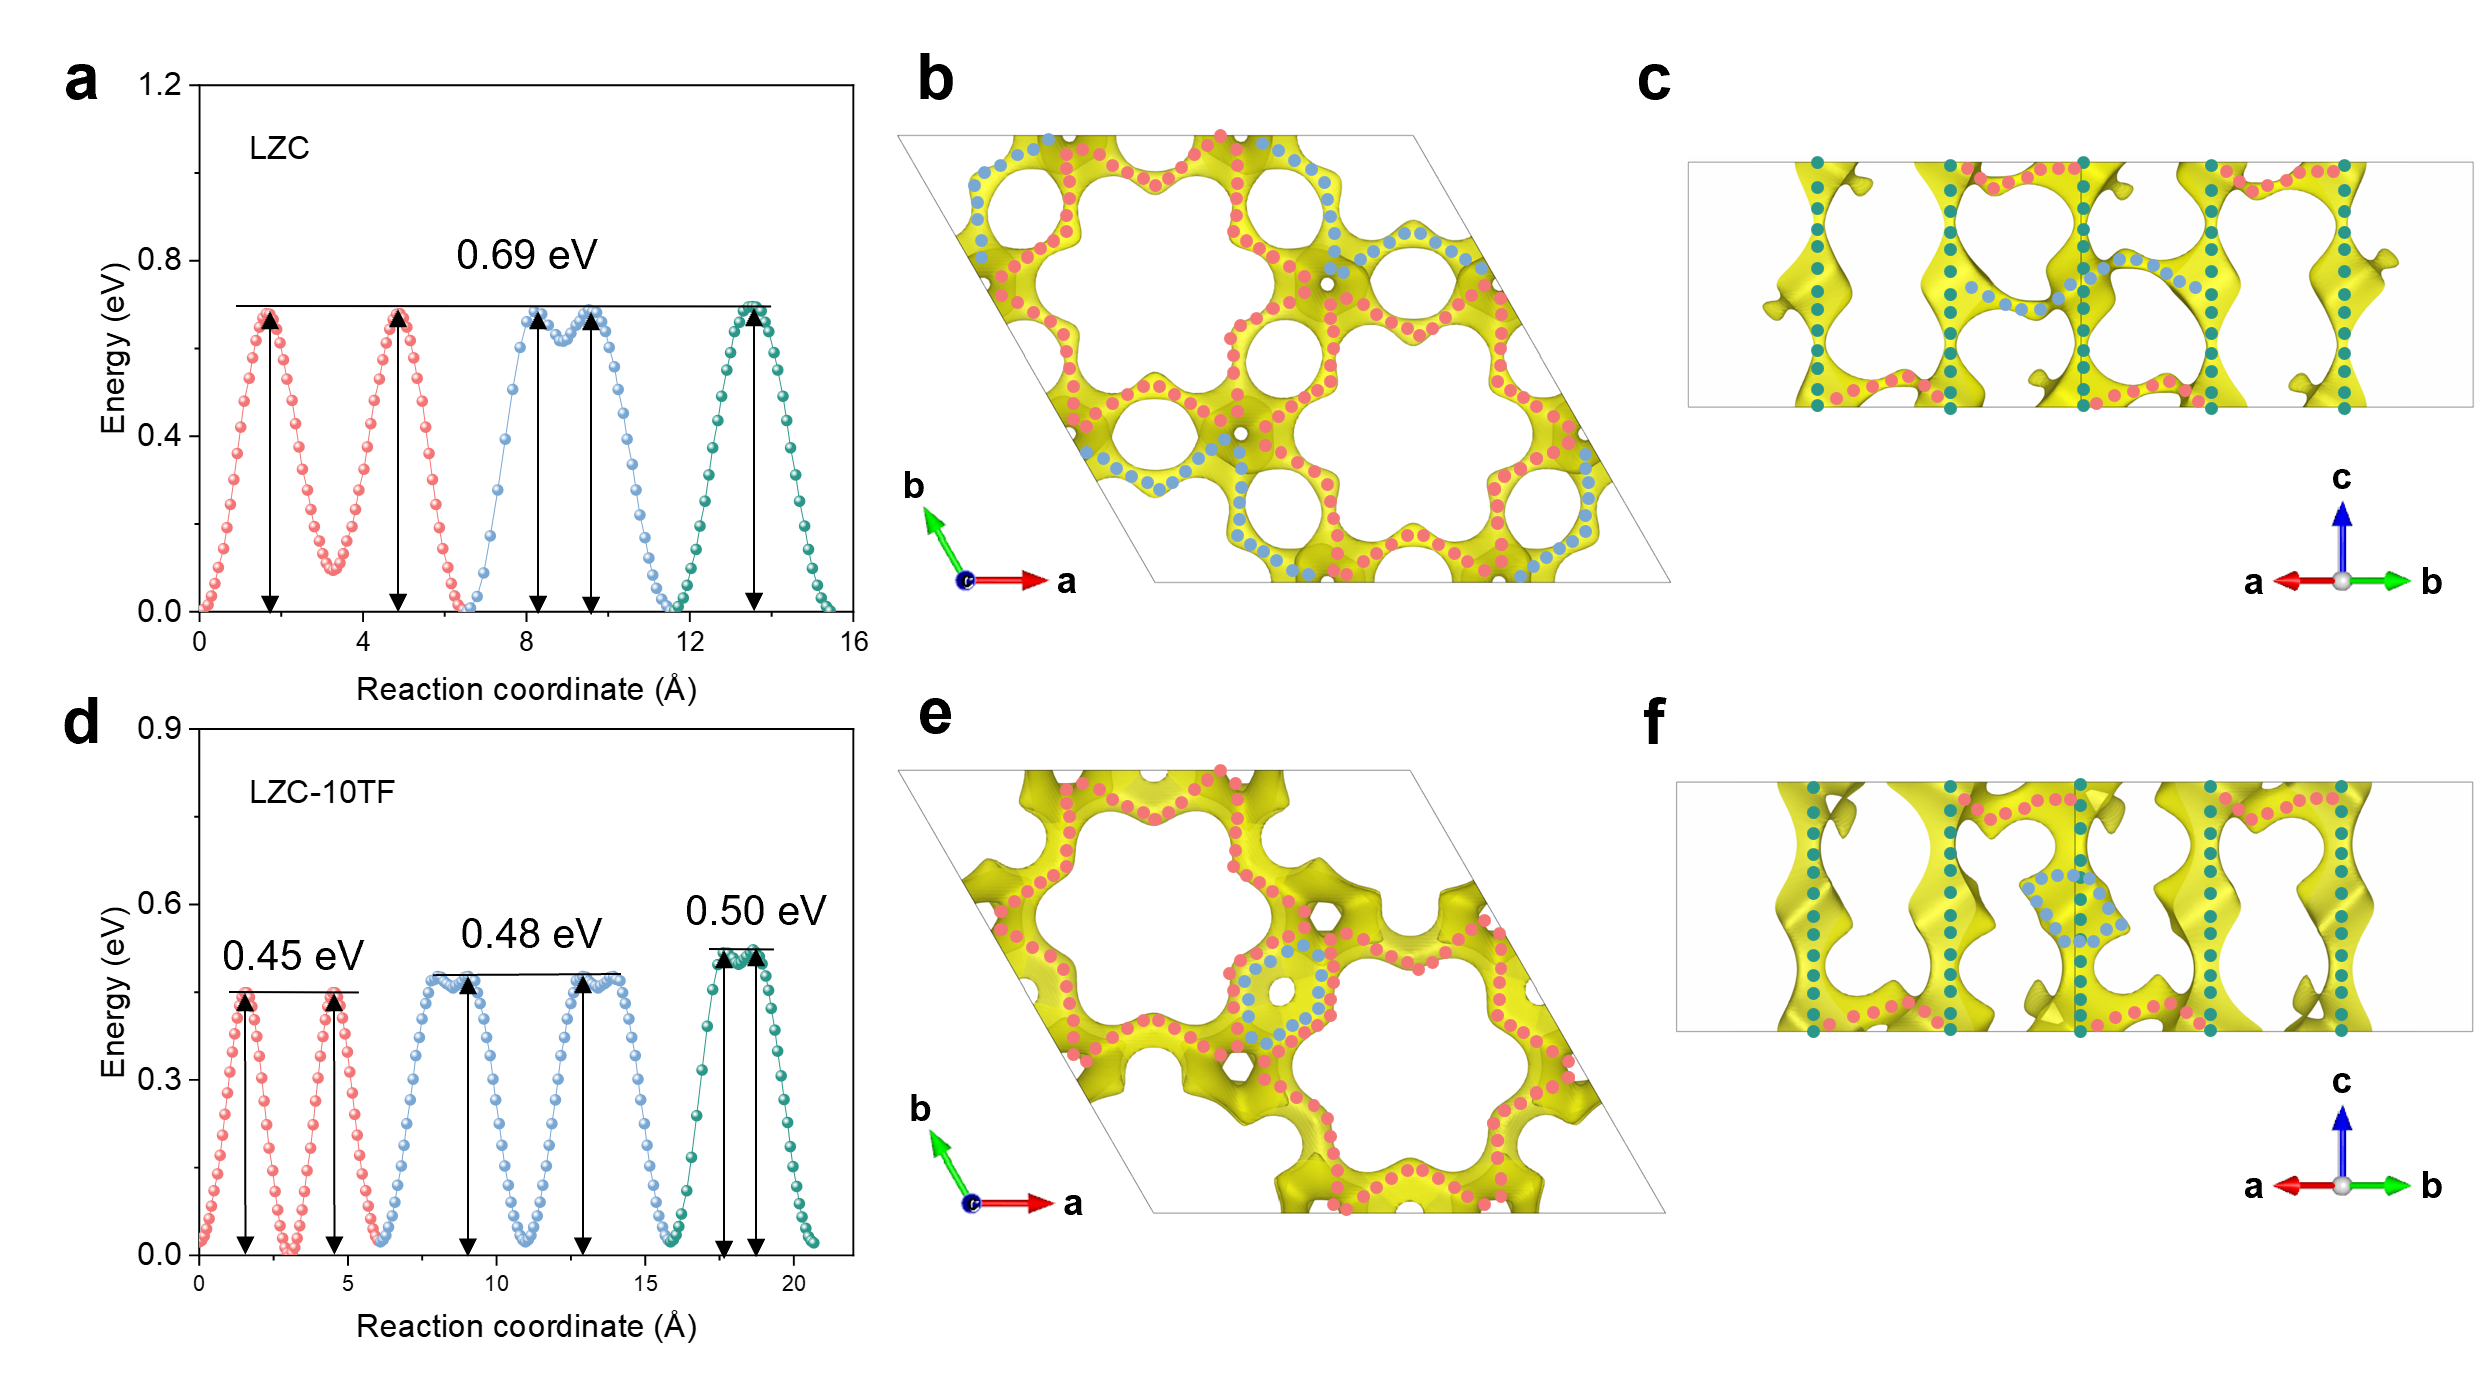


**Supplementary Fig. 23 | a,d** The energy landscape of LZC (**a**) and LZC-10TF (**d**) calculated using the BVSE method is shown. **b,c,e,f** The energy isosurfaces and migration pathways for LZC (**b,c**) and LZC-10TF (**e,f**) are presented, which are consistent with the results obtained from CINEB calculations.

**Discussion:** The decrease in energy barriers is also observed in BVSE calculations, with LZC at 0.69 eV and LZC-10TF at 0.45 eV (**Supplementary Fig. 23a,d**). The iso-surfaces of BVSE are depicted to illustrate the migration pathways, and the directions of migration are marked consistently across BVSE landscapes (**Supplementary Fig. 23b-c and e-f**). It is worth noting that the discrepancies in energy barrier between the CINEB and BVSE results arise from the intrinsic differences between the two approaches: CINEB provides accurate energy barriers based on DFT calculations along well-defined migration paths, whereas BVSE offers a rapid, semi-empirical estimation of the ionic migration landscape.


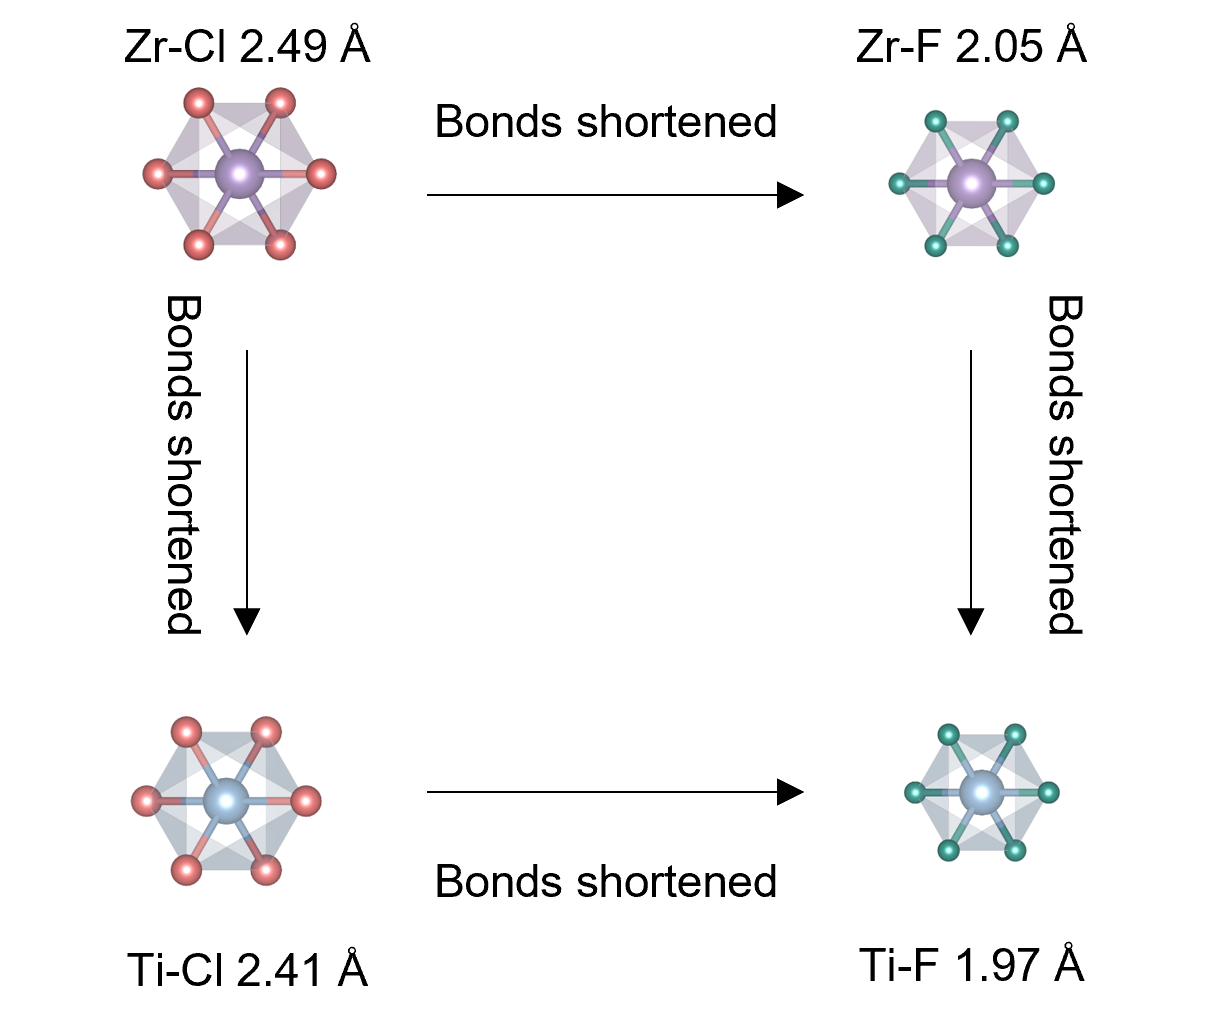


**Supplementary Fig. 24 |** Comparison of bond lengths of Ti-Cl, Zr-Cl, Ti-F, and Zr-F.

**Discussion:** After relaxation, doping-induced structural modifications were observed: the Zr-Cl bond length shortens from 2.49 Å to 2.41 Å upon substitution of Ti with Zr, and further decreases to 2.05 Å when Cl is substituted by F. Additionally, the Zr-F bond length shortens from 2.05 Å to 1.97 Å following substitution of Zr with Ti.


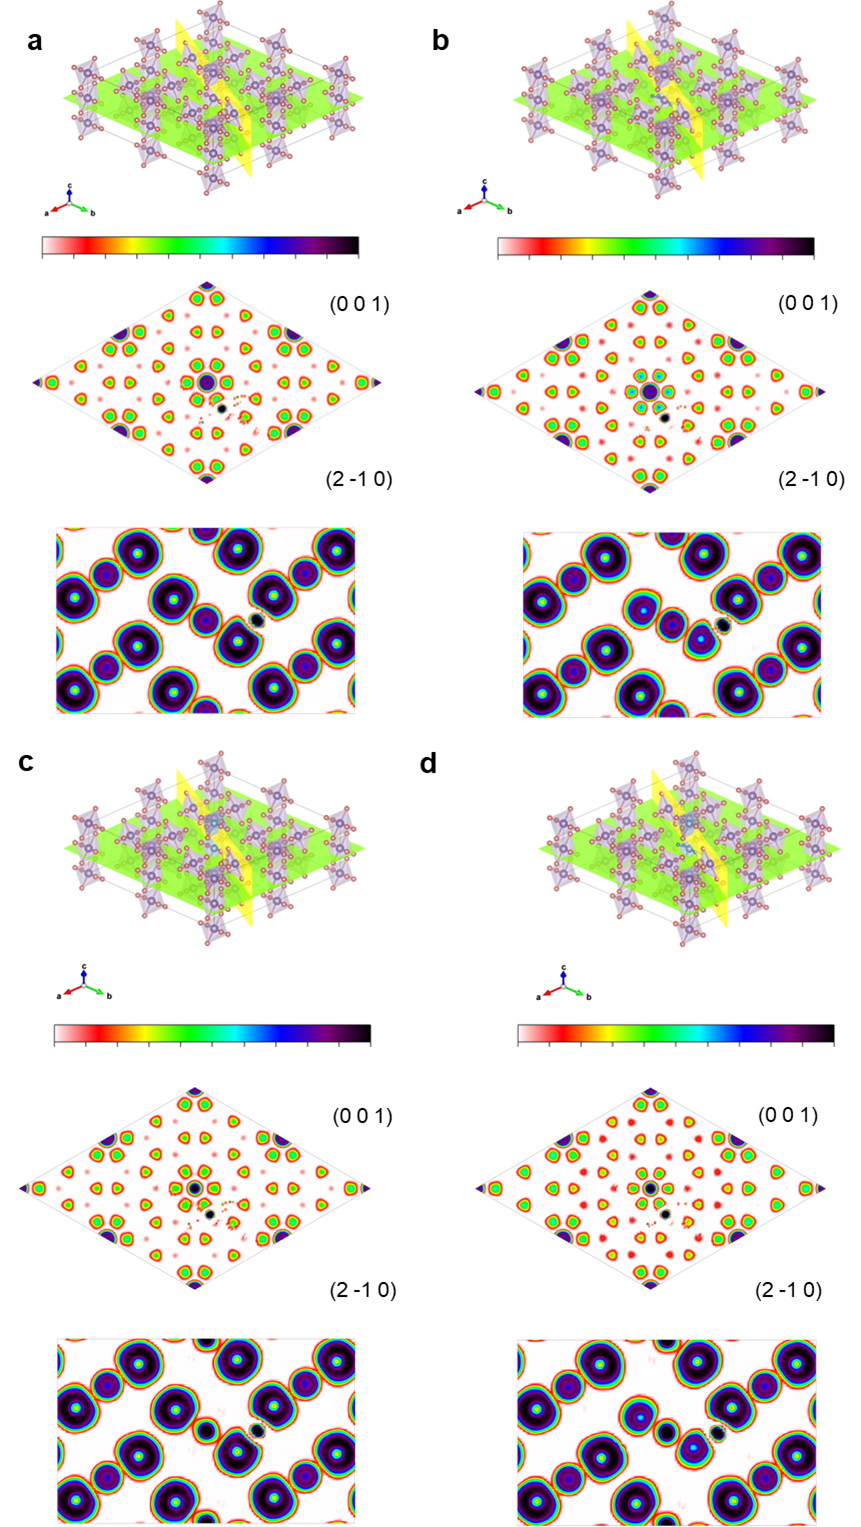


**Supplementary Fig. 25 | a-d** 2D plot of the electron localization function (ELF) for LZC (**a**), LZC-30F (**b**), LZC-10T (**c**), LZC-10TF (**d**) in the (001) plane, with a fractional coordinate of 0.5 along the *c*-axis. The blue color represents paired electrons, while red indicates the absence of electrons. After atom substitution, the bond type remains ionic, indicating that the bonding nature between M-X (M = Zr, Ti, Li; X = Cl, F) remains unchanged.


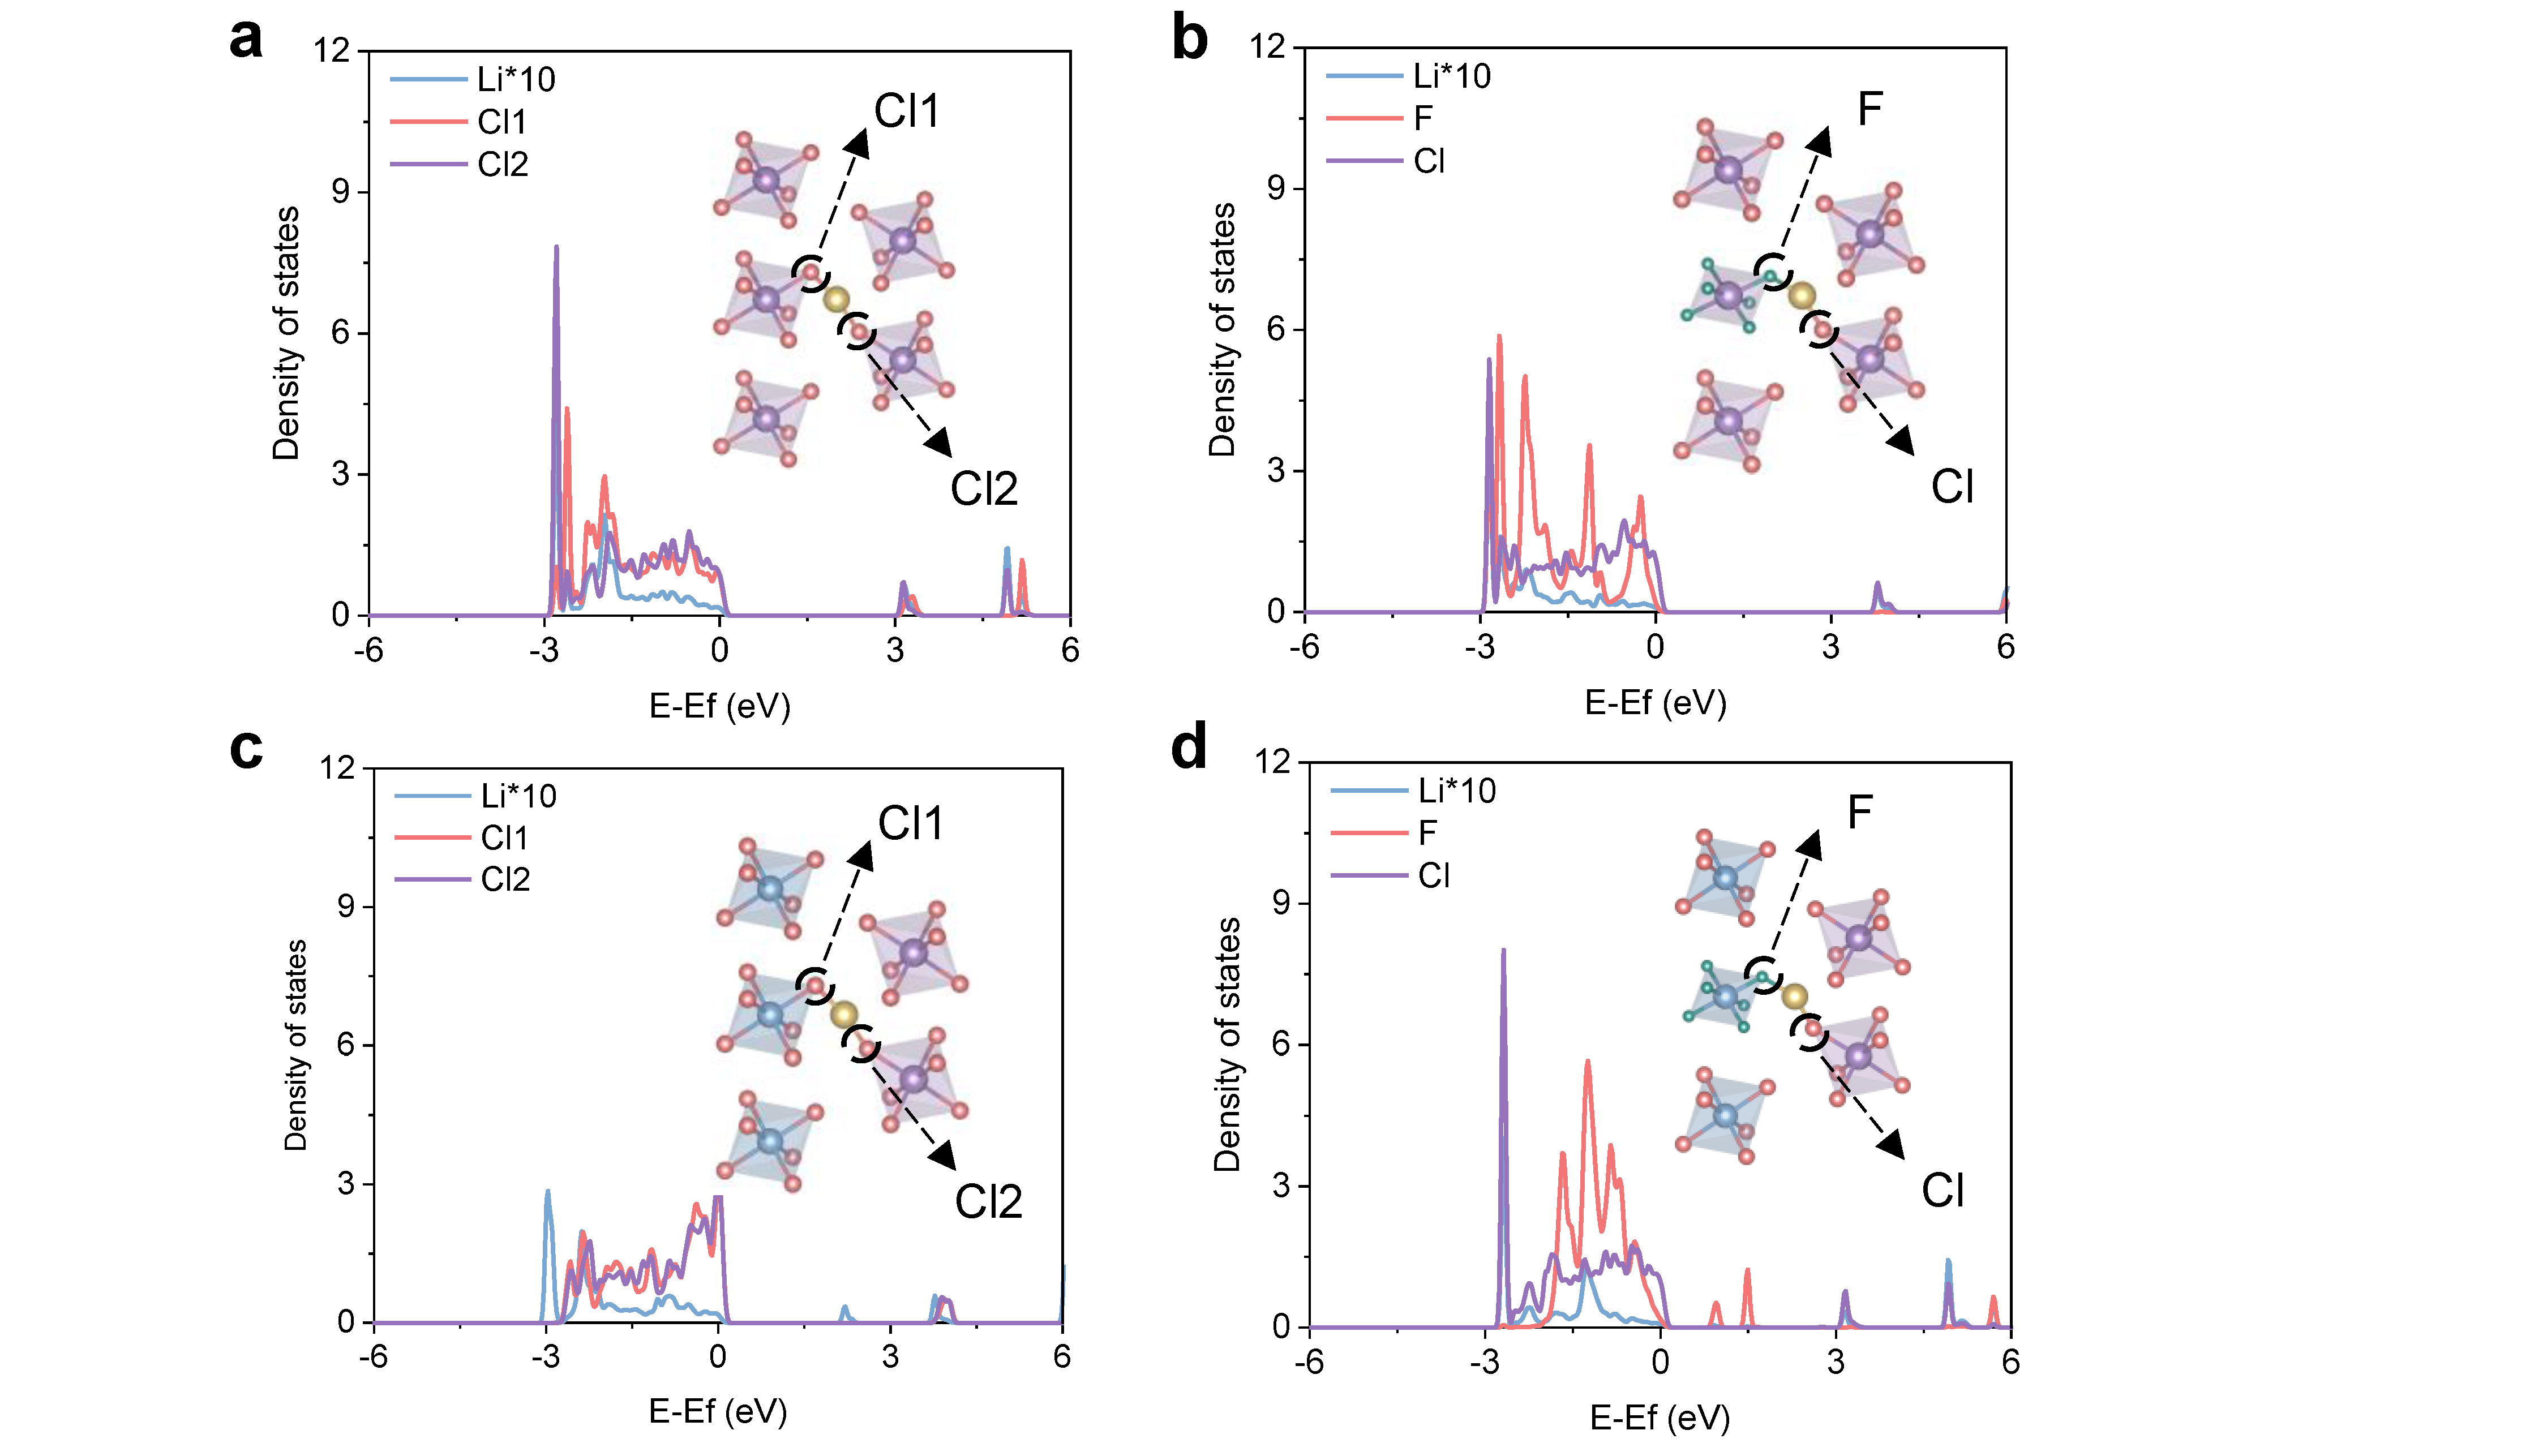


**Supplementary Fig. 26 | a-d** PDOS plots for Li⁺ and the nearby anions are shown: LZC (**a**), LZC-10T (**b**), LZC-30F (**c**), LZC-10TF (d). The overlapping regions represent hybridization peaks, which indicate the bond strength between Li⁺ and X (X = Cl, F). After substituting Cl with F, the hybridization peak becomes more pronounced and shifts to higher energy, suggesting that the interaction between Li⁺ and F is stronger. Upon substituting Zr with Ti, the peaks shift, reducing the overlap, which indicates a weaker interaction between Li⁺ and Cl. In LZC-10TF, the overlap is smaller than in LZC but larger than in LZC-30F.


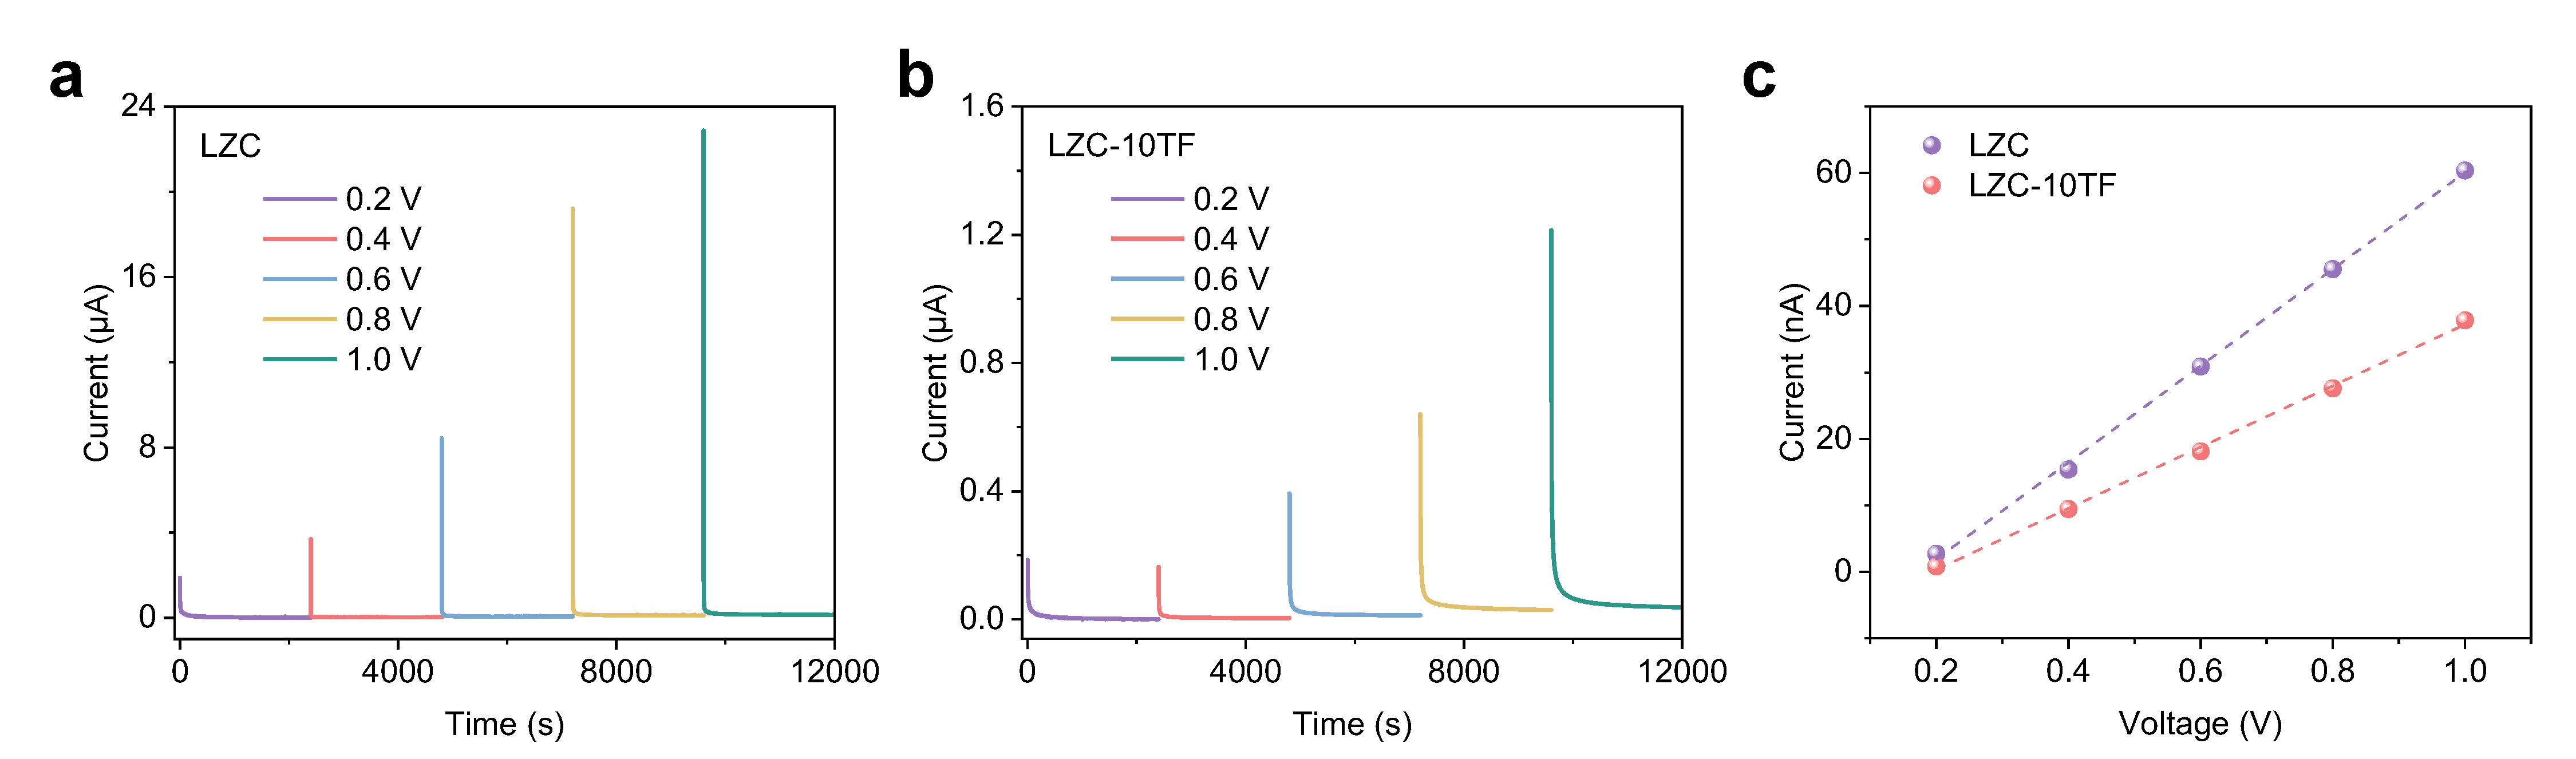


**Supplementary Fig. 27 | a**,**b** DC polarization curves of LZC (**a**) and LZC-10TF (**b**) using a symmetric cell configuration with different voltage biases from 0.2 to 1 V. **c** The electronic conductivity comparison of LZC and LZC-10TF.


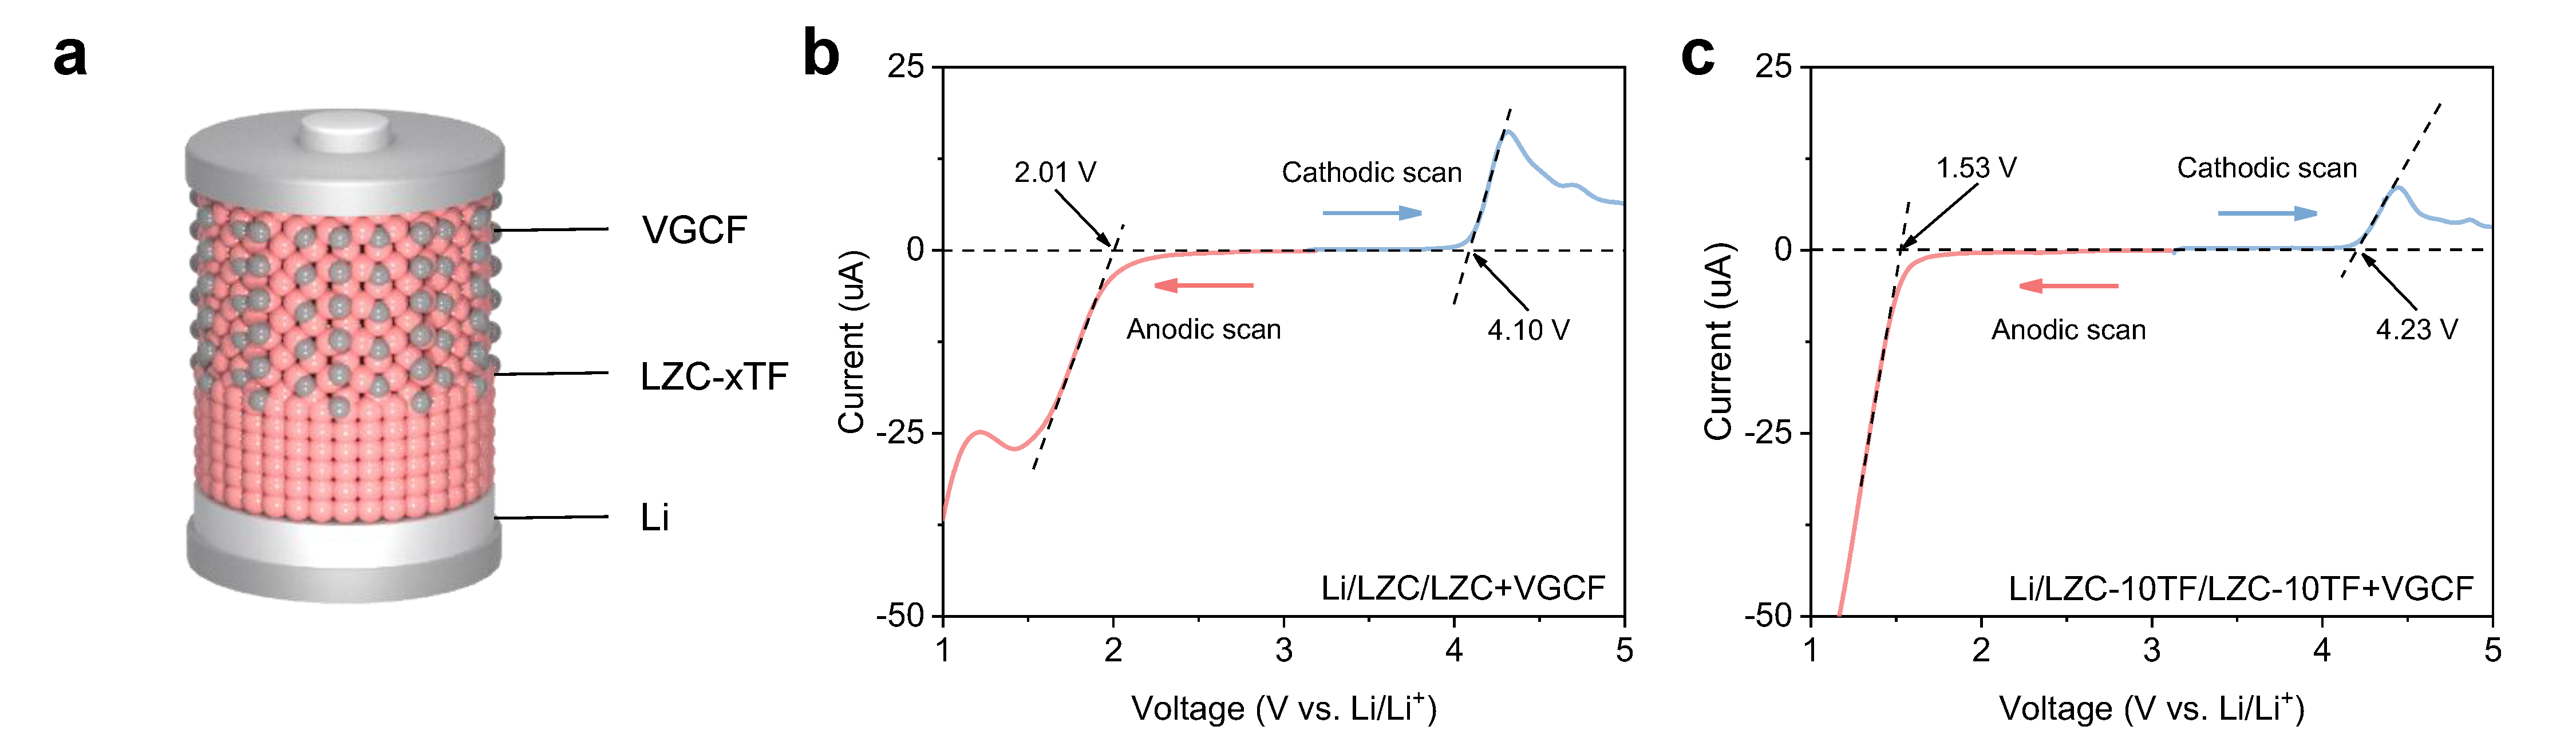


**Supplementary Fig. 28 | a** Schematic diagram of Li/LZC-xTF/LZC-xTF+VGCF cells. **b,c** LSV curves of Li/LZC/LZC+VGCF (**b**) and Li/LZC-10TF/LZC-10TF+VGCF (**c**) at 0.1 mV s−1.

**Discussion:** Based on previous studies (Supplementary Fig. 18 in Hong-Bin Yao*, et al., *Nature*, **2023**, 616, 77-83.; Figure S4a in Linda F. Nazar*, et al., *Energy Environ. Sci.*, **2020**, 13, 2056; Fig. 2d in Sung-Kyun Jung*, et.al., *ACS Energy Lett.* **2021**, 6, 2006−2015), the LSV curve (**Supplementary Fig. 28**) suggests stable electrochemical window of LZC-10TF to be 1.53 V to 4.23 V. Notably, this intrinsic stability range does not directly dictate the practical operating voltage of the battery, as a dynamic solid electrolyte interphase (SEI) or cathode electrolyte interphase (CEI) forms at the electrode-electrolyte interface, which can modify the effective voltage tolerance.

At the anode side, the in-situ formed gradient structure passivation layer between LZC-10TF and Li metal (**Supplementary Fig. 33**) can stabilize the Li/HSE interface and enable the application of Li metal anode in our battery, despite a voltage lower limit of 1.53 V reflected by LSV. There are previous theoretical studies showing the same results about the role of passivation layers in enabling the interface stability.

At the cathode side, the trace LiF interphase detected on the cycled NCM811 cathode via XPS likely plays a critical role in stabilizing the cathode-electrolyte interface (**Supplementary Fig. 40**). This self-formed LiF-rich CEI may suppress undesirable side reactions (e.g., electrolyte decomposition or cathode cation dissolution) at the elevated voltage, enabling the NCM811/LZC-10TF/Li cell to operate beyond the electrolyte's electrochemical window.


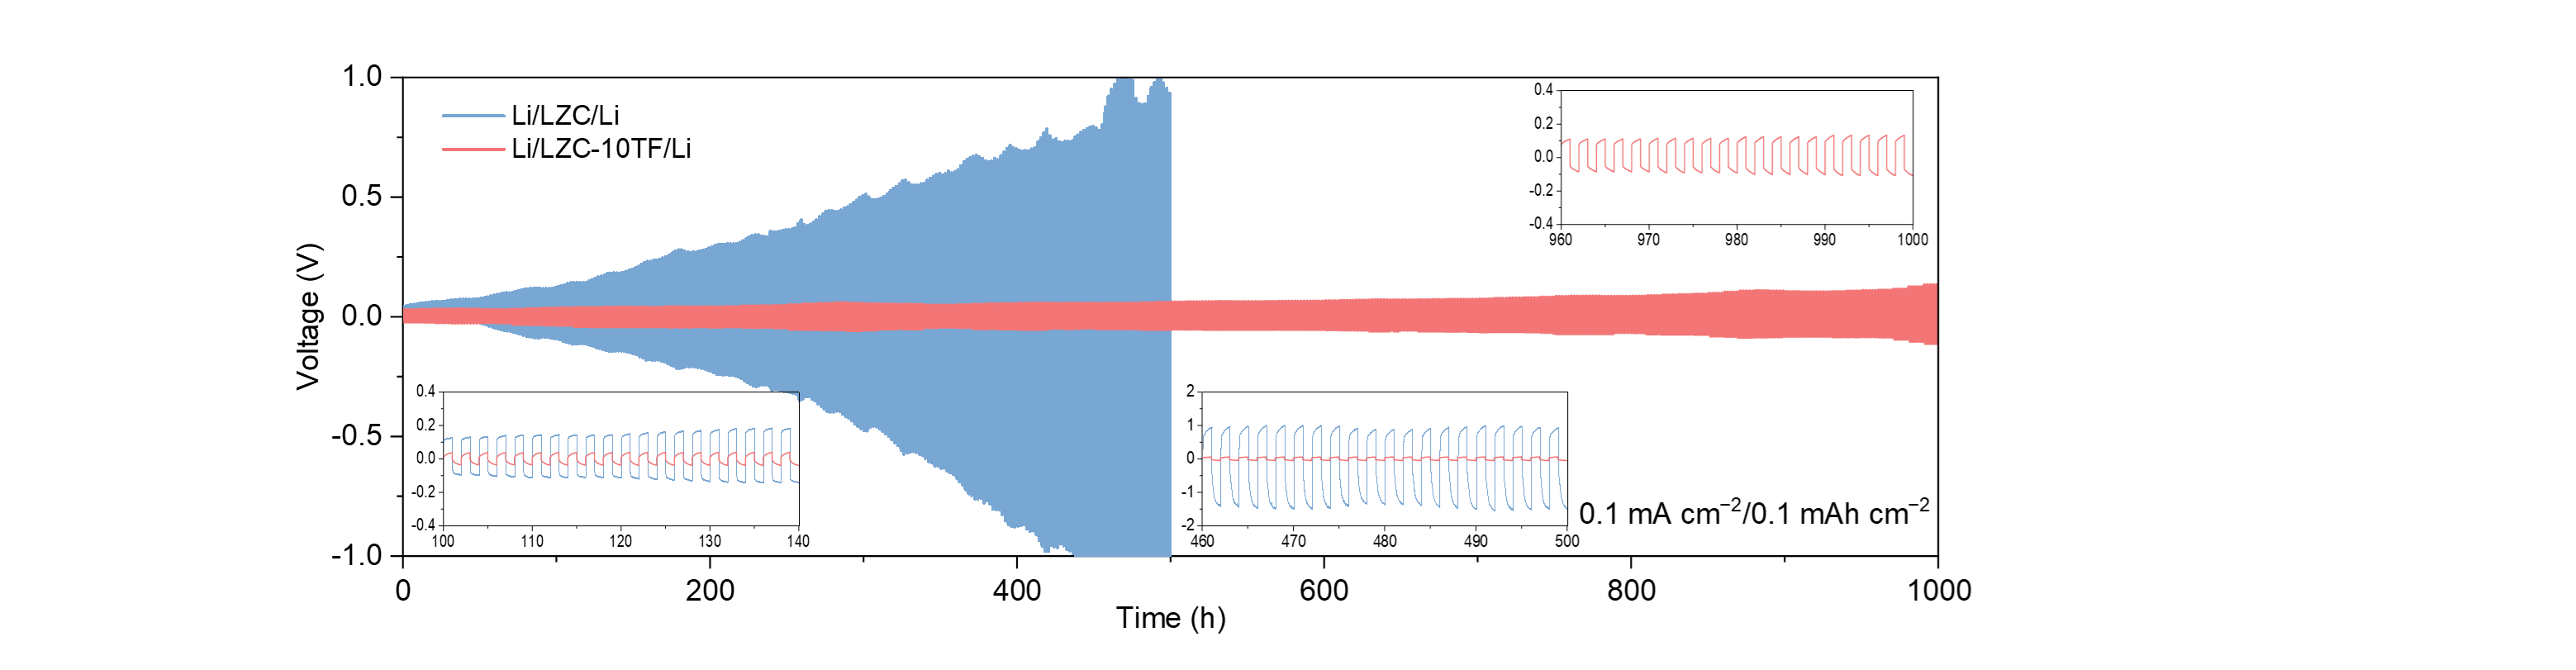


**Supplementary Fig. 29 |** Galvanostatic cycling of Li/LZC/Li and Li/LZC-10TF/Li symmetric cells at the current density of 0.1 mA cm⁻2 for 0.1 mAh cm⁻2. The insets show enlarged voltage profiles of symmetric cells at 100-140 h, 460-500 h, and 960-1000 h.


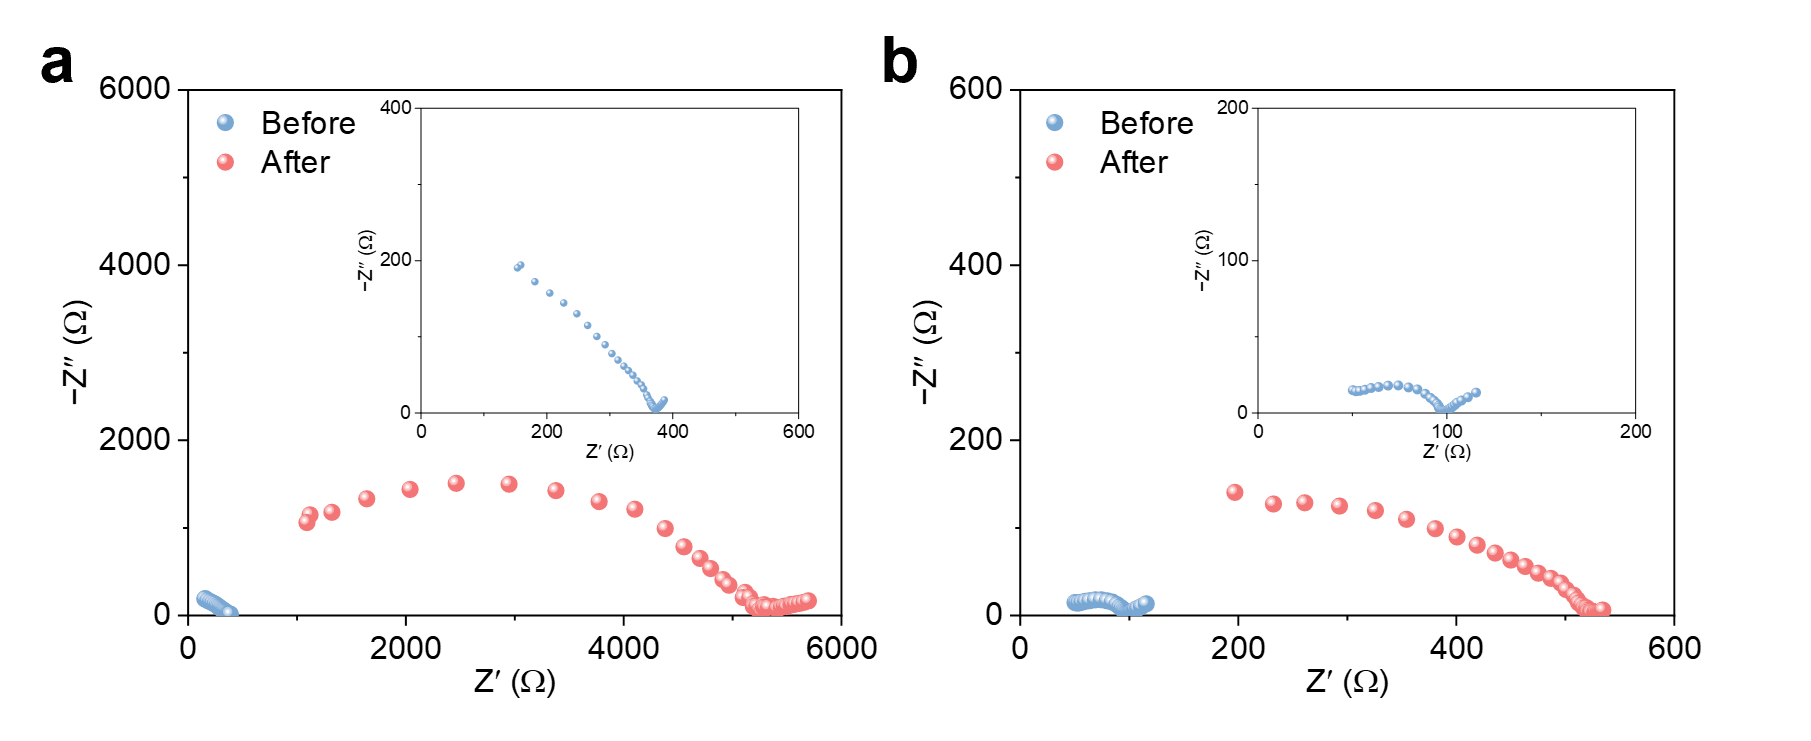


**Supplementary Fig. 30 | a,b** Nyquist plots of the Li/LZC/Li (**a**) and Li/LZC-10TF/Li (**b**) symmetric cells before and after 500 h cycling at 0.1 mA cm⁻2 for 0.1 mAh cm⁻2.


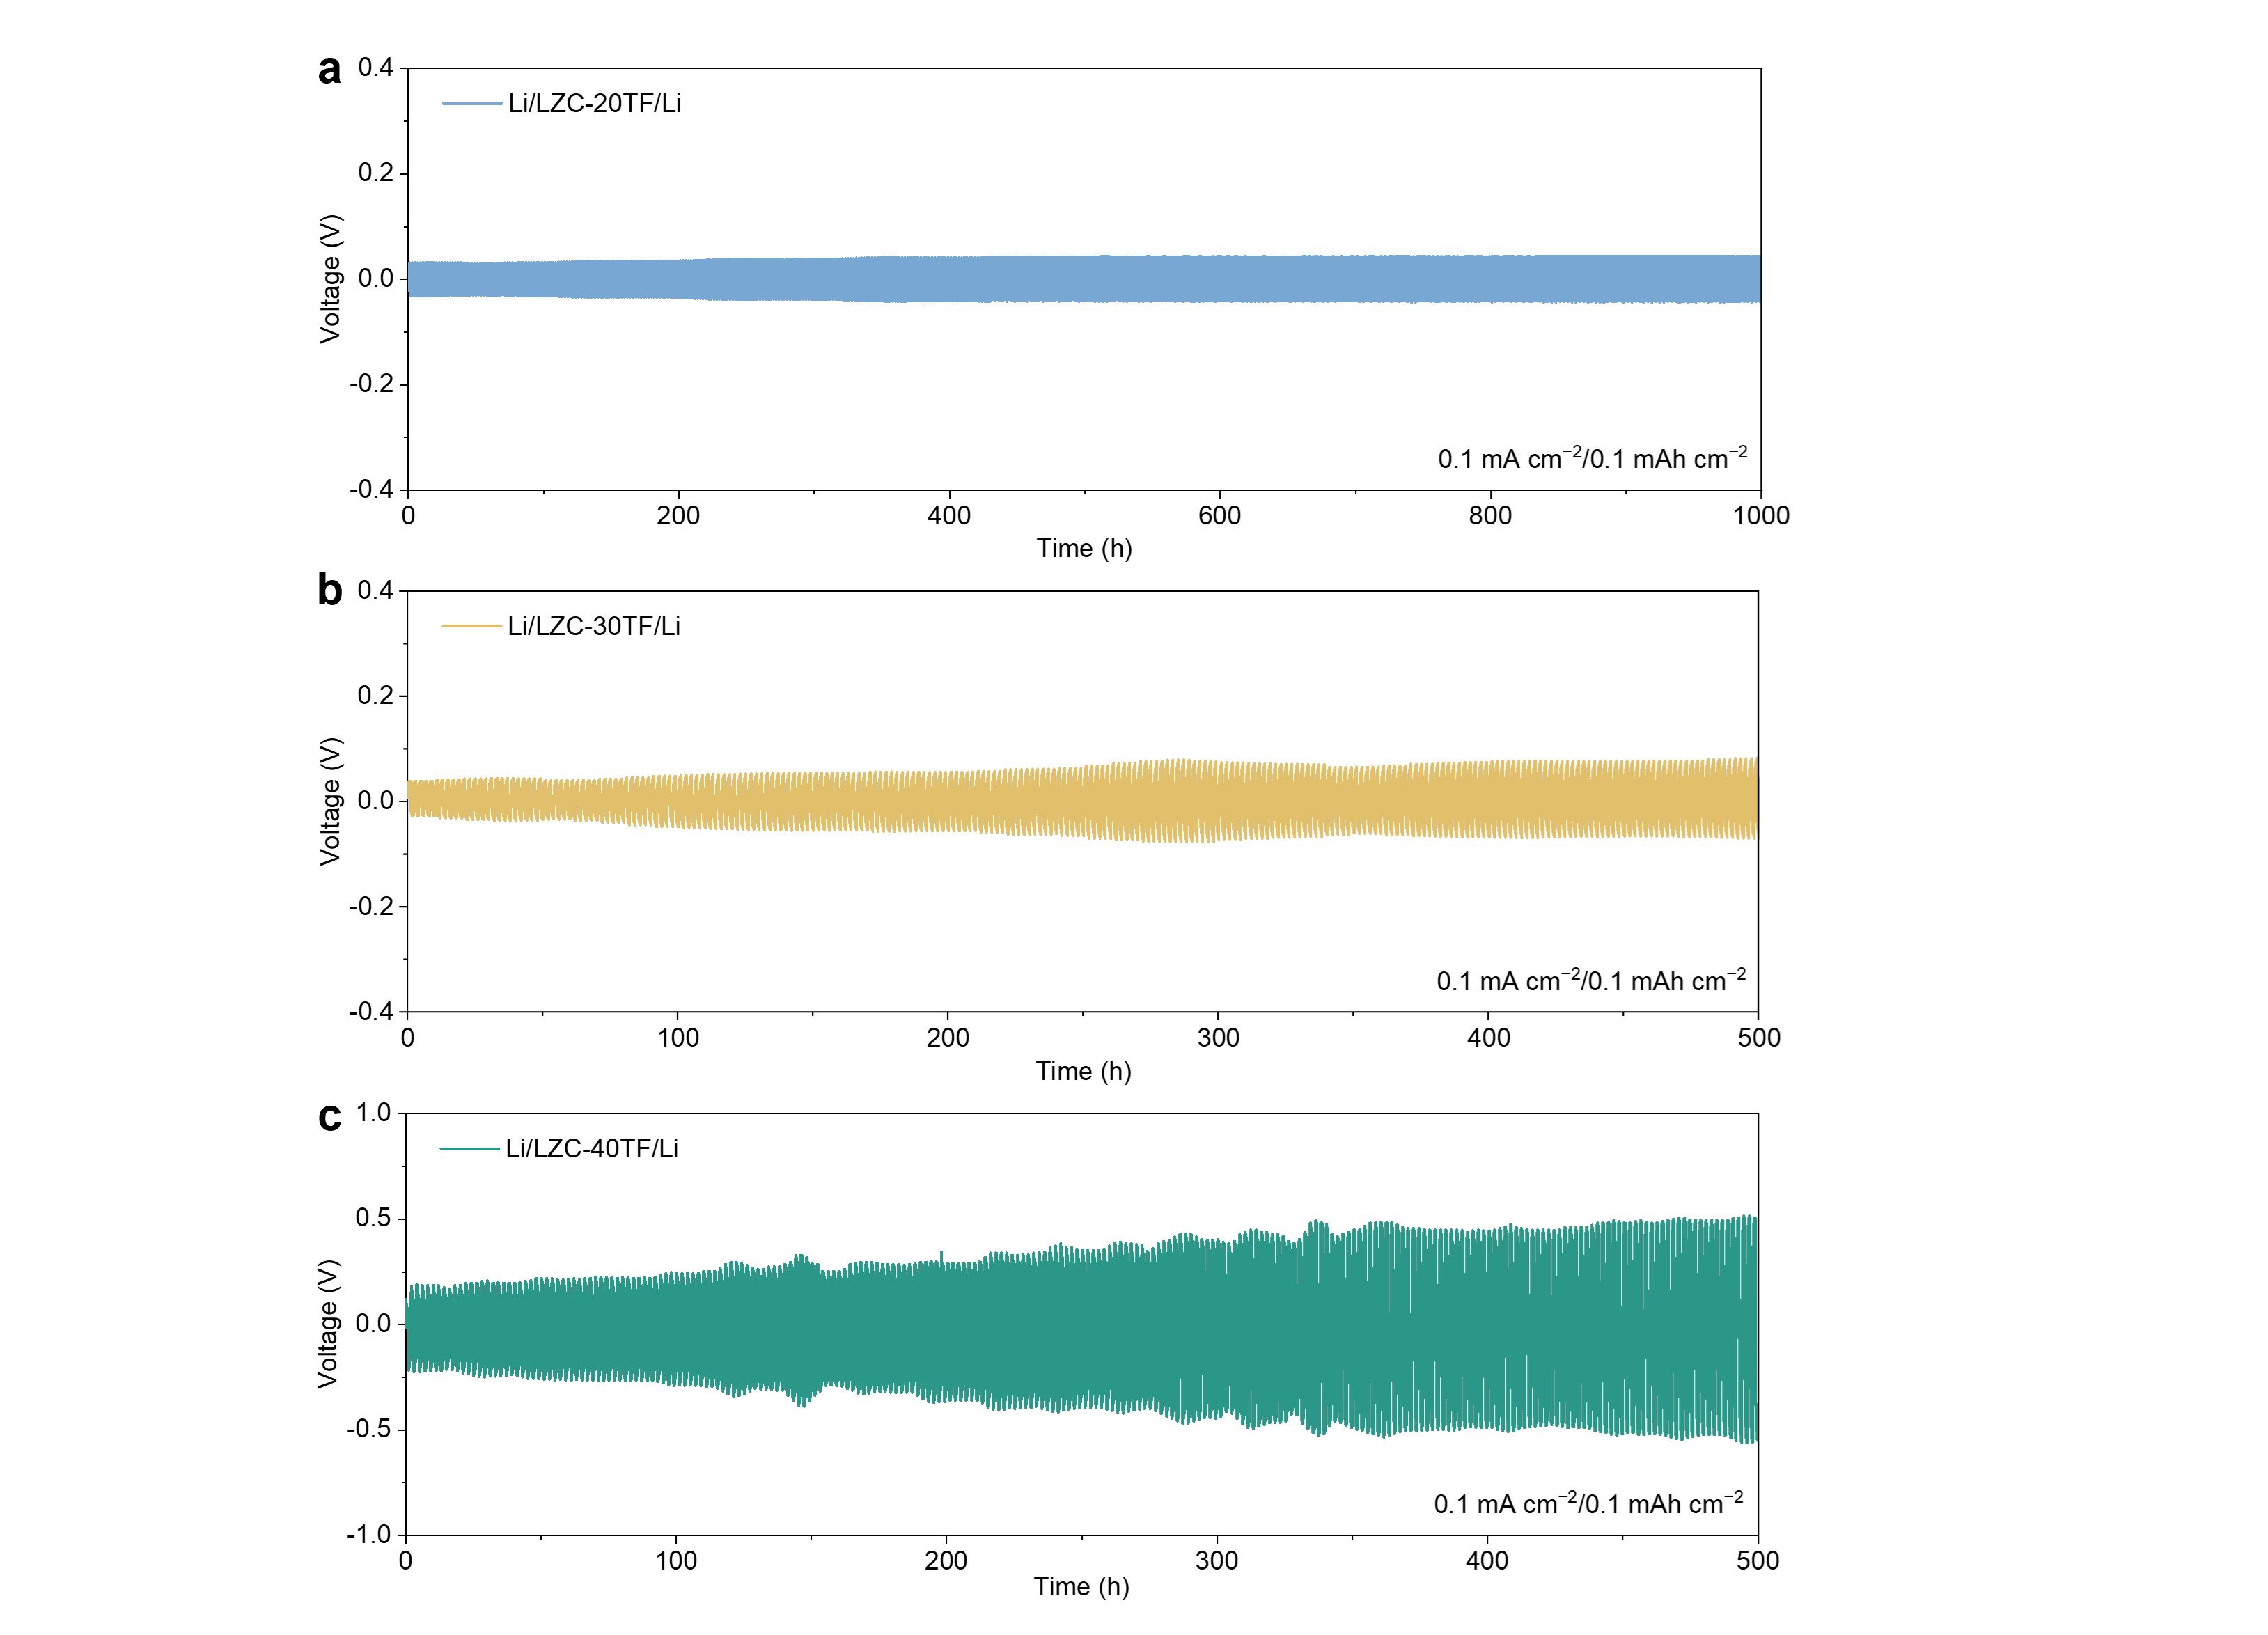


**Supplementary Fig. 31 | a-c** Galvanostatic cycling of Li/LZC-20TF/Li (**a**), Li/LZC-30TF/Li (**b**), and Li/LZC-40TF/Li (**c**) symmetric cells at the current density of 0.1 mA cm⁻2 for 0.1 mAh cm⁻2.


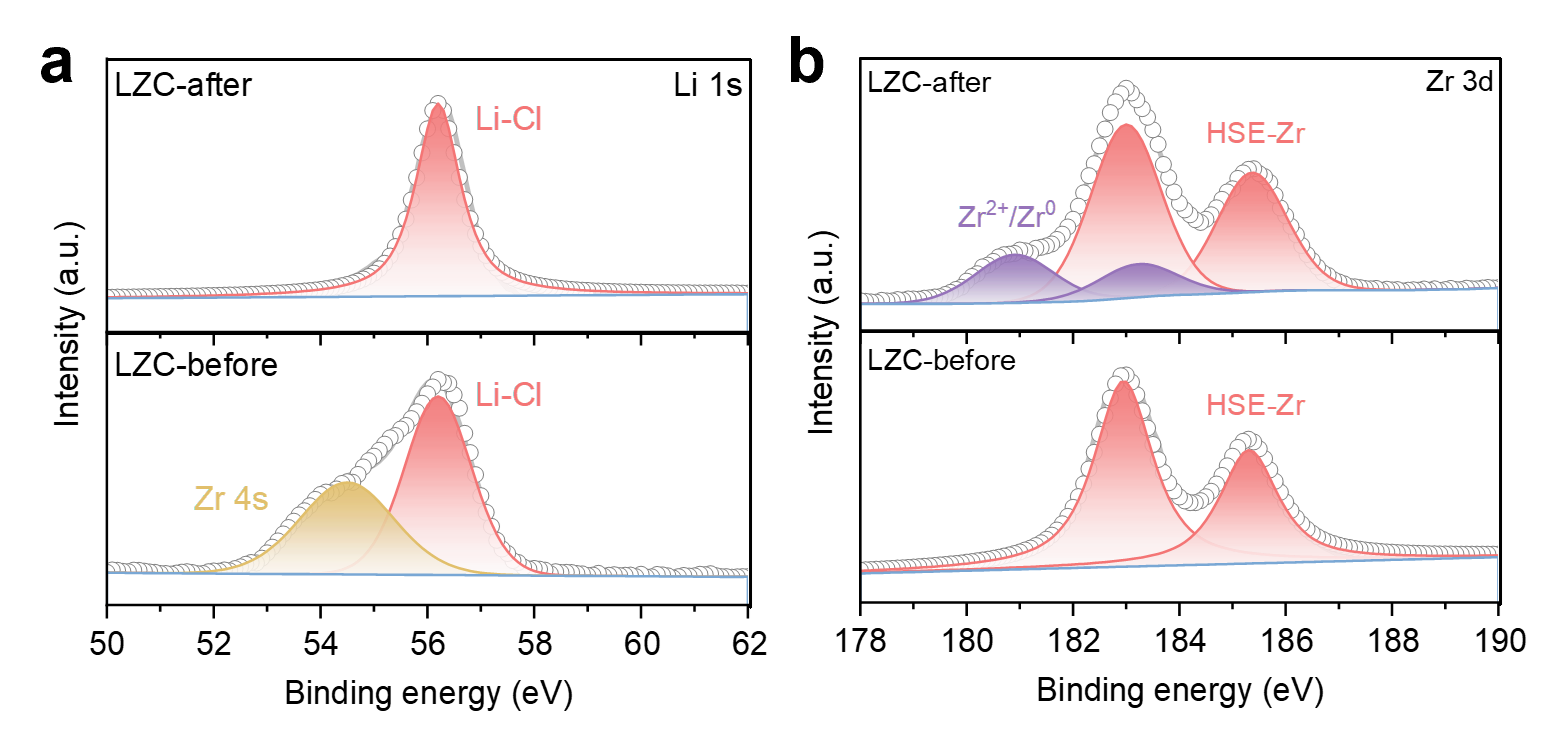


**Supplementary Fig. 32 | a,b** Li 1s (**a**) and Zr 3d (**b**)XPS spectra of the pristine LZC HSE before and after 500 h cycling at 0.1 mA cm−2 for 0.1 mAh cm−2.


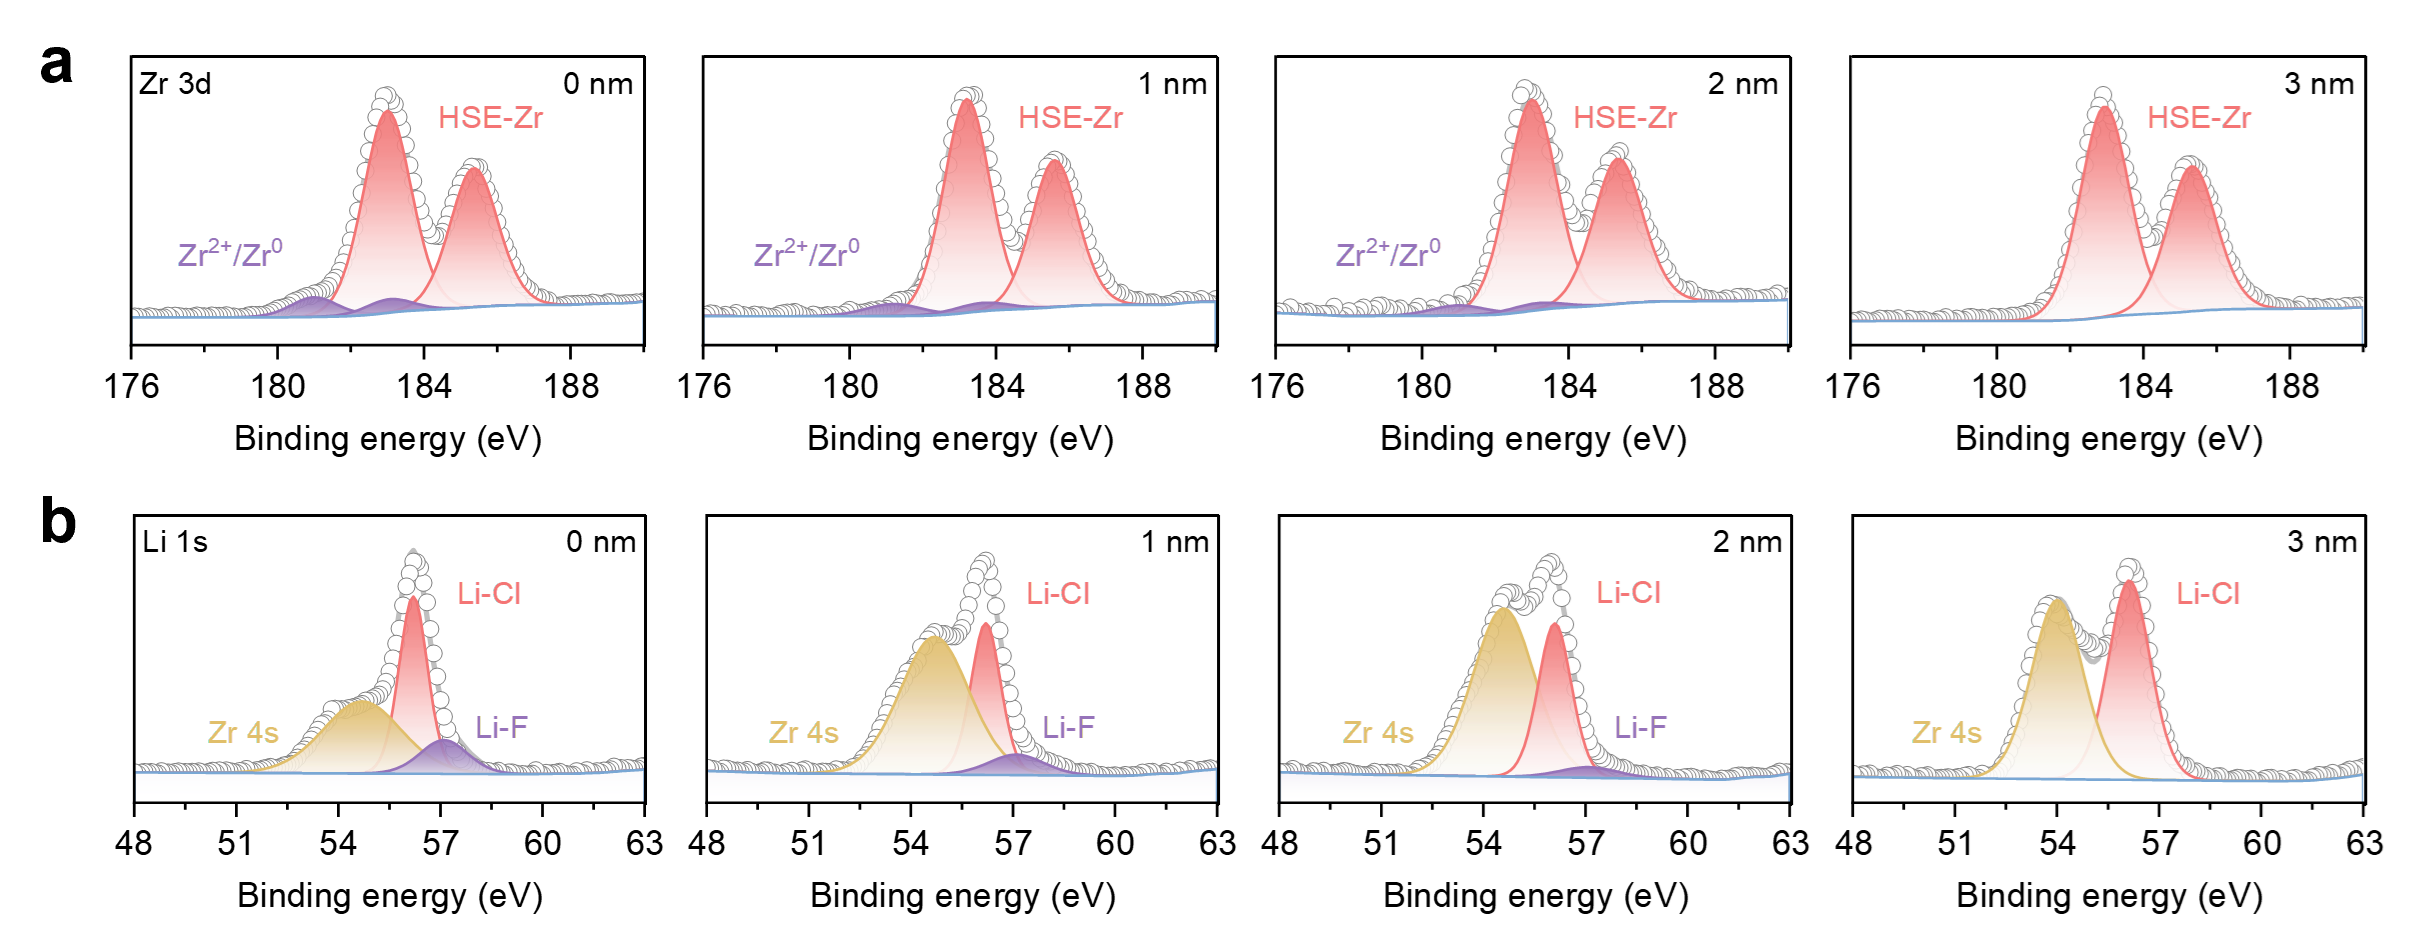


**Supplementary Fig. 33 | a,b** Zr 3d (**a**) and Li 1s (**b**) in-depth XPS spectra of the LZC-10TF HSE after 500 h cycling at 0.1 mA cm⁻2 for 0.1 mAh cm⁻2.

**Discussion:** XPS depth profiling of Zr 3d (**Supplementary Fig. 33a**) reveals dominant Zr4+ contributions (red areas) with primary peaks near 183.0 eV across depths (0-3 nm). Minor Zr2+/Zr0 species (181.0 eV) show a gradient distribution with decreasing ratios of 8.5%, 6.4%, 5.2%, and 0% at 0, 1, 2, and 3 nm, respectively. This Zr2+/Zr0 gradient resembles Ti0 behavior and arises from Zr’s lower electronegativity (1.33 vs. Ti’s 1.54), enhancing its resistance to reduction. In Li 1s spectra (**Supplementary Fig. 33b**), LiF signals observed at 0-2 nm depths correlate with F 1s profiles in **Fig. 5e**. The LiF interphase suppressed continuous interfacial degradation, preserving the (electro)chemical integrity of the LZC-10TF electrolyte at 3 nm.


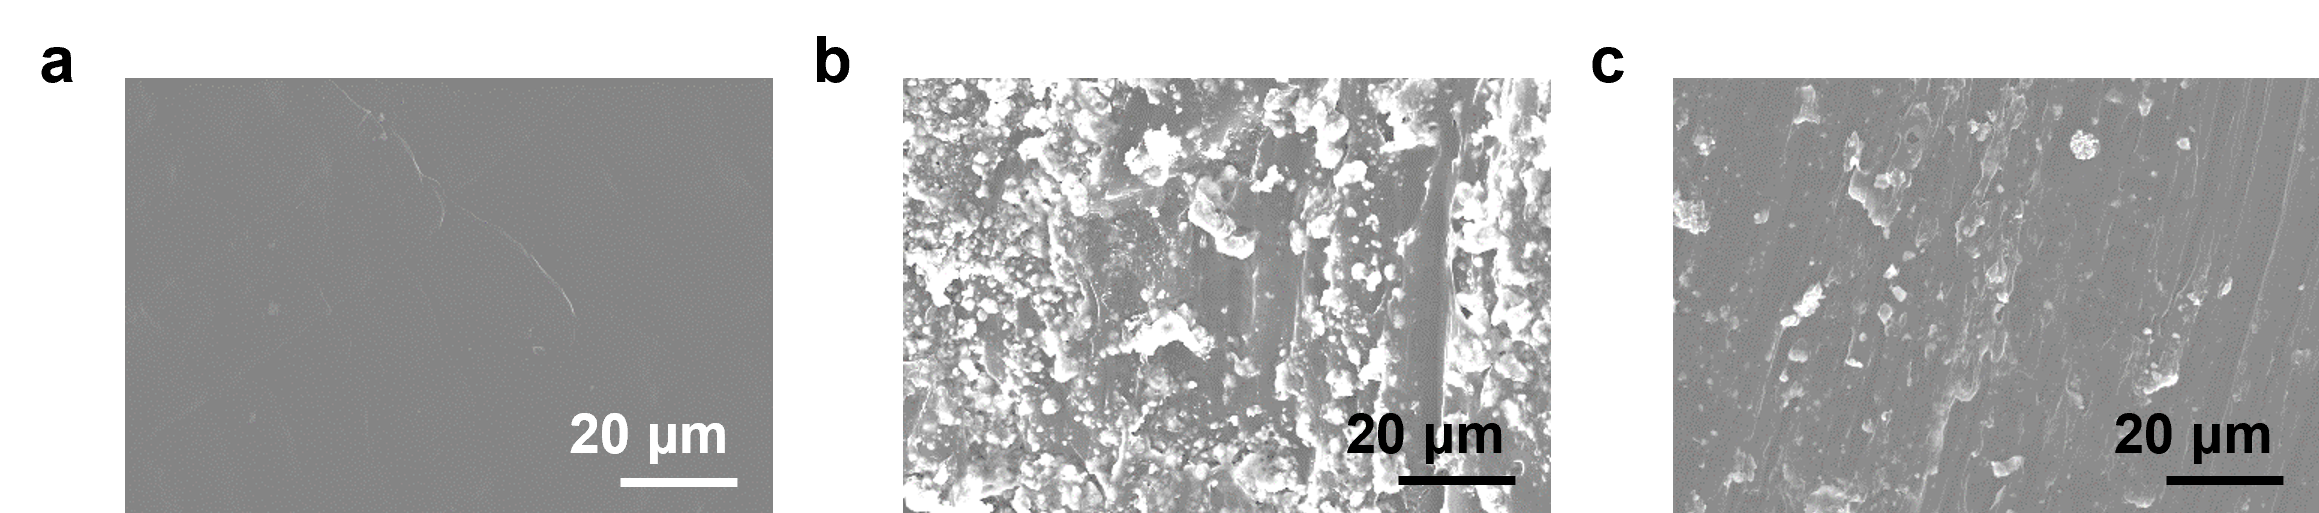


**Supplementary Fig. 34 | a** SEM image of the pristine Li metal surface. **b, c** SEM images of Li metal surface after 500 h cycling at 0.1 mA cm−2 for 0.1 mAh cm−2 in the Li/LZC/Li (**b**) and Li/LZC-10TF/Li (**c**) symmetric cells.


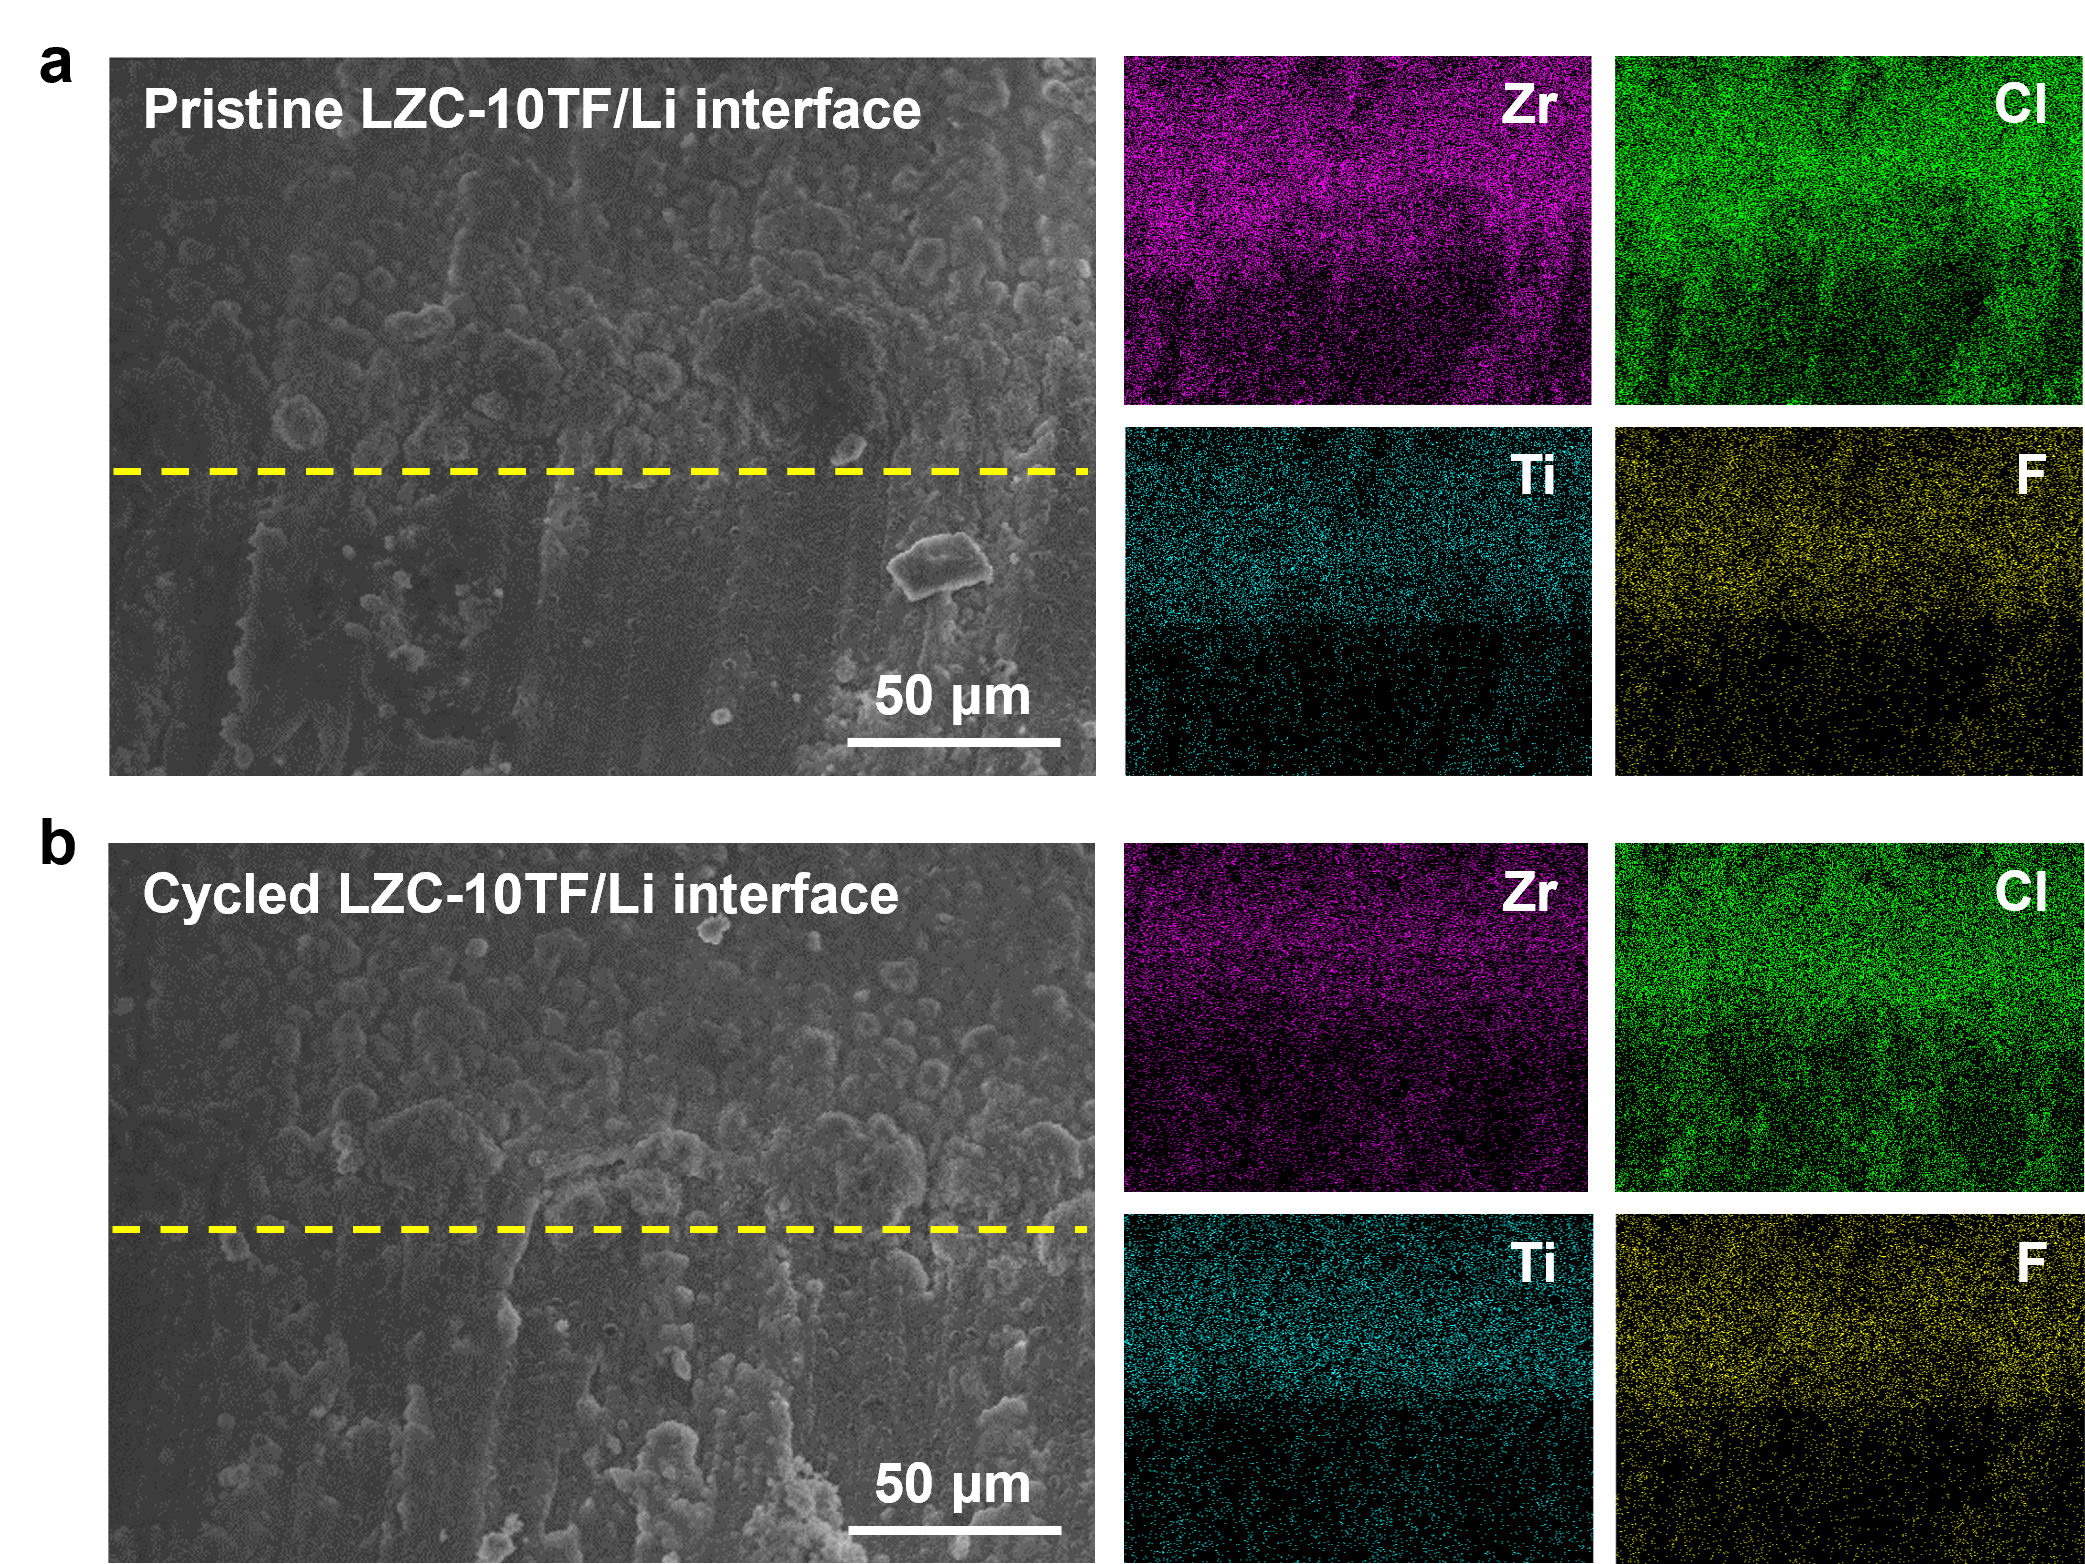


**Supplementary Fig. 35 | a,b** Typical cross-sectional SEM images and elemental analysis of the pristine (**a**) and cycled (**b**) LZC-10TF/Li interfaces in Li/LZC-10TF/Li symmetric cells.


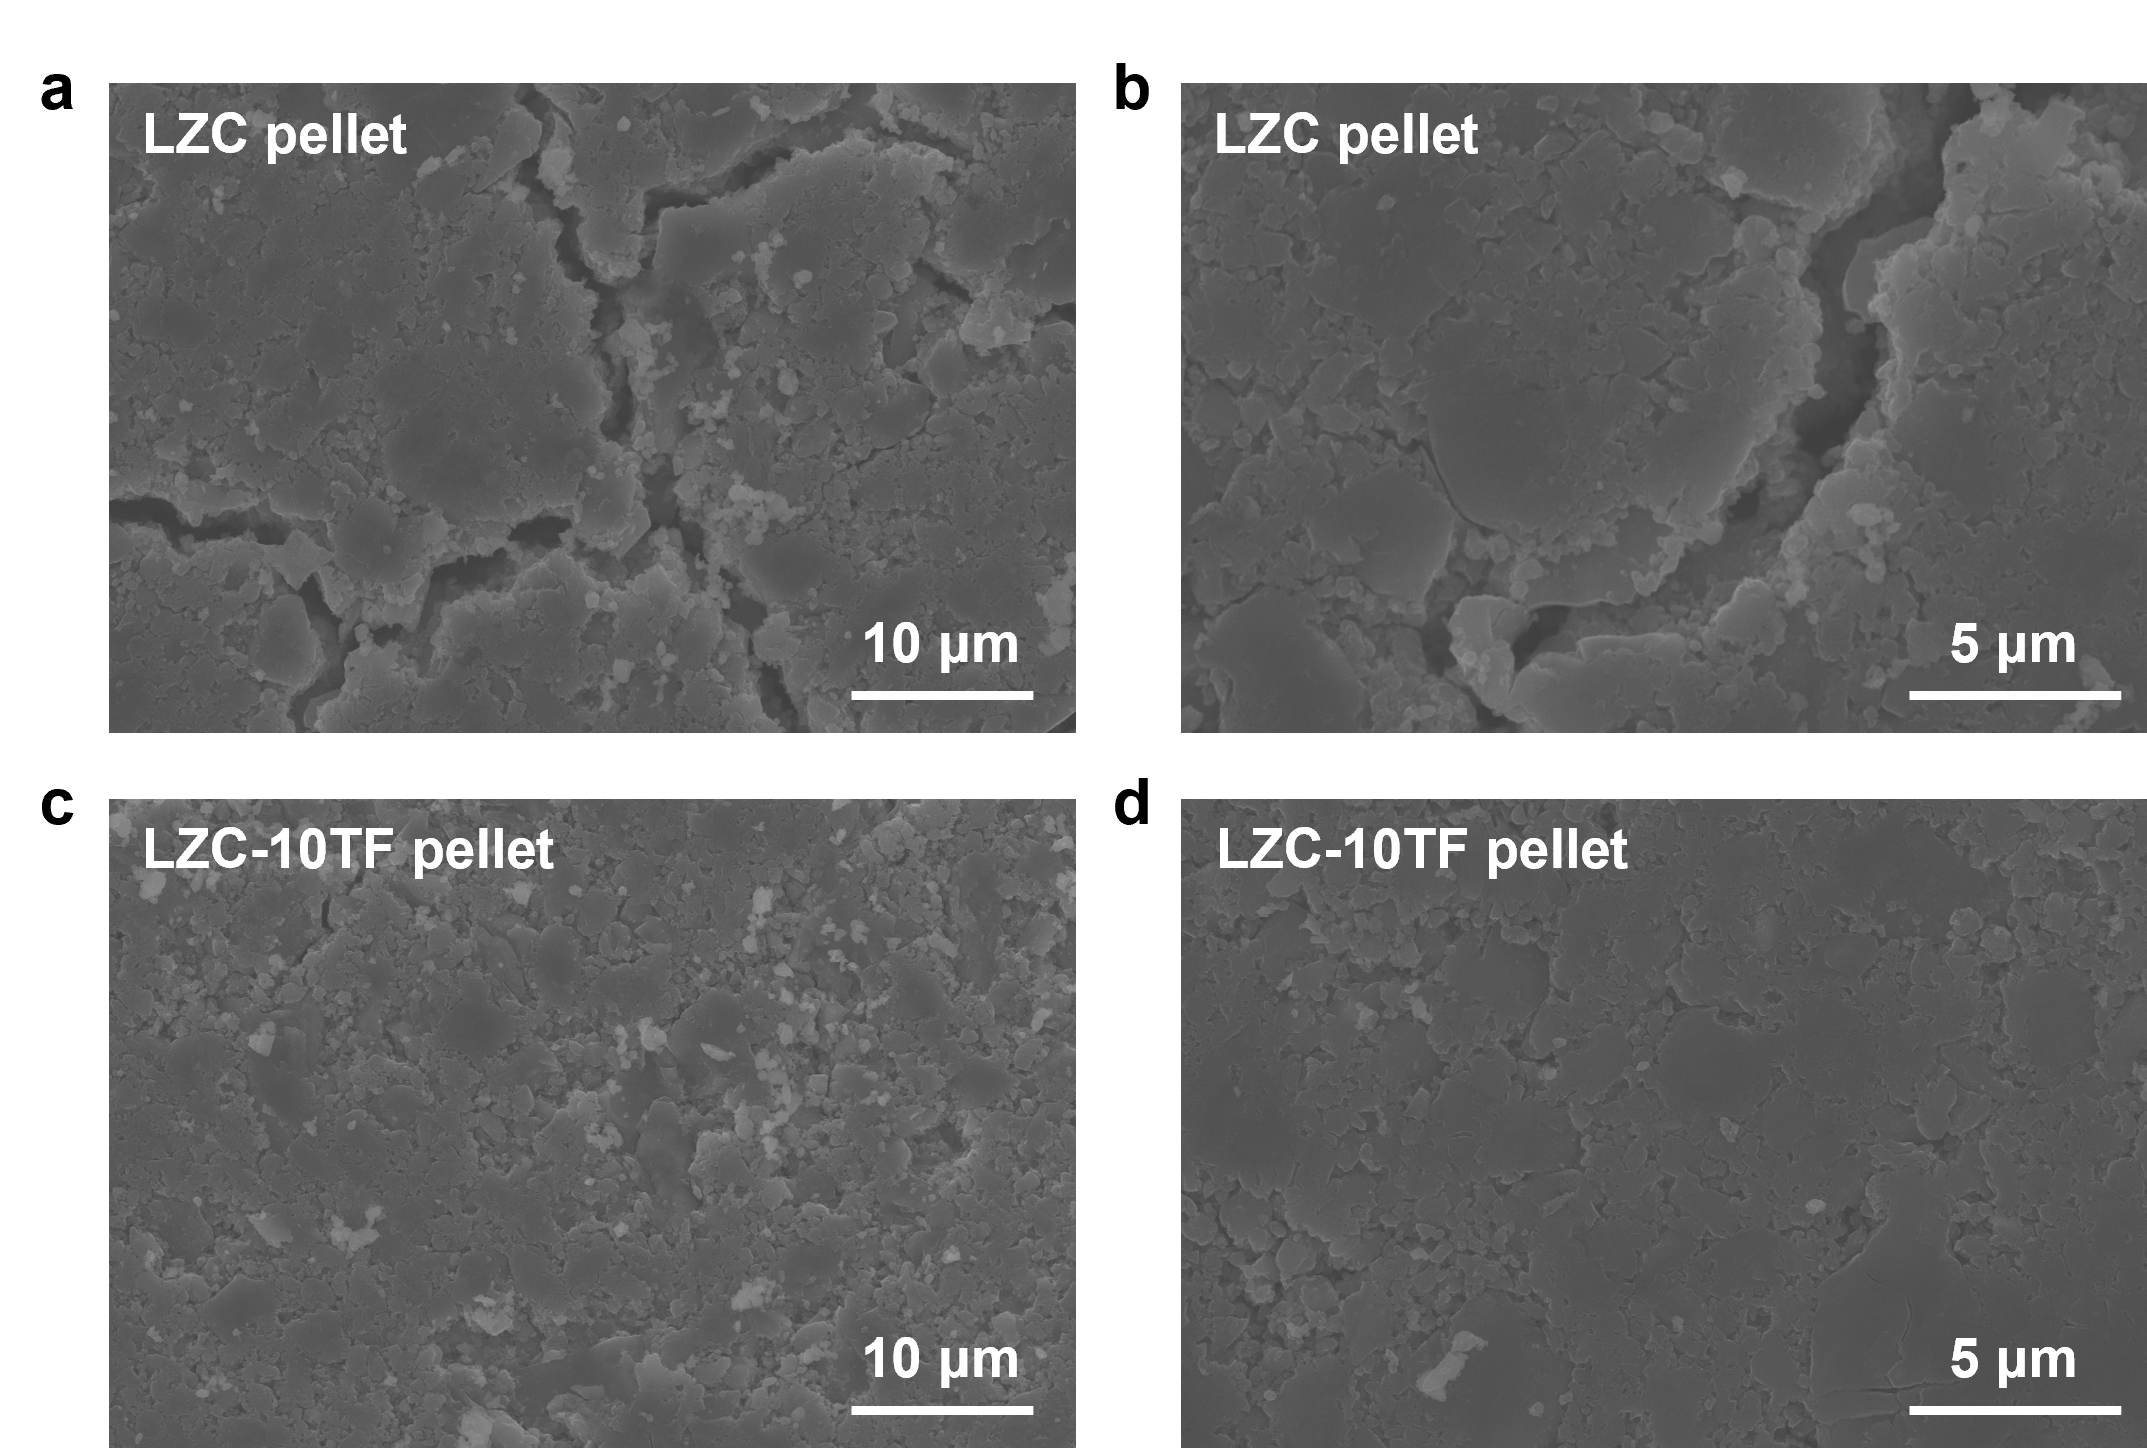


**Supplementary Fig. 36 |** **Compressibility of electrolytes. a**,**b** Low (**a**) and high (**b**) magnification SEM images of LZC electrolyte pellets cold-pressed at 300 MPa pressure. **c**,**d** Low (**c**) and high (**d**) magnification SEM images of LZC-10TF electrolyte pellets cold-pressed at 300 MPa pressure.


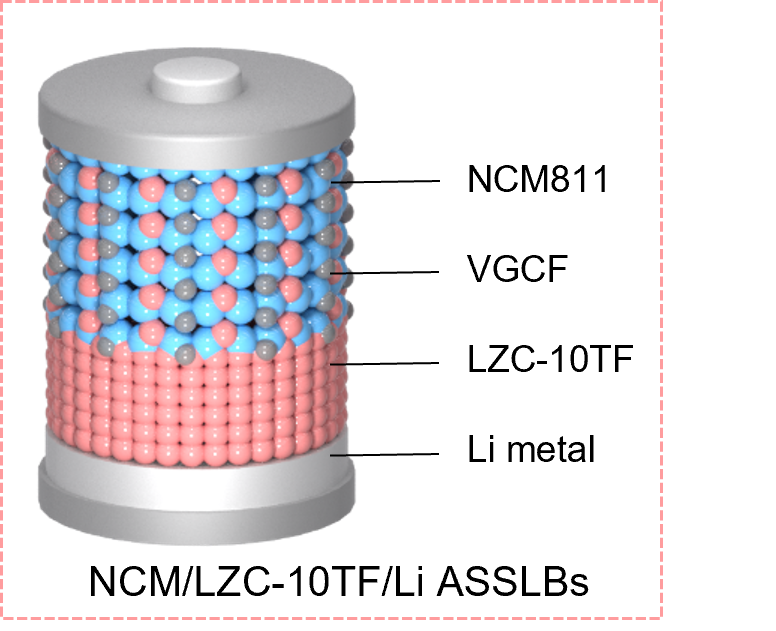


**Supplementary Fig. 37 |** Schematic diagram of NCM811/LZC-10TF/Li ASSLMBs.


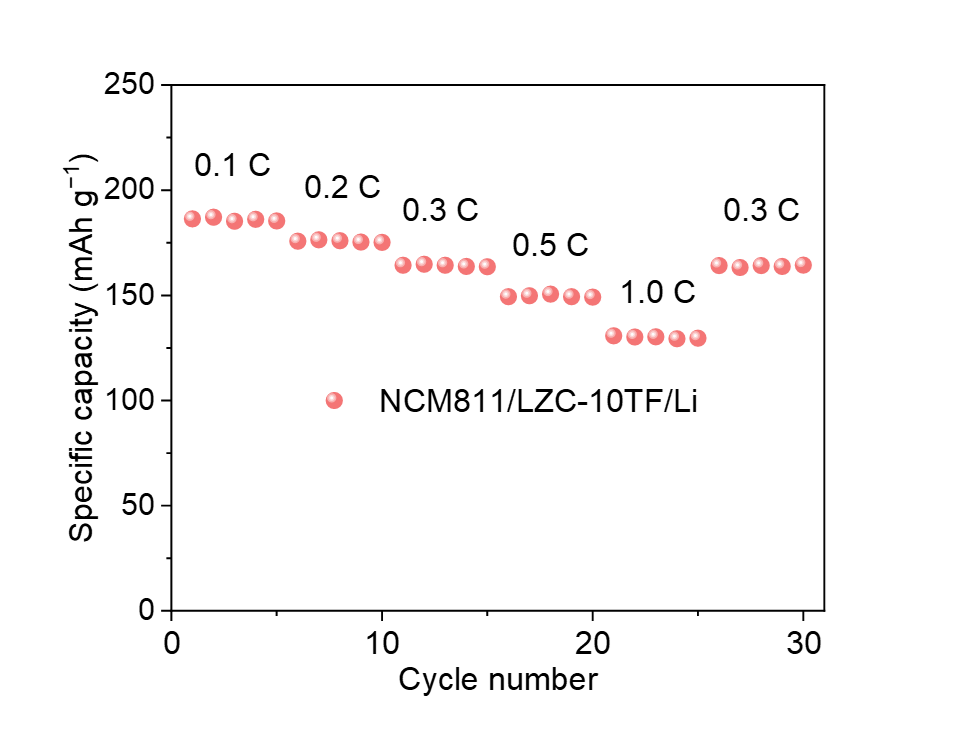


**Supplementary Fig. 38 |** Rate performance of the NCM811/LZC-10TF/Li cell (NCM811 loading: 8.9 mg cm⁻2, 25 ℃).


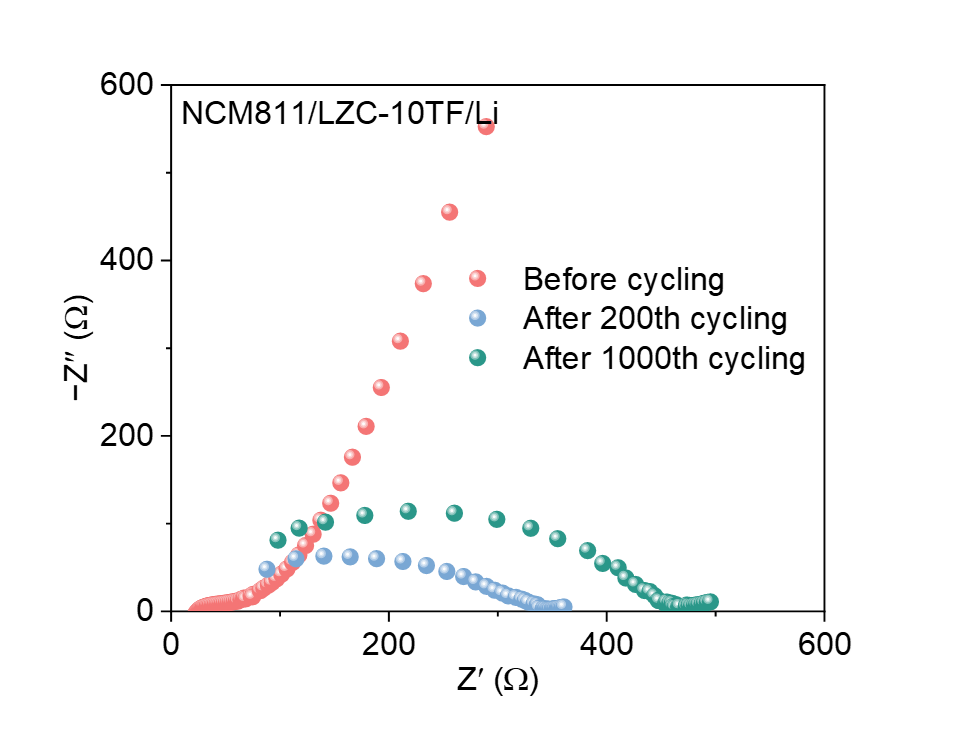


**Supplementary Fig. 39 |** Impedance plots of the NCM811/LZC-10TF/Li cell recorded at different cycles (NCM811 loading: 8.9 mg cm−2, 1.0 C, 25 ℃).


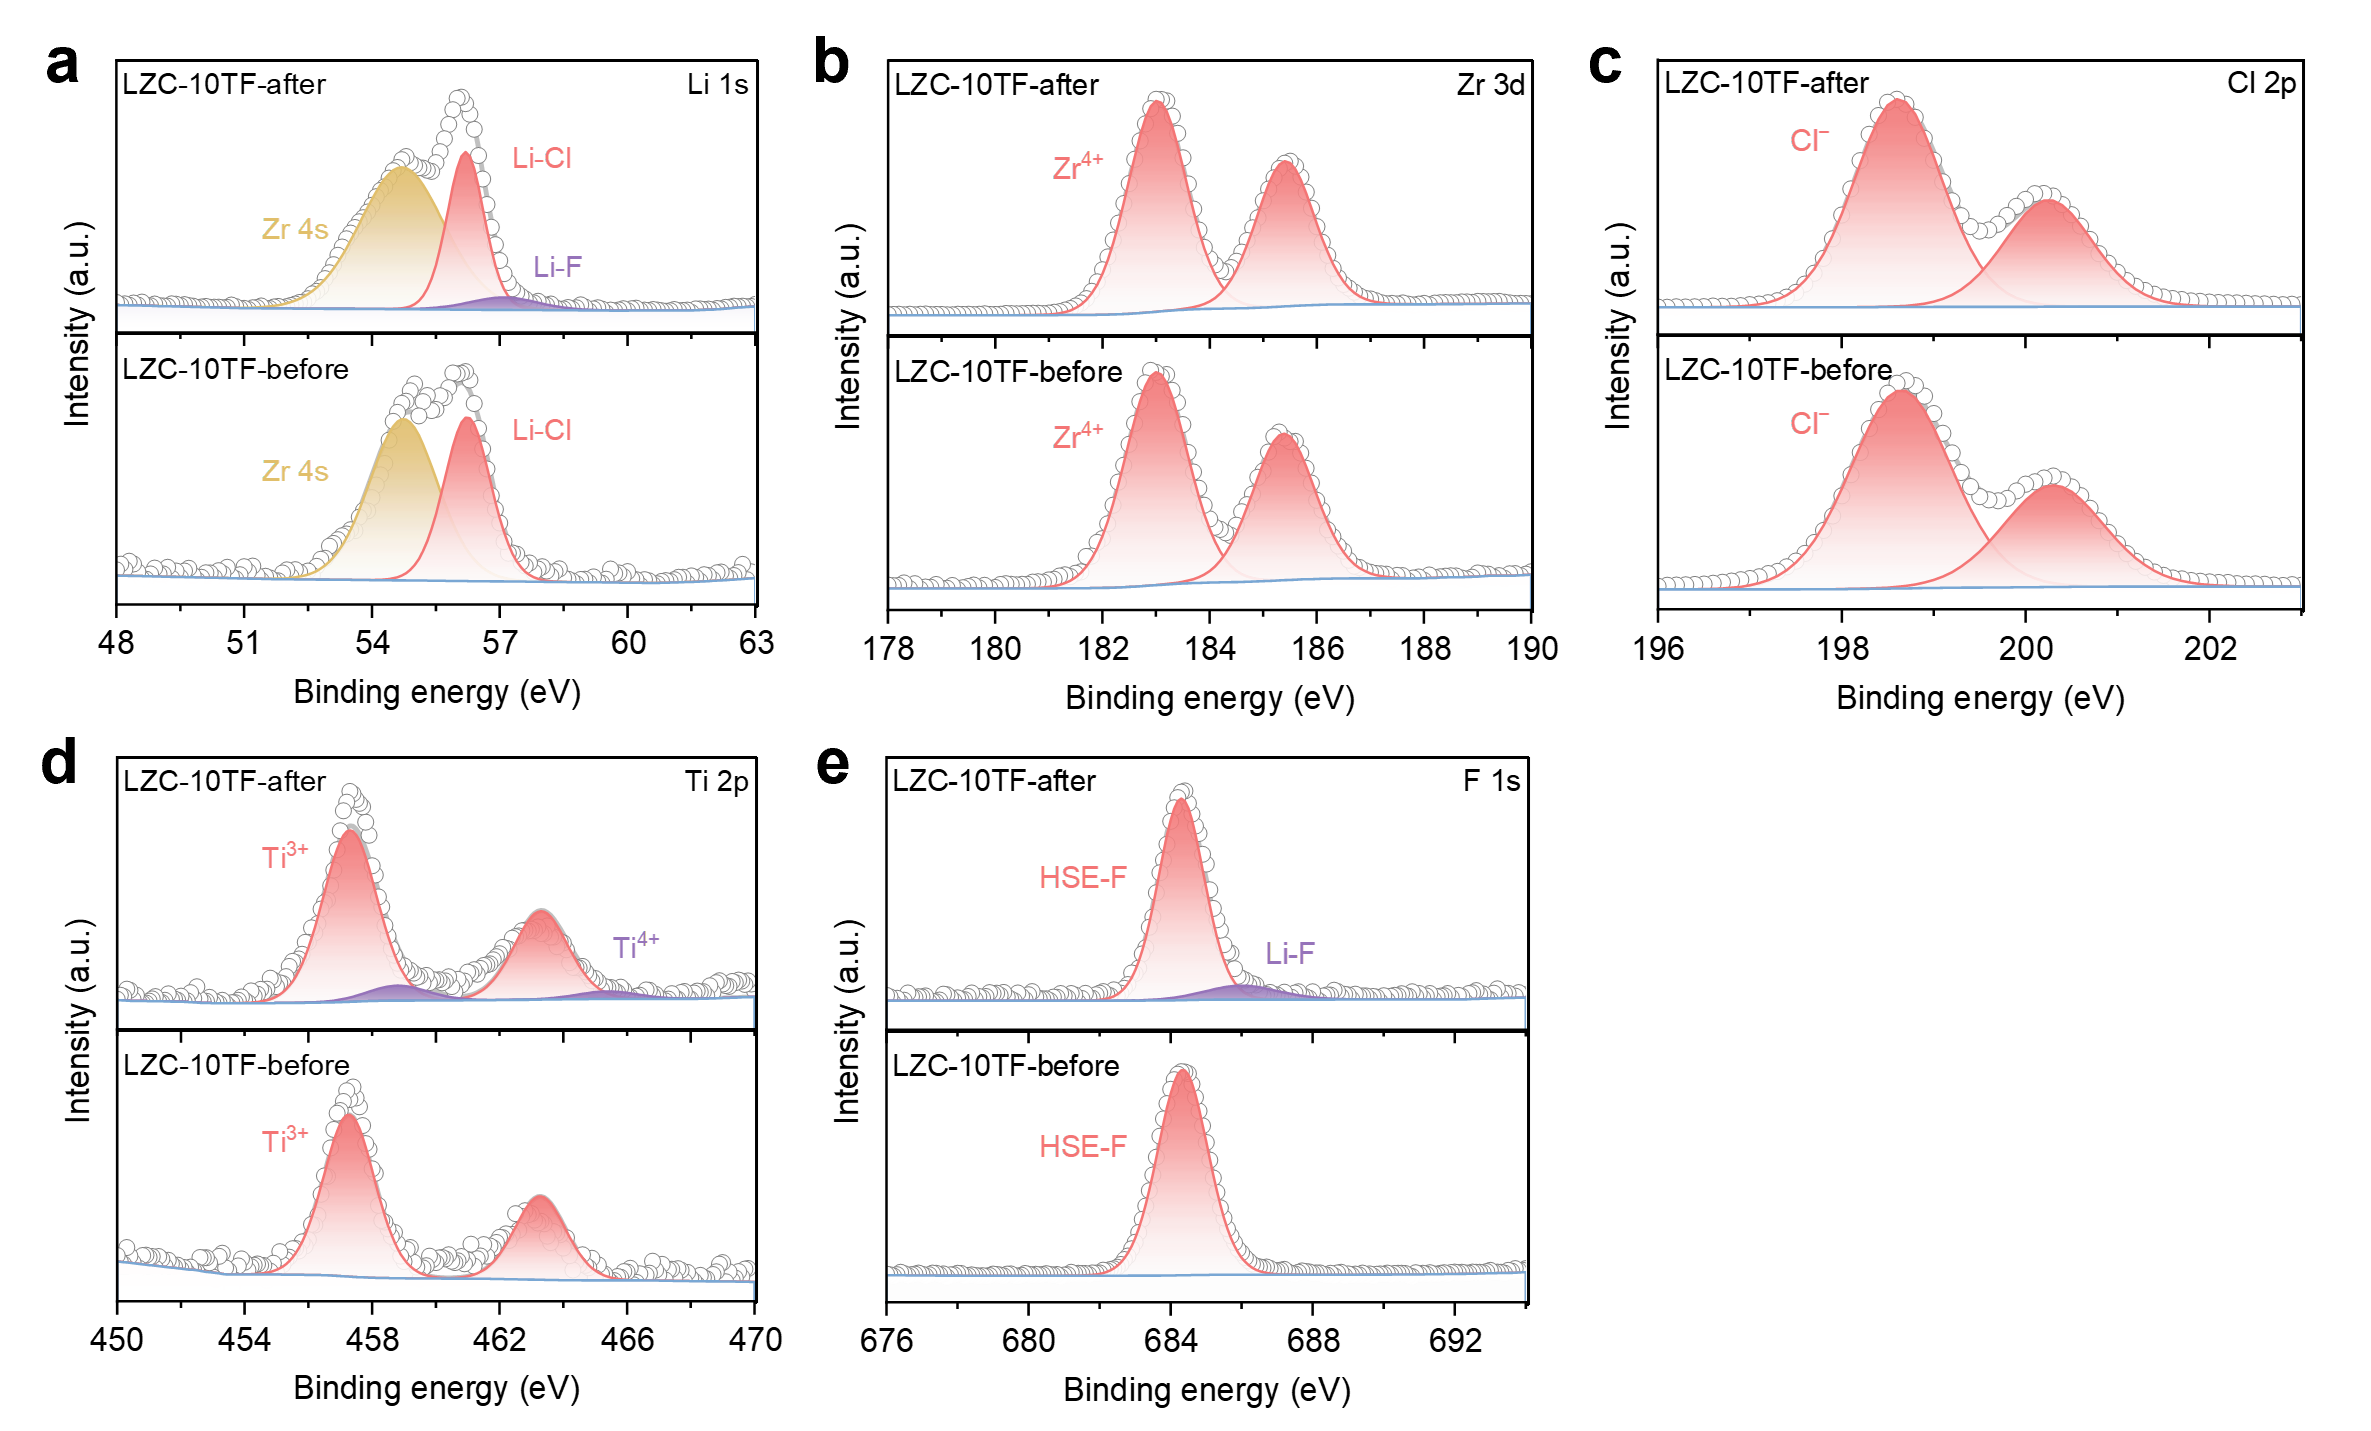


**Supplementary Fig. 40 | a-e** Li 1s (**a**), Zr 3d (**b**), Cl 2p (**c**), Ti 2p (**d**), and F 1s (**e**) XPS spectra of the NCM811/LZC-10TF composite cathode before and after cycling at 1.0 C for 1000 cycles.

**Discussion:** To probe the (electro)chemical stability of LZC-10TF electrolyte within NCM811 composite cathode before and after cycling, XPS analysis was used. Post-cycling Li 1s and F 1s spectra (**Supplementary Fig. 40a,e**) reveal trace LiF interphase formation, indicating suppression of interfacial degradation. Zr 3d and Cl 2p spectra (**Supplementary Fig. 40b,c**) show stable peak positions post-cycling, while Ti 2p spectra (**Supplementary Fig. 40d**) exhibit weak Ti4+ signals, suggesting limited irreversible oxidation of Ti3+. These results collectively confirm inhibited interfacial reactions at the NCM811/LZC-10TF interface, demonstrating the efficacy of TiF3 doping in stabilizing the cathode-electrolyte interface.


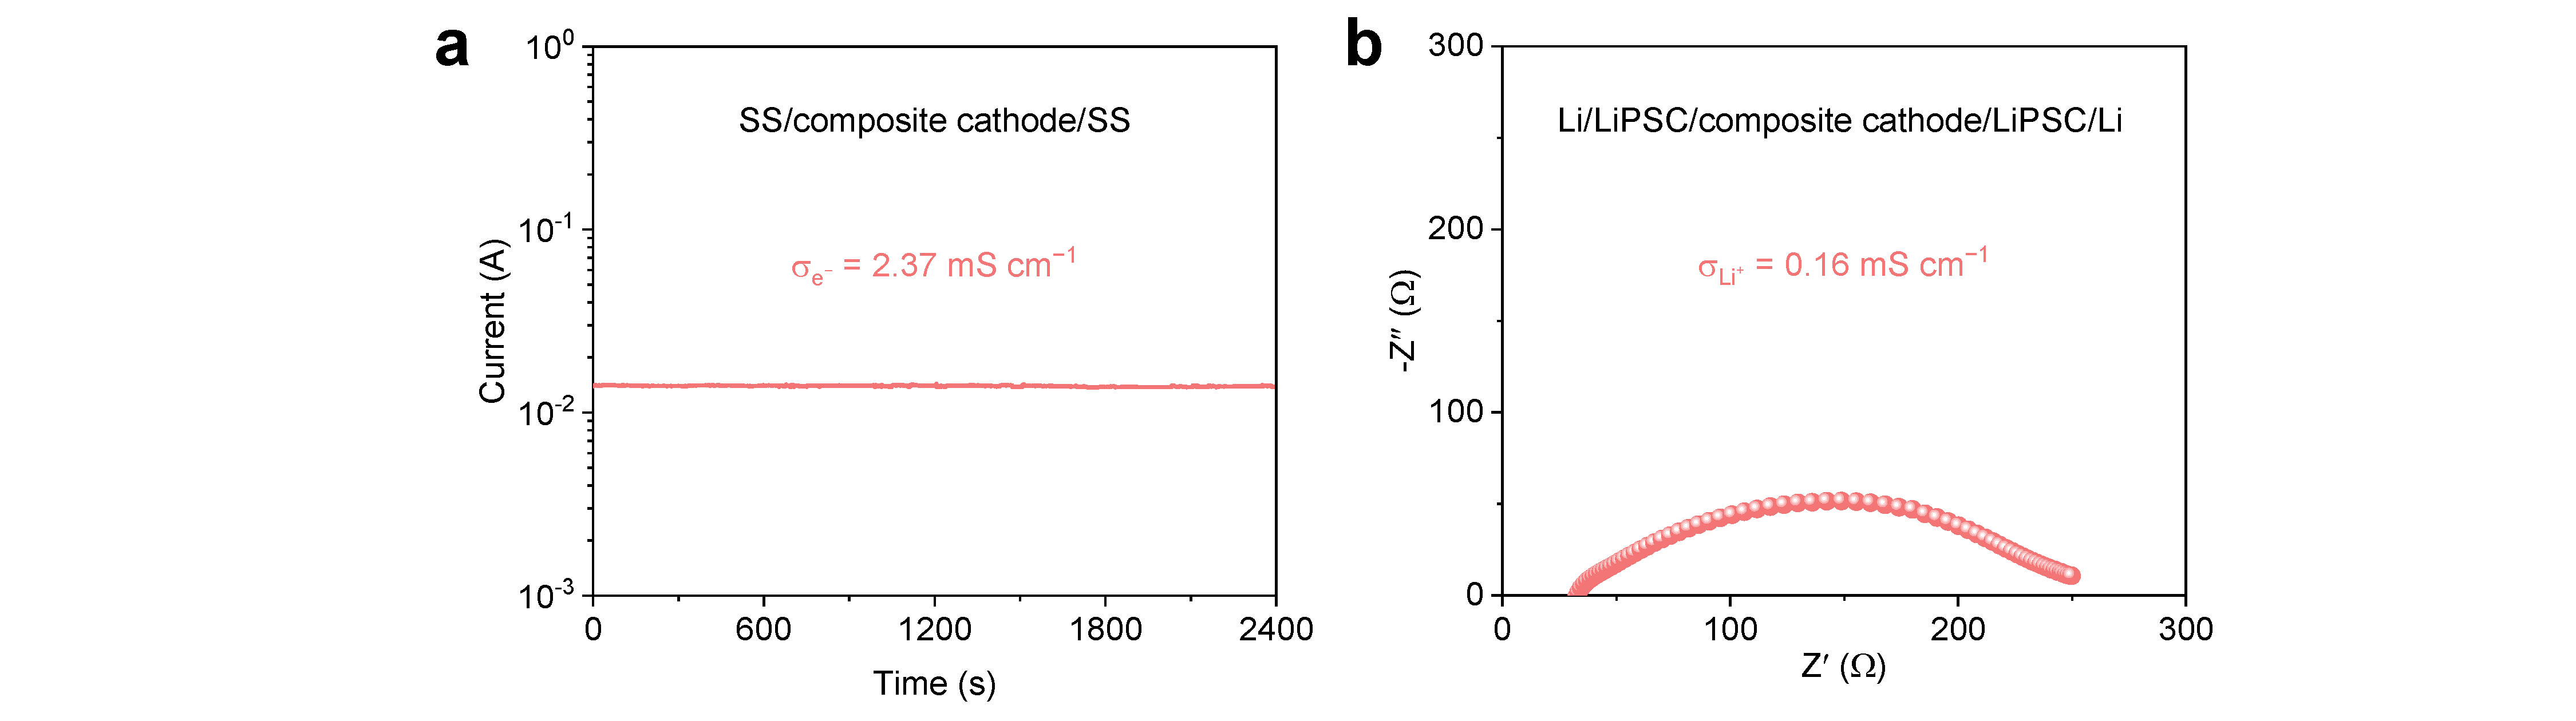


**Supplementary Fig. 41 | Conductivity of NCM811 composite cathode.** **a** A current vs. time curve of the NCM811 composite cathode by DC polarization method with ionic blocking cells SS/NCM811 cathode/SS (SS refers to stainless steel) with a constant voltage of 400 mV. **b** Nyquist plot of the NCM811 composite cathode. Electron-blocking Li/Li6PS5Cl/NCM811 cathode/Li6PS5Cl/Li cells were employed to measure Li+ conductivity of the cathode.

**Discussion:** Quantifying ion/electron conductivities ( and ) of composite cathodes is essential for evaluating ASSLMBs performance. The cathode comprised 70 wt% NCM811, 28 wt% LZC-10TF electrolyte, and 2 wt% VGCF. For estimation, SS rods served as ion-blocking electrodes and current collectors. Based on steady-state currents under a 0.4 V bias, the value of a 120 mg NCM811 composite cathode was calculated to be 2.37 mS cm−1 (**Supplementary Fig. 41a**). For measurement, Li6PS5Cl (LPSC) powder (60 mg), Li foil (10 mm), and SS rods acted as electron-blocking electrodes, Li+ sources, and current collectors, respectively. The Nyquist plot reveals a value of 0.16 mS cm−1 for the 60 mg NCM811 cathode (**Supplementary Fig. 41b**).


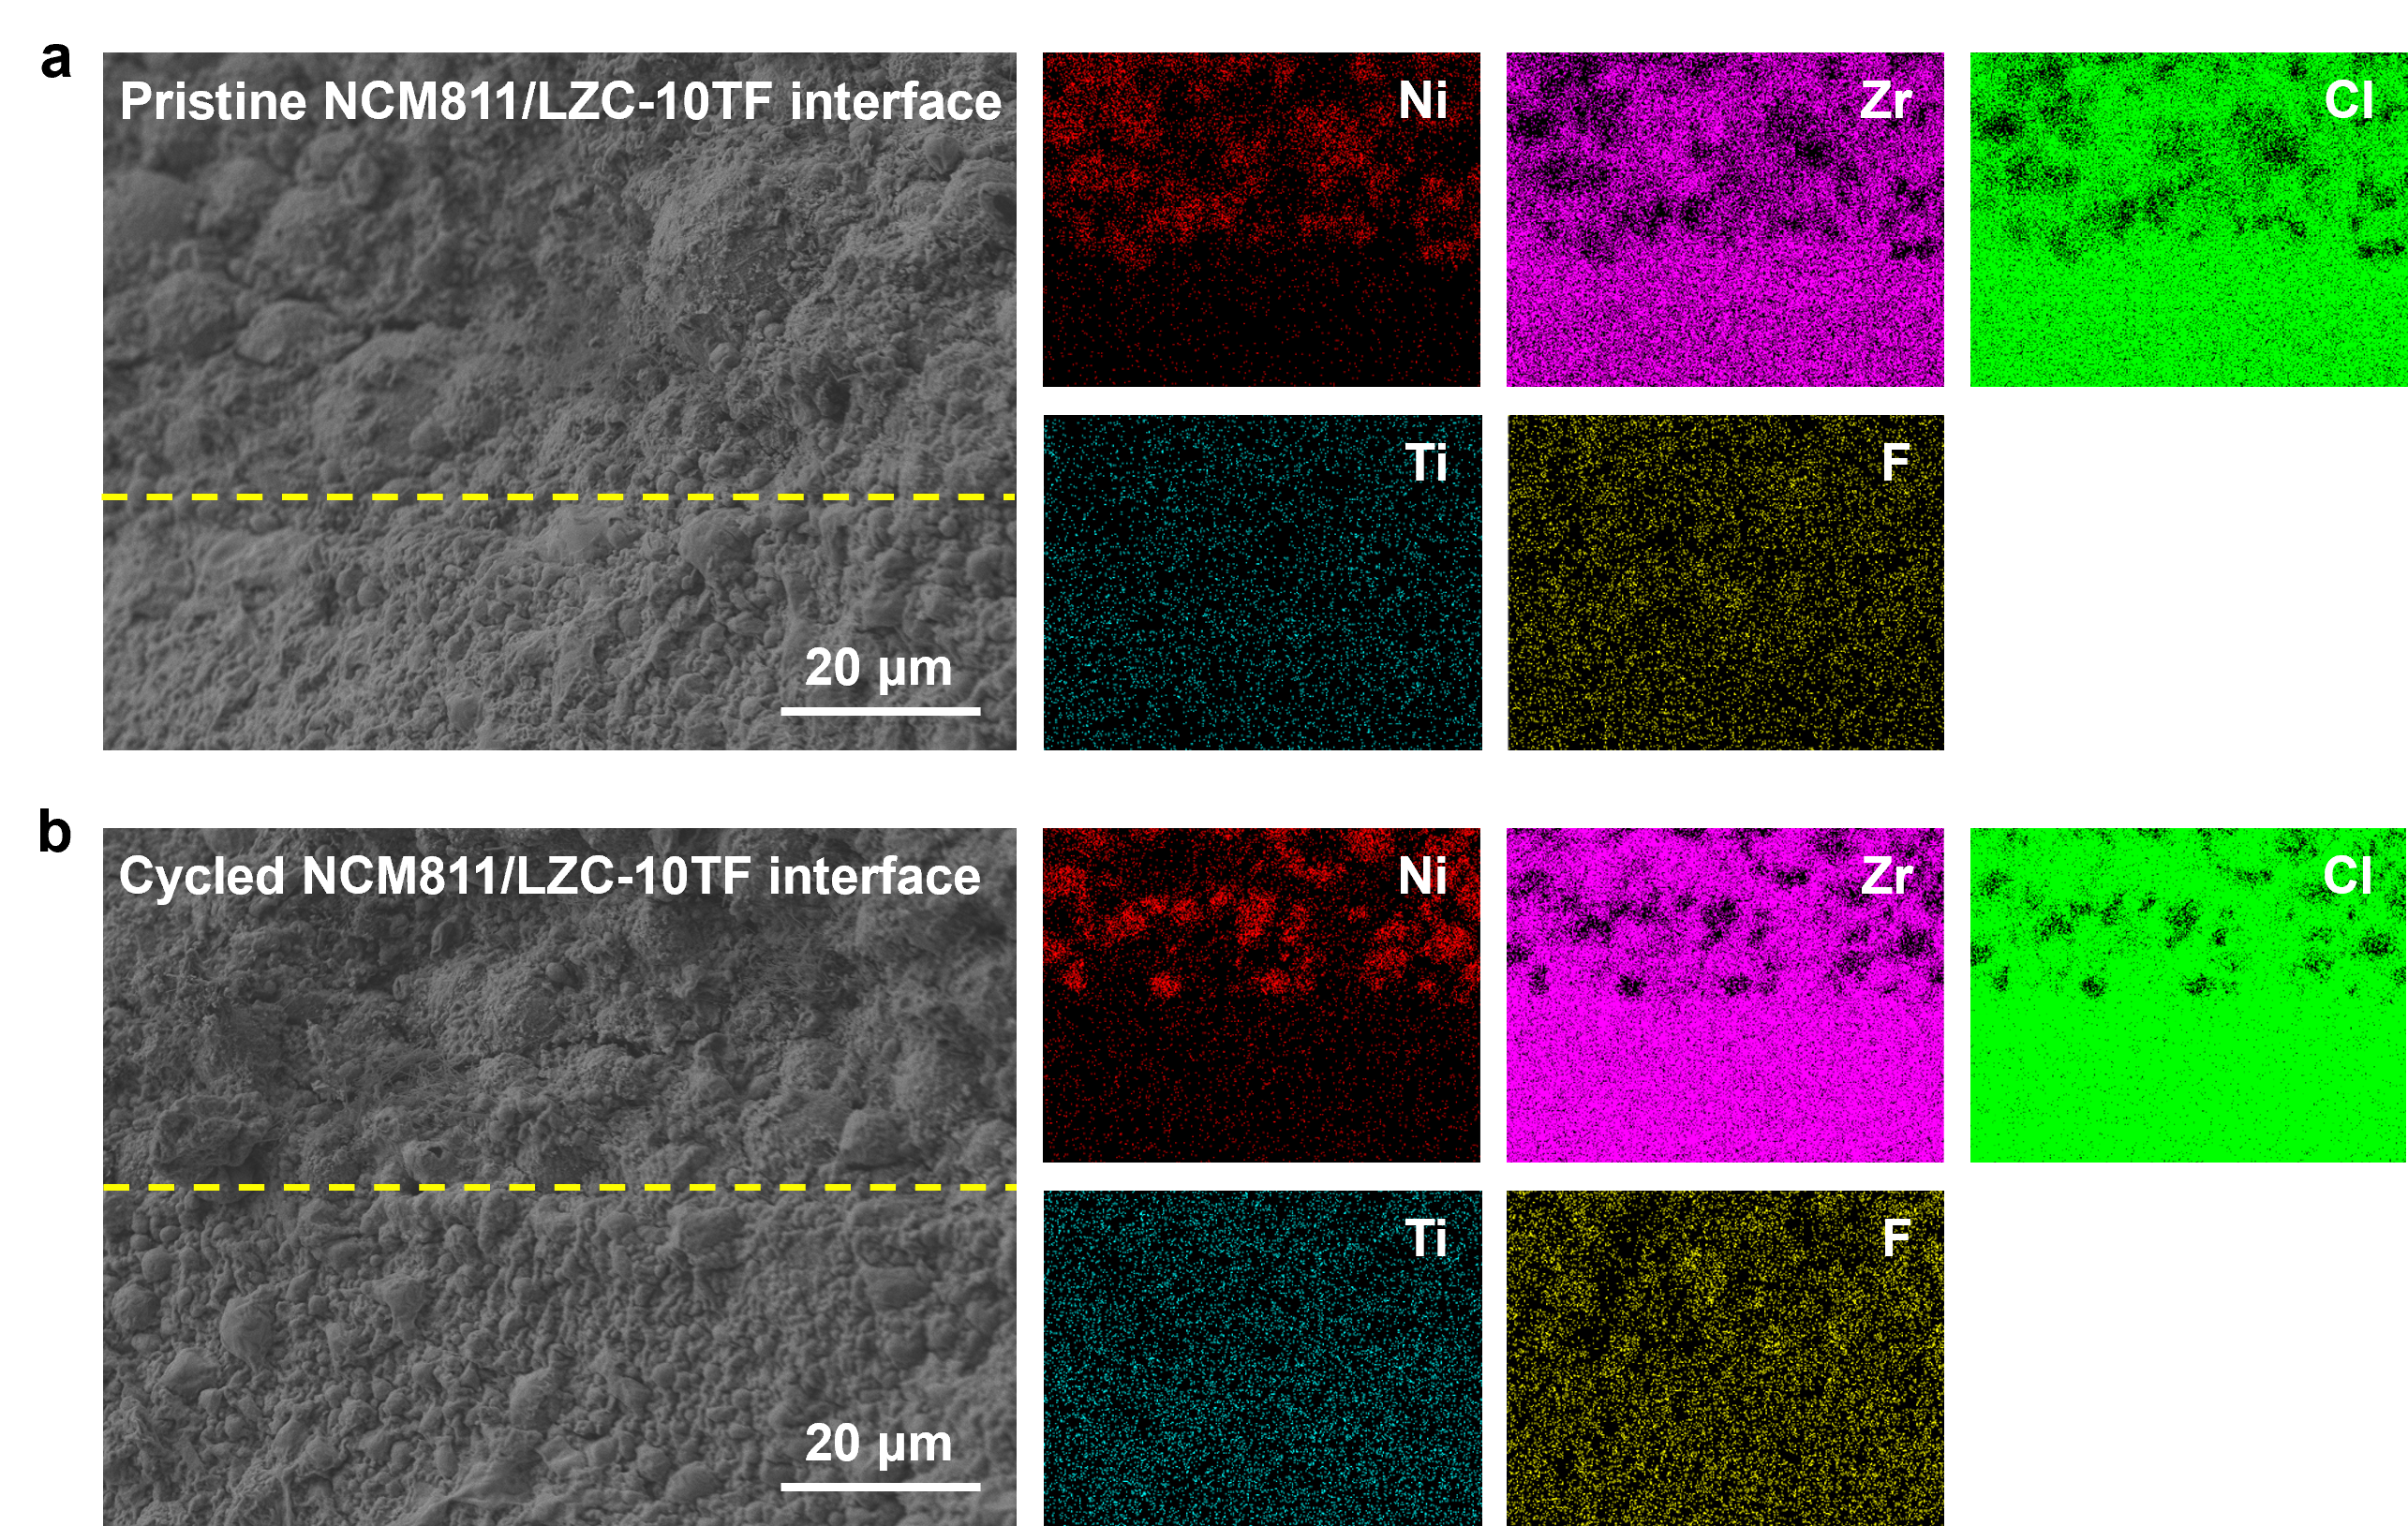


**Supplementary Fig. 42 | a,b** Typical cross-sectional SEM images and elemental analysis of the pristine (**a**) and cycled (**b**) NCM811 cathode/LZC-10TF electrolyte interfaces in NCM811/LZC-10TF/Li cells (NCM811 loading: 8.9 mg cm−2).

**
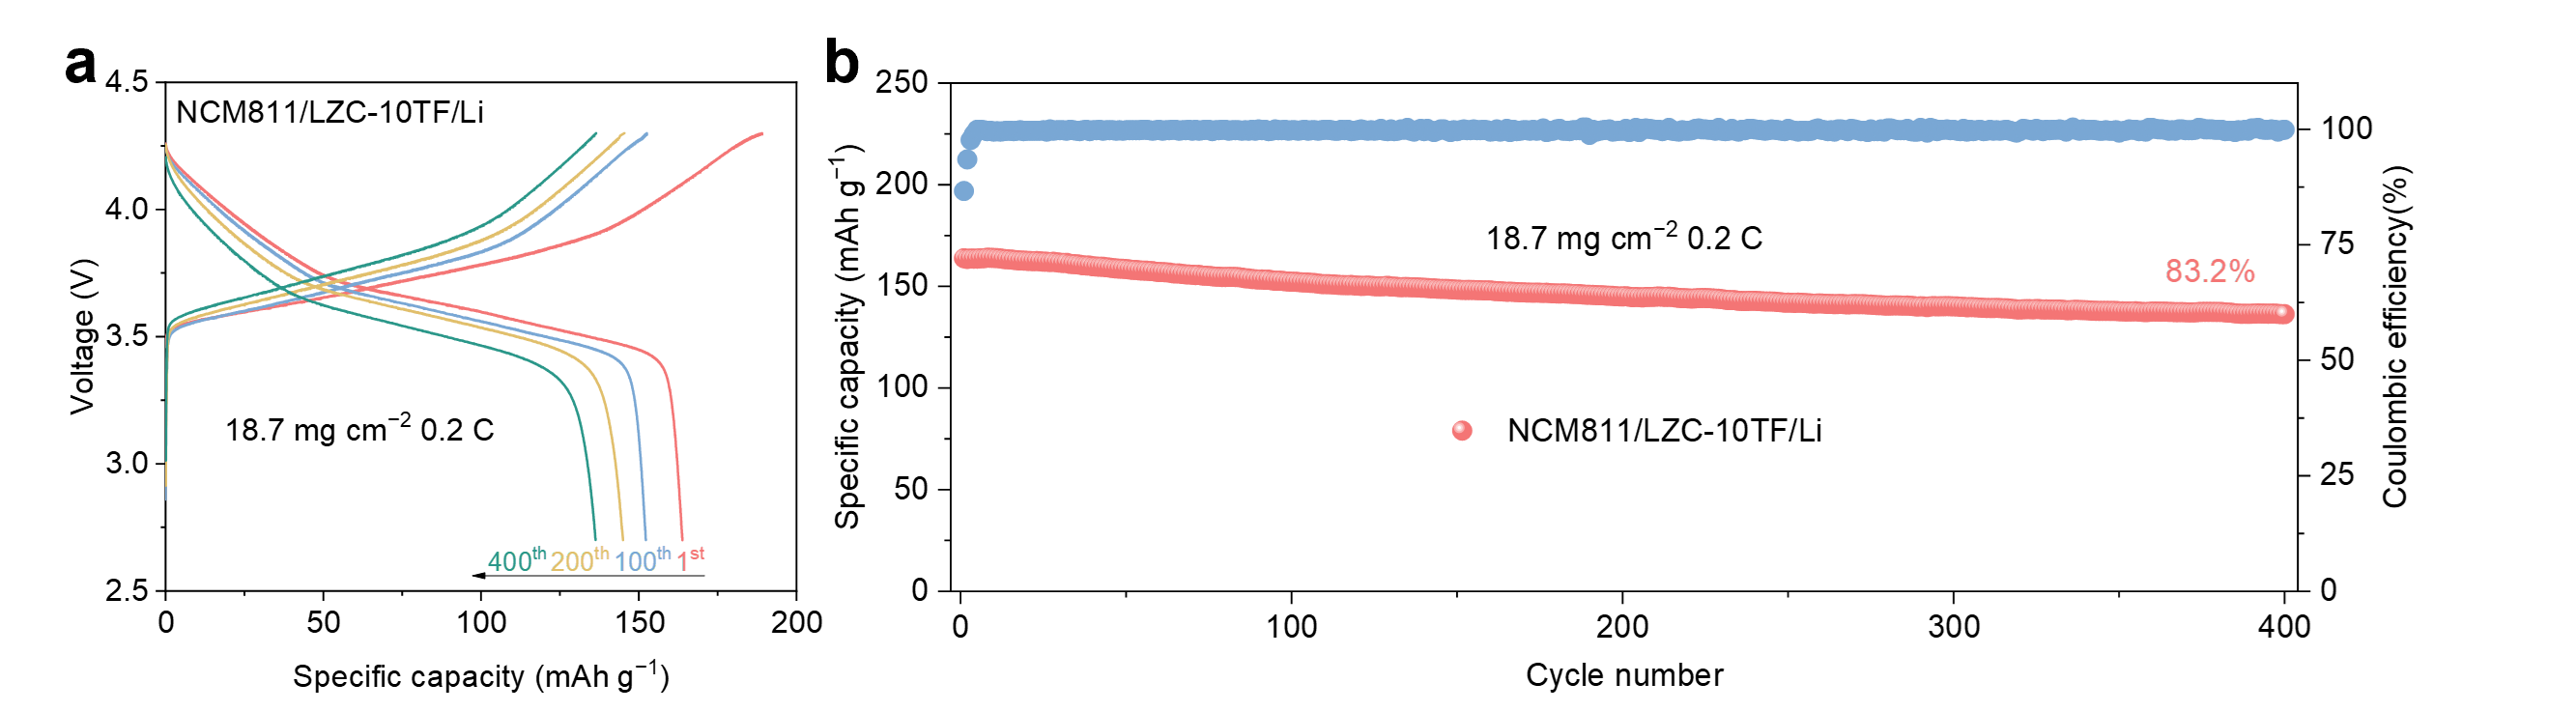
**

**Supplementary Fig. 43 | a,b** Charge-discharge curves (**a**) and cycling performances of the high NCM811 loading (18.7 mg cm−2) NCM811/LZC-10TF/Li cell at 0.2 C and 25 ℃.


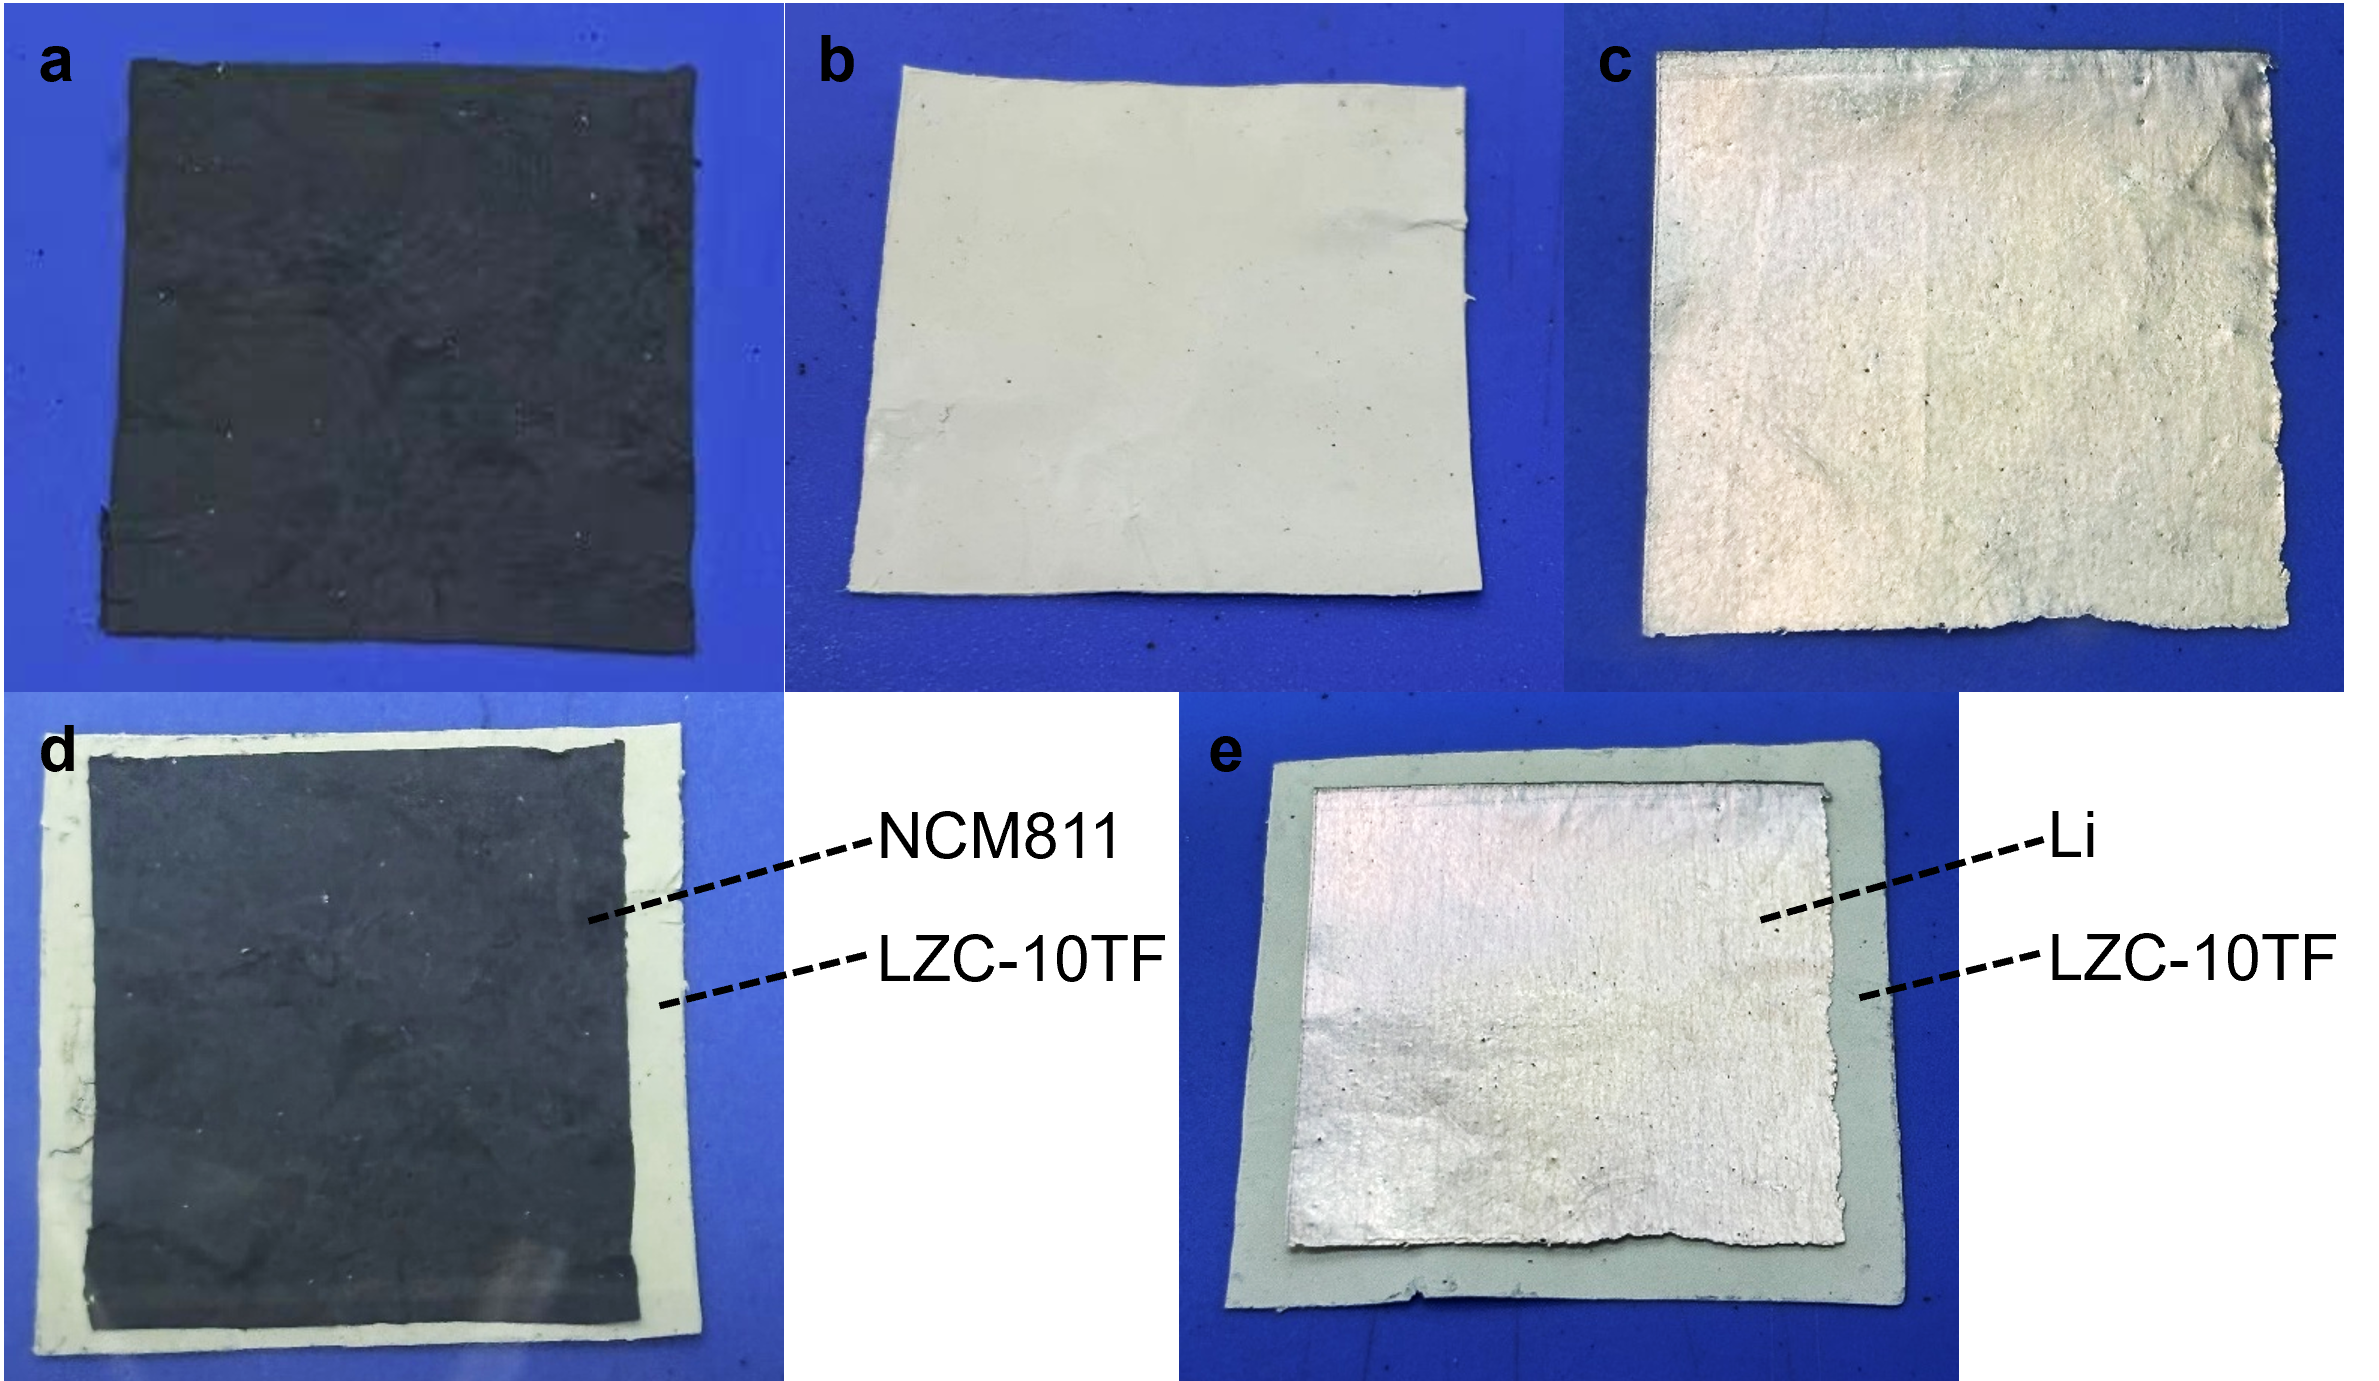


**Supplementary Fig. 44 | a-c** Optical images of the freestanding dry films: NCM811 cathode (**a**), LZC-10TF electrolyte (**b**), and Li anode (**c**). **d**,**e** images of the assembled dry-film based pouch cell with the configuration NCM811/LZC-10TF/Li before cycling. Specifications for the films are as follows: NCM811 film (mass ~630 mg, ~300 μm thickness, 4.5 cm × 4.2 cm area), LZC-10TF film (mass ~270 mg, ~100 μm thickness, 5.0 cm × 5.0 cm area), and Li foil (mass ~85 mg, ~100 μm thickness, 4.0 cm × 4.0 cm area).


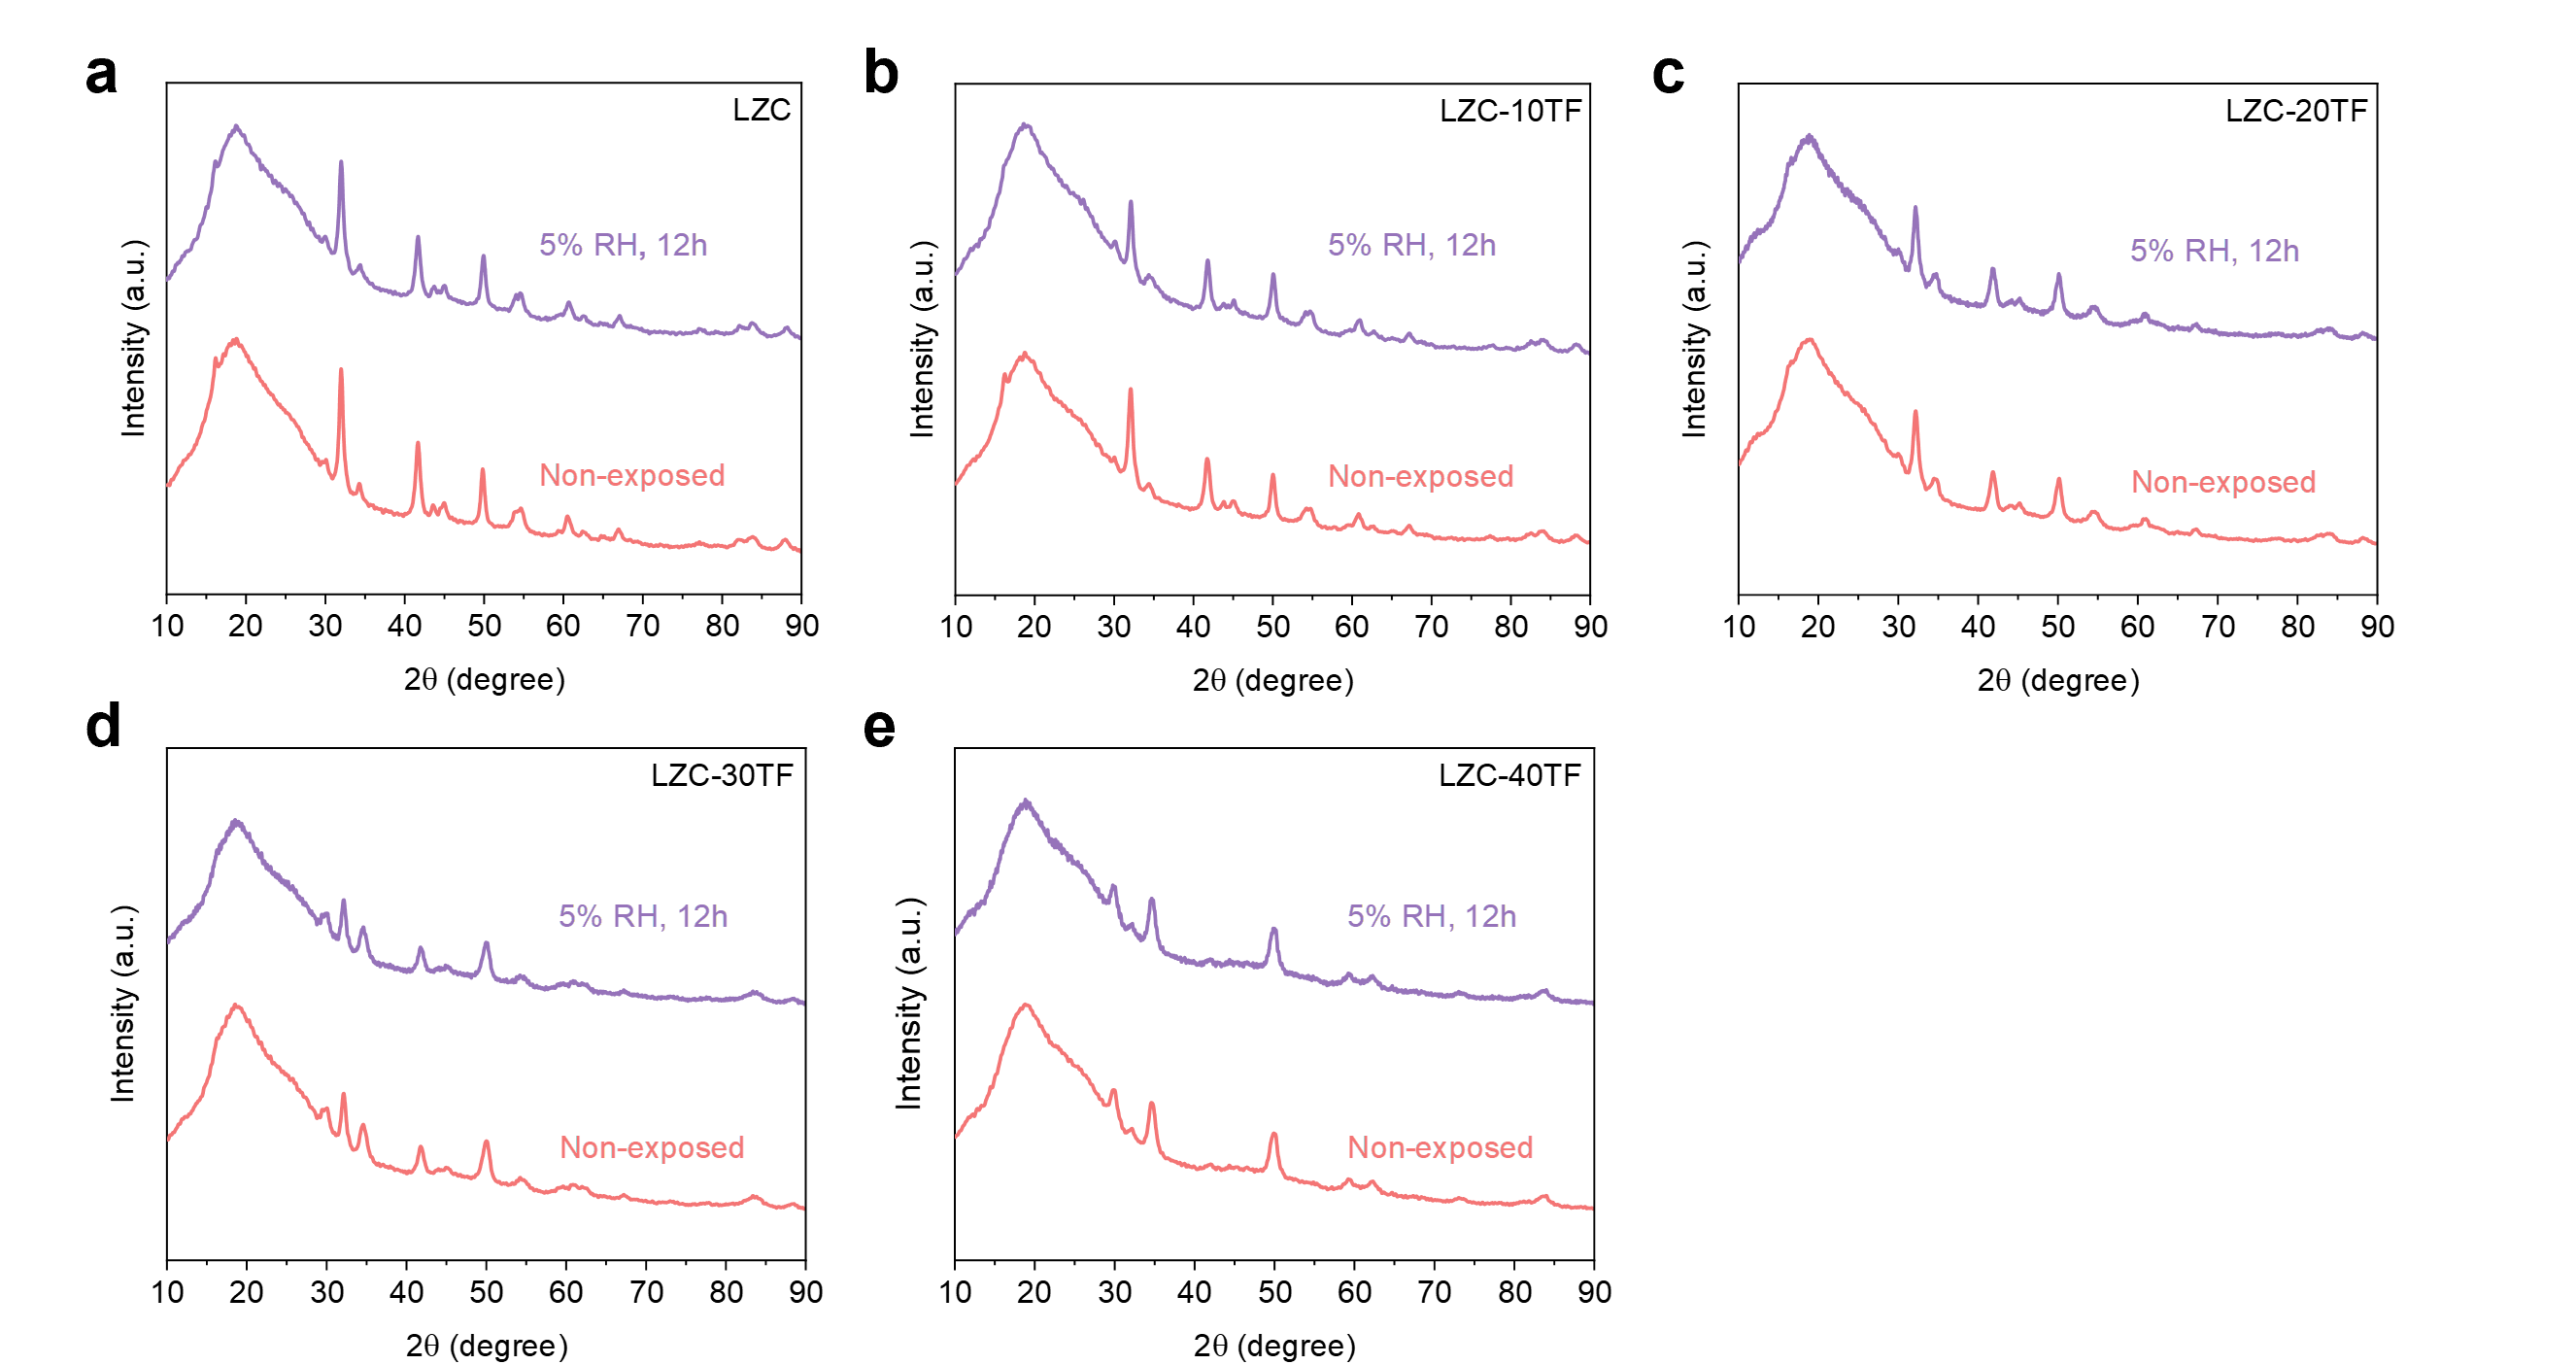


**Supplementary Fig. 45 | Humidity tolerance of LZC-xTF.** **a-e** XRD patterns of LZC (**a**), LZC-10TF (**b**), LZC-20TF (**c**), LZC-30TF (**d**), and LZC-40TF (**e**) before and after being exposed to the atmosphere with 5% RH.

**Discussion:** To examine the humidity resistance of LZC-xTF HSEs (where x = 0, 10, 20, 30, 40), they were exposed to air with 5% RH. After exposure to air with 5% RH for 12 h, the crystal structure of the various LZC-xTF HSEs all remained unaltered from the XRD patterns (**Supplementary Fig. 45**), indicating that the TiF3-doping strategy effectively retains the humidity resistance intrinsic to LZC.


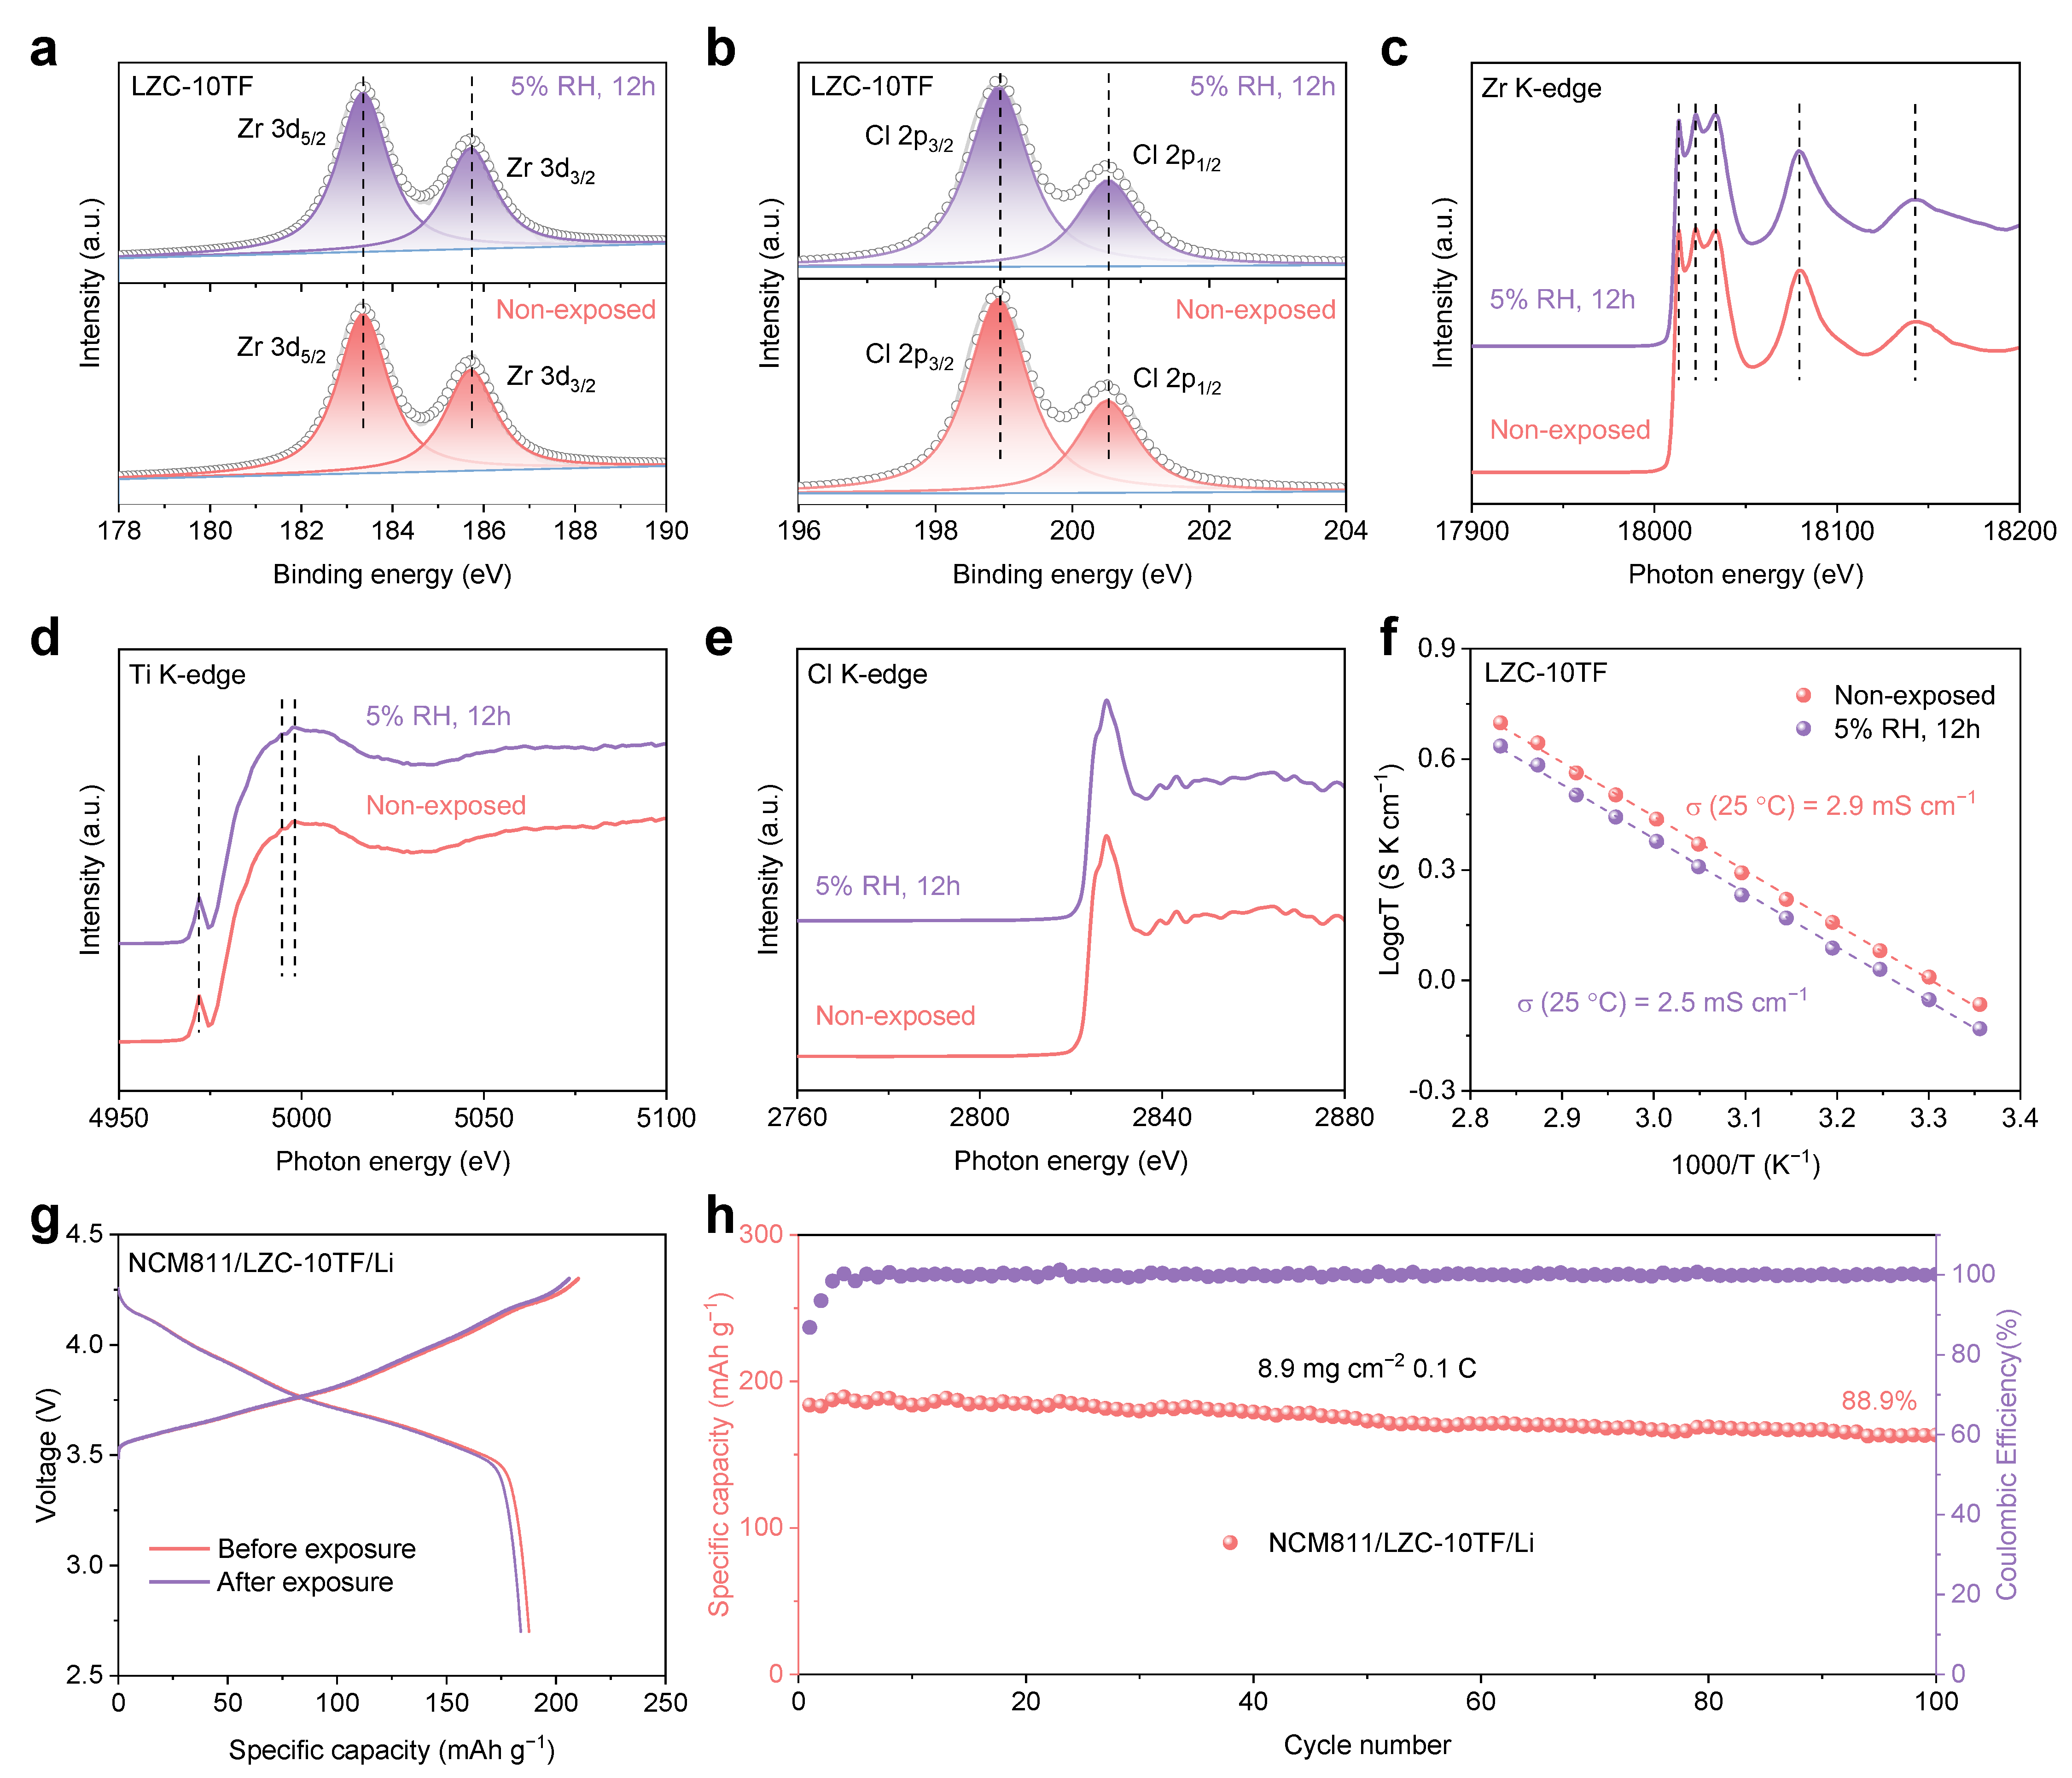


**Supplementary Fig. 46 | Humidity tolerance of LZC-10TF.** **a**,**b** Zr 3d (**a**) and Cl 2p (**b**) XPS of the LZC-10TF before and after being exposed to the atmosphere with 5% RH. **c-e** XANES of Zr K-edge (**c**), Ti K-edge (**d**), and Cl K-edge (**e**) of the LZC-10TF before and after being exposed to the atmosphere with 5% RH. **f** Arrhenius plots of the LZC-10TF before and after being exposed to the atmosphere with 5% RH. **g** Initial voltage profiles of NCM811/LZC-10TF/Li ASSLMBs with LZC-10TF before and after air exposure to 5% RH for 12 h. **h** Cycling performance of the NCM811/LZC-10TF/Li battery at 0.1C with LZC-10TF after air exposure (5% RH).

**Discussion:** To ascertain whether the LZC-10TF HSEs can satisfy the processing demands of dry room manufacturing, their resistance toward humid air was further probed. The unaltered crystal structure of LZC-10TF HSEs is also corroborated by XPS analysis, which revealed no noticeable change in the Zr 3d and Cl 2p spectra of the LZC-10TF HSEs after humidity exposure (**Supplementary Fig. 46a-b**). Therefore, the change caused by the moisture, if any, is too trivial to be detected by either XRD or XPS. Given this, XANES measurements were further performed to validate the structure stability of LZC-10TF HSEs after exposure to humid air with 5% RH. Encouragingly, neither the peak intensity nor the peak-energy-position shift of Zr *K*-edge, Ti *K*-edge, and Cl *K*-edge for LZC-10TF HSEs presents any noticeable variation after humidity exposure (**Supplementary Fig. 46c-e**), further demonstrating the superior hydrolysis resistance of the prepared LZC-10TF electrolyte. Consistent with these observations, the prepared LZC-10TF retained its high ionic conductivity (2.5 mS cm⁻1) even after the exposure (**Supplementary Fig. 46f**). Additionally, the performance of ASSLMBs assembled with the air-exposed LZC-10TF was also examined, as depicted in **Supplementary Fig. 46g-h**. The cell delivers negligible loss of capacity compared with that of the electrolyte before exposure and presents remarkable cycling stability over 100 cycles at 0.1 C. Humidity tolerance and electrochemical performance of LZC-10TF (**Supplementary Fig. 45-46**) highlight that LZC-10TF possesses great potential for large-scale manufacturing in dry rooms and is attractive for deployment in state-of-the-art, high-energy battery systems.

**
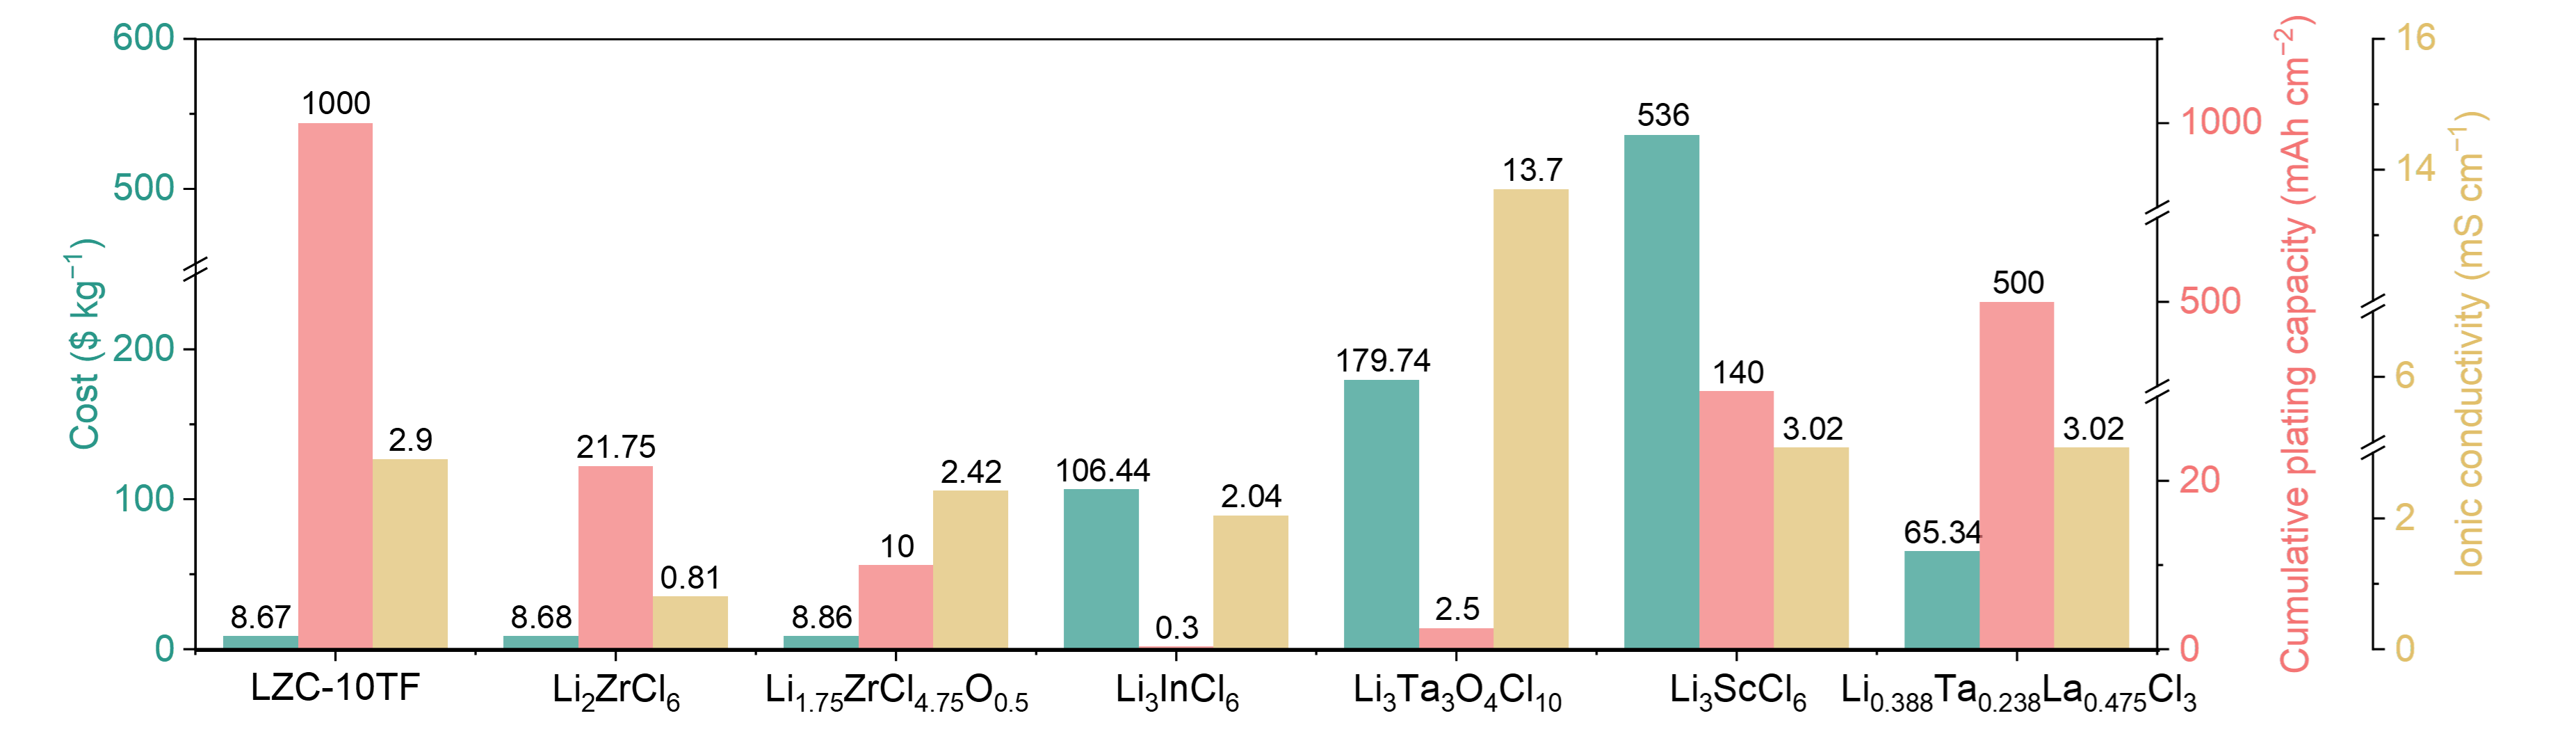
**

**Supplementary Fig. 47 |** Comprehensive comparative analysis of cost, ionic conductivity, Li-metal stability (evaluated by cumulative plating capacity) between LZC-10TF and currently typical HSEs. Material prices were estimated based on elemental prices sourced from **Supplementary Table 10**. The same methodology was applied to calculate the prices of electrolytes in the previous studies (Supplementary Fig. 21 in Xueliang Sun*, et al., *Science*, 2025, 390, 199-204). In addition, this method was previously used to calculate the prices of commercial cathode materials, including LiNi0.8Co0.15Al0.05O2 (NCA: 14.7 $ kg⁻1), LiCoO2 (LCO: 23.3 $ kg⁻1), and LiNi0.6Co0.2Mn0.2O2 (NCM622: 13.9 $ kg⁻1). These estimated values are highly consistent with those reported in the literature6, further confirming the reliability of our cost analysis.

**Discussion:** To rigorously evaluate the practical viability of the LZC-10TF electrolyte, we conducted a comprehensive comparative analysis focusing on material cost, ionic conductivity, and Li-metal stability (evaluated by cumulative plating capacity), as summarized in **Supplementary Fig. 47 and** **Table 11**. **Regarding economic competitiveness**, the raw material cost of LZC-10TF is estimated at approximately $8.67 kg⁻1, which is on par with Li2ZrCl6 ($8.68 kg⁻1)—widely recognized as one of the most cost-effective HSEs. This cost provides a significant economic advantage over typical In-, Ta-, Sc-based halides, such as the Li3InCl6 ($106.44 kg⁻1), Li3Ta3O4Cl10 ($179.74 kg⁻1), and Li3ScCl6 ($536 kg⁻1). **Regarding ionic conductivity**, although Li3Ta3O4Cl10 exhibits the highest reported ionic conductivity (13.7 mS cm⁻1) among HSEs, its poor compatibility with Li metal (cumulative plating capacity of only 2.5 mAh cm⁻2) severely restricts its application in ASSLMBs. In contrast, LZC-10TF delivers a satisfactory ionic conductivity of 2.9 mS cm⁻1, higher than that of the Li-unstable Li1.75ZrCl4.75O0.5 (2.42 mS cm⁻1). **Regarding Li-metal stability**, LZC-10TF demonstrates exceptional interfacial compatibility against Li metal, achieving an unprecedented cumulative Li plating capacity of 1000 mAh cm⁻2. This performance surpasses that of Li0.388Ta0.238La0.475Cl3 (500 mAh cm⁻2), which was previously reported as the best Li-metal-compatible halide electrolyte. Consequently, LZC-10TF stands out as the most promising candidate for practical ASSLMBs, successfully reconciling the trade-offs between low cost, high ionic conductivity, and superior Li-metal stability.

**3. Supplementary Tables**

**Supplementary Table 1.** Comparison of the ionic conductivity of the prepared LZC-10TF electrolyte with previous HSEs.

| Space Group | Electrolytes | Ionic conductivity (25 ℃; mS cm−1) | Reference |
| --- | --- | --- | --- |
|  | **LZC-10TF** | **2.9** | **This work** |
| Li3YCl6 | 0.51 | 7 |
| Li3TbCl6 | 0.22 | 8 |
| Li3ErCl6 | 0.31 | 9 |
| Li3DyCl6 | 0.12 | 8 |
| Li3HoCl6 | 0.29 | 10 |
| Li3TmCl6 | 0.11 | 8 |
| Li3YbCl6 | 0.1 | 11 |
| Li2ZrCl6 | 0.81 | 1 |
| Li3Er0.95In0.05Cl6 | 0.33 | 12 |
| Li2ZrCl5.5F0.5 | 0.16 | 13 |
| Li2.25Zr0.75Fe0.25Cl6 | 0.98 | 14 |
| Li3ZrCl4O1.5 | 1.35 | 15 |
| Li3Y0.2Zr0.6Cl6 | 1.19 | 16 |
| Li2.4Y0.4Hf0.6Cl6 | 1.49 | 17 |
| ZrO2-2LiCl-Li2ZrCl6 | 1.3 | 18 |
| Li2.6Er0.6Zr0.4Cl6 | 1.13 | 19 |
| Li2.2Zr0.9Cu0.1Cl6 | 0.75 | 20 |
| Li2.4Zr0.8Zn0.2Cl6 | 0.93 | 21 |
| Li2.25Zr0.75Al0.25Cl6 | 1.13 | 22 |
| Li1.7Zr0.7Ta0.3Cl6 | 1.68 | 23 |
| Li2.1Zr0.8Dy0.15Ta0.05Cl6 | 1.67 | 24 |
| Li2.1Zr0.6Al0.2Y0.2Cl5.7 | 1.81 | 25 |
| Li2Zr0.75Ta0.2Cl6 | 1.74 | 26 |
| Li1.75ZrCl4.75O0.5 | 2.42 | 27 |
|  | Li3YBr6 | 1.7 | 7 |
| Li3YBr5.7F0.3 | 1.8 | 28 |
| Li3YBr2Cl4 | 1.27 | 29 |
| Li3GdBr6 | 1.4 | 30 |
| Li2.73Ho1.09Cl3.27Br2.73 | 3.8 | 31 |
| Li3HoCl3Br3 | 4.1 | 32 |
| Li3YBr3Cl3 | 7.2 | 32 |
| Li3TiCl6 | 1.04 | 33 |
| Li3InCl6 | 2.04 | 34 |
| Li3ScCl6 | 3.02 | 35 |
| Li3InCl4.8F1.2 | 0.51 | 36 |
| Li2.375Sc0.375Hf0.625Cl6 | 1.1 | 37 |
| Li2.375Sc0.375Zr0.625Cl6 | 2.2 | 37 |
| Li3Zr0.75OCl4 | 1.35 | 38 |
| Li2.5Sc0.5Zr0.5Cl6 | 2.23 | 39 |
| Li2In1/3Sc1/3Cl4 | 2.0 | 40 |
| Li2.7Zr0.3In0.7Cl6 | 2.1 | 41 |
| Li3Y0.5In0.5Cl6 | 1.51 | 42 |
| Li3Er0.6In0.4Cl6 | 3.0 | 12 |
| Li2.6In0.8Ta0.2Cl6 | 4.47 | 43 |
| Li3Ho0.7Sc0.3Cl6 | 4.7 | 12 |
| Li2.75Y0.16Er0.16Yb0.16In0.25Zr0.25Cl6 | 1.171 | 44 |
| Li2.833In0.167Yb0.167Sc0.167Y0.167Lu0.167Zr0.167Cl6 | 2.2 | 45 |
| Li2.2In0.2Sc0.2Zr0.2Hf0.2Ta0.2Cl6 | 4.69 | 46 |
| Li2.9Zr0.1In0.9Cl5.6F0.4 | 1.5 | 47 |
|  | Li3LuCl6 | 0.1 | 48 |
| Li2.6Zr0.4(Ho/Lu)0.6Cl6 | 1.8 | 48 |
| Li3YbCl6 | 0.32 | 8 |
| Li3DyCl6 | 0.9 | 8 |
| Li2.65YCl5.65 | 0.308 | 49 |
| Li2.727Ho1.091Cl6 | 1.3 | 10 |
| Li2.60Yb0.60Hf0.40Cl6 | 1.2 | 50 |
| Li2.556Yb0.492Zr0.492Cl6 | 1.58 | 51 |
| Li2.633Er0.633Zr0.367Cl6 | 1.1 | 52 |
| Li2.5Y0.5Zr0.5Cl6 | 1.4 | 52 |

**Supplementary Table 2.** Rietveld refinement results from the XRD pattern of LZC-10TF. The space group is ; the refined lattice parameters are a = 10.9625 Å, c = 5.9256 Å, and V= 616.71 Å3.

| Atom | *x* | *y* | *z* | Occupancy | Site | Uiso (Å2) |
| --- | --- | --- | --- | --- | --- | --- |
| Li1 | 0.3062 | 0 | 0 | 0.2459 | 6g | 0.0272 |
| Li2 | 0.3248 | 0 | 0.5 | 0.8041 | 6h | 0.0221 |
| Zr1 | 0 | 0 | 0 | 0.6642 | 1a | 0.0032 |
| Zr2 | 0.3333 | 0.6667 | 0.5160 | 0.6327 | 2d | 0.0042 |
| Zr3 | 0 | 0 | 0.5 | 0.4318 | 1b | 0.0026 |
| Zr4 | 0.3333 | 0.6667 | 0.9404 | 0.1693 | 2d | 0.0019 |
| Ti1 | 0 | 0 | 0 | 0.0265 | 1a | 0.0032 |
| Ti2 | 0.3333 | 0.6667 | 0.5160 | 0.0492 | 2d | 0.0042 |
| Ti3 | 0 | 0 | 0.5 | 0.0613 | 1b | 0.0026 |
| Ti4 | 0.3333 | 0.6667 | 0.9404 | 0.0569 | 2d | 0.0022 |
| Cl1 | 0.1099 | -0.1099 | 0.7669 | 0.9836 | 6i | 0.0154 |
| Cl2 | 0.2234 | -0.2234 | 0.2527 | 0.9572 | 6i | 0.0121 |
| Cl3 | 0.4439 | -0.4439 | 0.7389 | 0.9092 | 6i | 0.0106 |
| F1 | 0.1099 | -0.1099 | 0.7669 | 0.0158 | 6i | 0.0154 |
| F2 | 0.2234 | -0.2234 | 0.2527 | 0.0434 | 6i | 0.0121 |
| F3 | 0.4439 | -0.4439 | 0.7389 | 0.0908 | 6i | 0.0106 |

**Supplementary Table 3.** Rietveld refinement results from the XRD pattern of LZC. The space group is ; the refined lattice parameters are a = 10.9737 Å, c = 5.9308 Å, and V= 618.51 Å3.

| Atom | *x* | *y* | *z* | Occupancy | Site | Uiso (Å2) |
| --- | --- | --- | --- | --- | --- | --- |
| Li1 | 0.3198 | 0 | 0 | 0.1583 | 6g | 0.0216 |
| Li2 | 0.3289 | 0 | 0.5 | 0.8417 | 6h | 0.0182 |
| Zr1 | 0 | 0 | 0 | 0.5957 | 1a | 0.0243 |
| Zr2 | 0.3333 | 0.6667 | 0.5193 | 0.6314 | 2d | 0.0331 |
| Zr3 | 0 | 0 | 0.5 | 0.4824 | 1b | 0.0134 |
| Zr4 | 03333 | 0.6667 | 0.9605 | 0.3295 | 2d | 0.0173 |
| Cl1 | 0.1103 | -0.1103 | 0.7477 | 1 | 6i | 0.0176 |
| Cl2 | 0.2243 | -0.2243 | 0.2733 | 1 | 6i | 0.0146 |
| Cl3 | 0.4446 | -0.4446 | 0.7369 | 1 | 6i | 0.0098 |

**Supplementary Table 4.** EXAFS data fitting results of the samples.

| Sample | Path | *CNa* | *R*(Å)*b* | *σ*2 (Å2)*c* | Δ*E*0(eV)*d* | *R* factor |
| --- | --- | --- | --- | --- | --- | --- |
| Ti K-edge (*Ѕ*02=0.738) | | | | | | |
| Ti foil | Ti-Ti | 12.0* | 2.909 | 0.0079 | 5.4 | 0.0075 |
| TiT3 | Ti-F | 5.7 | 1.997 | 0.0130 | -0.5 | 0.0188 |
| LZC-10TF | Ti-F | 4.0 | 1.988 | 0.0090 | 4.3 | 0.0268 |
| Ti-Cl | 1.7 | 2.367 |

*aCN*, coordination number; *bR*, the distance between absorber and backscatter atoms; *cσ*2, the Debye-Waller factor value; *dΔE*0, inner potential correction to account for the difference in the inner potential between the sample and the reference compound; *R* factor indicates the goodness of the fit. *S*02 was fixed to 0.738, according to the experimental EXAFS fit of Ti foil by fixing *CN* as the known crystallographic value. * This value was fixed during EXAFS fitting, based on the known structure of Ti. Fitting conditions: *k* range: 1.0-6.0; *R* range: 1.0-3.0; fitting space: R space; *k*-weight = 3. A reasonable range of EXAFS fitting parameters: 0.700 < *Ѕ*02 < 1.000; *CN >* 0; *σ*2 > 0 Å2; |Δ*E*0| < 15 eV; *R* factor < 0.02.

**Supplementary Table 5.** EXAFS data fitting results of Zr K-edge for Zr foil, LZC, and LZC-10TF.

| Sample | Path | *CNa* | *R*(Å)*b* | *σ*2 (Å2)*c* | Δ*E*0(eV)*d* | *R* factor |
| --- | --- | --- | --- | --- | --- | --- |
| Zr K-edge (*Ѕ*02=0.896) | | | | | | |
| Zr foil | Zr-Zr | 12.0* | 3.207 | 0.0089 | 4.2±0.5 | 0.0130 |
| LZC | Zr-Cl | 6.0 | 2.478 | 0.0033 | 2.5±2.2 | 0.0189 |
| LZC-10TF | Zr-F | 0.9 | 1.922 | 0.0067 | -1.7±1.3 | 0.0067 |
| Zr-Cl | 5.2 | 2.451 |

*aCN*, coordination number; *bR*, the distance between absorber and backscatter atoms; *cσ*2, the Debye-Waller factor value; *dΔE*0, inner potential correction to account for the difference in the inner potential between the sample and the reference compound; *R* factor indicates the goodness of the fit. *S*02 was fixed to 0.896, according to the experimental EXAFS fit of Zr foil by fixing *CN* as the known crystallographic value. * This value was fixed during EXAFS fitting, based on the known structure of Zr. Fitting conditions: *k* range: 2.0-10.0; *R* range: 1.1-2.3; fitting space: R space; *k*-weight = 3. A reasonable range of EXAFS fitting parameters: 0.800 < *Ѕ*02 < 1.000; *CN >* 0; *σ*2 > 0 Å2; |Δ*E*0| < 15 eV; *R* factor < 0.02.

**Supplementary Table 6.** Performance comparison of Li symmetric cells with HSEs.

| Cell structure | Current density (mA cm−2) | Capacity  (mAh cm−2) | Number of cycles | Cumulative plating capacity (mAh cm−2) | Test temperature (℃) | Reference |
| --- | --- | --- | --- | --- | --- | --- |
| **Li/LZC-10TF/Li** | **1** | **1** | **1000** | **1000** | **25** | **This work** |
| Li/Li2ZrCl6/Li | 0.5 | 0.25 | 87 | 21.75 | 25 | 1 |
| Li/Li1.75ZrCl4.75O0.5/Li | 0.1 | 0.05 | 200 | 10 | 25 | 27 |
| Li/Li0.388Ta0.238La0.475Cl3/Li | 0.2 | 1.0 | 500 | 500 | 30 | 53 |
| Li/Li4YI7/Li | 0.1 | 0.1 | 500 | 50 | 25 | 54 |
| Li/LiAlCl4/Li | 0.1 | 0.1 | 80 | 8 | 25 | 55 |
| Li/Li3ScCl6/Li | 0.1 | 0.5 | 280 | 140 | 25 | 35 |
| Li/Li3HoBr3Cl3/Li | 0.1 | 0.1 | 400 | 40 | 25 | 56 |
| Li/Li3YBr6/Li | 0.1 | 0.1 | 250 | 25 | 25 | 28 |
| Li/Li2ZrCl5.5F0.5/Li | 0.1 | 0.025 | 1600 | 40 | 25 | 13 |
| Li/Li2ZrCl5.2F0.8/Li | 0.1 | 0.5 | 210 | 105 | 25 | 57 |
| Li/Li3YBr5.7F0.3/Li | 0.75 | 0.75 | 500 | 375 | 25 | 28 |
| Li/Li3AlF5.87Cl0.13/Li | 0.05 | 0.05 | 250 | 12.5 | 60 | 58 |
| Li/Li7N2I-0.5LiOH/Li | 0.2 | 0.2 | 250 | 125 | 25 | 59 |
| Li/Li3YCl6/Li | 0.2 | 0.2 | 36 | 7.2 | 25 | 60 |
| Li/Li6PS5Cl/Li3YCl6/Li6PS5Cl/Li | 0.2 | 0.2 | 500 | 100 | 25 | 60 |
| Li/Li3InCl6/xPBO-SPE@Li | 0.1 | 0.1 | 550 | 55 | 30 | 61 |
|  | 1.0 | 1.0 | 100 | 100 | 30 |  |
| LixIny-LiCl@Li/Li3InCl6/LixIny-LiCl@Li | 1.0 | 0.5 | 400 | 200 | 25 | 62 |
| βLi3N-Li/LZC|βLi3N-Li | 0.2 | 0.1 | 300 | 30 | 25 | 63 |
| Li/Li7P3S11/Li3InCl6/Li7P3S11/Li | 0.1 | 0.1 | 350 | 35 | 25 | 64 |
| Li/Li6PS5Cl/Li0.388Ta0.238La0.475Cl3/Li6PS5Cl/Li | 0.2 | 0.2 | 1500 | 300 | 30 | 65 |
|  | 0.5 | 0.5 | 250 | 125 | 30 |  |
| LPON@Li/Li2ZrCl6/LPON@Li | 0.1 | 0.05 | 2000 | 100 | 25 | 66 |
| Li/Li1.75Zr0.75Nb0.25Cl6/Li | 0.5 | 0.5 | 300 | 150 | 25 | 67 |
| Li/Li3YbCl6/Li | 0.05 | 0.025 | 16 | 0.4 | 25 | 68 |
| Li/Li3YbCl6@PI3/Li | 0.2 | 0.2 | 100 | 20 | 25 | 68 |
| Li/Li3LuCl6@PI3/Li | 0.5 | 0.25 | 400 | 100 | 25 | 68 |
| Li/Li2ZrCl4I2/Li | 0.2 | 0.1 | 6000 | 600 | 25 | 69 |
| Li/Li3InCl6/Li | 0.05 | 0.05 | 24 | 1.2 | 25 | 70 |
| Li-Ag/Li3InCl6/Li-Ag | 0.1 | 0.1 | 250 | 25 | 25 | 70 |
| Li/Li2ZrIn1.85Cl6F5.55/Li2ZrCl6/Li2ZrIn1.85Cl6F5.55/Li | 0.1 | 0.1 | 1500 | 150 | 30 | 71 |
| Li/PEO/Li2TiF6/PEO/Li | 0.1 | 0.1 | 500 | 50 | 60 | 72 |
| Li/LiF-ZrF4@Li2ZrCl6/Li | 0.1 | 0.1 | 400 | 40 | 25 | 73 |
| Li/Li3Y(BrCl)3/Li | 0.225 | 0.225 | 500 | 112.5 | 25 | 74 |
| Li/Li2.25ZrCl5.75S0.25/Li | 0.2 | 0.2 | 100 | 20 | 25 | 75 |
| BP-Li/Li3GaF5.3Cl0.7/BP-Li | 0.1 | 0.1 | 900 | 90 | 60 | 76 |
| Li/PEO/H-Li2TiF6/PEO/Li | 0.1 | 0.1 | 500 | 50 | 60 | 72 |
| Li/Li3YBr2Cl3.7F0.3/Li | 0.1 | 0.1 | 800 | 80 | 25 | 77 |
| Li/Li3YBr2Cl4/Li | 0.1 | 0.1 | 300 | 30 | 25 | 77 |
| Li/Li3YCl4Br2/Li | 0.1 | 0.5 | 100 | 50 | 25 | 78 |
| Li/Li3Ta3O4Cl10/Li | 0.1 | 0.1 | 25 | 2.5 | 25 | 79 |

**Supplementary Table 7.** Comparison of cathode active material loading and areal capacity in ASSLMBs using Li metal and HSEs.

| Cell structure | Cathode active materials loading (mg cm−2) | Discharge capacity (mAh g−1) | Areal capacity (mAh cm−2) | Total cycles (n)@current | Capacity decay rate per cycle (%) | Test temperature (℃) | Reference |
| --- | --- | --- | --- | --- | --- | --- | --- |
| **NCM811/LZC-10TF/Li** | **8.9** | **130.6** | **1.2** | **1000@1.0 C** | **0.014** | **25** | **This work** |
| **18.3** | **163.8** | **3.1** | **400@0.2 C** | **0.042** | **25** |
| **24.1** | **161.3** | **3.9** | **200@0.1 C** | **0.107** | **25** |
| LCO/Li3YBr5.7F0.3/Li | 10.0 | 121.6 | 1.22 | 70@0.14 mA cm−2 | 0.571 | 25 | 28 |
| NCM523/Li0.388Ta0.238La0.475Cl3/Li | 7.12 | 163 | 1.16 | 100@0.44 C | 0.184 | 30 | 53 |
| LFP/Li3AlF5.87Cl0.13/Li | 1.25 | 155.1 | 0.19 | 180@0.0875 mA cm−2 | 0.054 | 60 | 58 |
| NCM721/Li0.388Ta0.238La0.475Cl3/LPSC/Li | 3.57 | 170.5 | 0.61 | 200@0.5 C | 0.062 | 30 | 65 |
| LCO/Li3InCl6/xPBO-SPE@Li | 4.46 | 133.4 | 0.59 | 50@0.1 C | 0.206 | 30 | 61 |
| LCO/Li3InCl6/Li7N2I-0.5LiOH/Li | ~8.66 | ~165 | 1 | 500@0.1 C | 0.020 | 25 | 59 |
| NCM811/Li3InCl6/Li7N2I-0.5LiOH/Li | ~3.89 | ~180 | 1 | 300@0.1 C | 0.033 | 25 | 59 |
| NCM83/Li3InCl6/Li6PS5Cl/Li | 8.91 | 207 | 1.84 | 270@0.1 C | 0.066 | 25 | 80 |
| LCO/Li3LuCl6@PI3/Li | 3.56 | 140.6 | 0.5 | 200@0.2 mA cm−2 | 0.068 | 25 | 68 |

**Supplementary Table 8.** Comparison of cathode active material loading and areal capacity in ASSLMBs using Li metal and sulfide electrolyte.

| Cell structure | Cathode active material loading (mg cm−2) | Discharge capacity (mAh g−1) | Areal capacity (mAh cm−2) | Total cycles (n)@current | Capacity decay rate per cycle (%) | Test temperature (℃) | Reference |
| --- | --- | --- | --- | --- | --- | --- | --- |
| NCM83/Li5.3PS4.3ClBr0.7/Li | 8.92 | 152 | 1.36 | 300@0.2 C | 0.047 | 25 | 81 |
| LCO/Li7P3S11/Li-Ga+LiCl@Li | 3.82 | 116.4 | 0.44 | 100@0.1 C | 0.153 | 25 | 82 |
| LCO/Li6PS5Cl/DES@Li | 5.73 | 107.14 | 0.61 | 100@0.5 C | 0.243 | 25 | 83 |
| NCM811/Li3TCA+Li6PS5Cl/Li | 15 | 109.3 | 1.64 | 500@0.3 C | 0.106 | 25 | 84 |
| NCM622/Li6PS5Cl/CRI-alloy@Li | 13.93 | 142.37 | 1.98 | 300@0.3 C | 0.058 | 25 | 85 |
| NCM622/Li6PS5Cl/MCl@Li | 8.91 | 111 | 0.99 | 100@0.1 C | 0.063 | 25 | 86 |
| NCM712/Li5.5PS4.5Cl1.5/SnF2-Li | 1.78 | 113.1 | 0.2 | 500@0.5 C | 0.054 | 25 | 87 |
| NCM811/Li6PS5Cl/Li7N2I–Mg/Li | 11.5 | 191.6 | 2.2 | 350@0.5 C | 0.050 | 25 | 88 |
| LCO/Li6.3P0.9Mg0.1S5Cl0.8F0.2/Li | 2 | 113 | 0.23 | 100@0.1 C | 0.078 | 25 | 89 |
| NCM811/Li6PSC5Cl+Li6.4La3Zr1.4Ta0.6O12/Li | 7.5 | 81.9 | 0.61 | 200@1.0 C | 0.093 | 25 | 90 |
| NCM811/Li10GeP2S12/LFN@Li | 8.79 | 182.3 | 1.6 | 200@0.1 C | 0.087 | 25 | 91 |
| LCO/Li3InCl6/Li6PS5Cl/SL/Li | 8.91 | 137.5 | 1.23 | 100@0.3 C | 0.290 | / | 92 |
| LCO/Li5.54P0.98Bi0.02S4.47O0.03Cl1.5/Li | 1.78 | 156.6 | 0.28 | 150@0.2 C | 0.135 | 25 | 93 |
| LCO/5Li2S-3SiS2/Li | 5 | 107.8 | 0.54 | 100@0.1 C | 0.300 | 25 | 94 |
| NCM811/Li6.16P0.92In0.08S4.88O0.12Cl/Li | 8.91 | 161.6 | 1.44 | 100@0.1 C | 0.171 | 25 | 95 |
| NCM811/LPSDBM7/Li | 10.39 | 148.1 | 1.54 | 100@0.2 C | 0.170 | 60 | 96 |
| NCM523/Li3.12P0.94Bi0.06S3.91O0.09/Li | 4.41 | 127.5 | 0.56 | 50@0.1 C | 0.336 | 25 | 97 |
| NCM523/Li3.12P0.94Bi0.06S3.91O0.09/Li | 8.79 | 139.4 | 1.23 | 60@0.1 C | 0.190 | 25 | 98 |
| LCO/Li5.41PS4.41Cl1.59/Li3PO4-Li3N/Li | 4.85 | 132.6 | 0.64 | 80@0.1 C | 0.358 | 25 | 99 |
| LCO/Li5.6PS4.6I1.4/Li | 5.35 | 128.8 | 0.69 | 50@0.1 C | 0.408 | 25 | 100 |
| NCM83/Li4.125Si0.125P0.875S4I+Li5.4PS4.4Cl1.6/Li | 6.24 | 172.12 | 1.07 | 500@0.25 mA cm−2 | 0.035 | 25 | 101 |
| LCO/Li5.8P0.9Cu0.1S4.5Cl1.3Br0.2/Li | 5.54 | 112.6 | 0.62 | 400@0.2 C | 0.033 | 25 | 102 |

**Supplementary Table 9.** Comparison of cathode active material loading and areal capacity in ASSLMBs using Li metal and oxide electrolyte.

| Cell structure | Cathode active material loading (mg cm−2) | Discharge capacity (mAh g−1) | Areal capacity (mAh cm−2) | Total cycles (n)@current | Capacity decay rate per cycle (%) | Test temperature (℃) | Reference |
| --- | --- | --- | --- | --- | --- | --- | --- |
| LFP/Li6.4La3Zr1.4Ta0.6O12-MIS/Li | ~2.5 | 154.8 | ~0.39 | 250@0.2 C | 0.044 | 25 | 103 |
| LCO/BaTiO3-Li6.4La3Zr1.4Ta0.6O12/Li | 1.2 | 100.1 | 0.12 | 200@1.0 C | 0.086 | 65 | 104 |
| NCM811/Li1.5Al0.5Ti1.5(PO4)3/UVEA/Li | 7.4 | 146.9 | 1.09 | 400@0.2 C | 0.033 | 25 | 105 |
| NCM811/Li6.4La3Zr1.4Ta0.6O12/KF-Li | 2.5 | 178.2 | 0.45 | 300@0.2 C | 0.060 | 25 | 106 |
| LFP/Li6.5La3Zr1.5Ta0.5O12/LSF-Li | 1.5 | 136.1 | 0.2 | 200@1.0 C | 0.035 | / | 107 |
| NCM83/(LiCF3SO3+LiF)@Li6.5La3Zr1.5Ta0.5O12/Li | 5.88 | 165.4 | 0.97 | 300@2.35 mA cm−2 | 0.055 | 25 | 108 |
| NCM83/Li6.5La3Zr1.5Ta0.5O12/Ag@COOH-CNTs/Li | ~3.5 | 190 | ~0.67 | 500@0.2 C | 0.040 | 25 | 109 |
| NCM622/NBF-Li6.5La3Zr1.5Ta0.5O12/Li | 2.0 | 139.4 | 0.28 | 100@0.5 C | 0.056 | 25 | 110 |
| LFP/0.1Yb-Li6.5La3Zr1.5Ta0.5O12/Li | 2.0 | 150.7 | 0.30 | 300@0.5 C | 0.056 | 25 | 111 |
| NCM811/Li6.4La3Zr2Al0.2O12/GaP-Li | 2.0 | 146.2 | 0.29 | 100@0.5 C | 0.134 | 25 | 112 |
| LFP/Li6.4La3Zr1.4Ta0.6O12/GaP-Li | 3.7 | 143.1 | 0.53 | 100@0.5 C | 0.025 | 25 | 112 |
| LFP/Li6.4La3Zr1.4Ta0.6O12/Li2O-rich@Li | 1.7 | 112.4 | 0.19 | 600@1.0 C | 0.027 | 30 | 113 |
| NCM523/Li6.4La3Zr1.4Ta0.6O12/ZnF2-Li | 1.75 | 157.5 | 0.28 | 100@0.1 C | 0.190 | 25 | 114 |
| LFP/Li6.5La3Zr1.5Ta0.5O12/Li2S-LiSn/Li | 2.0 | 132.7 | 0.27 | 100@1.0 C | 0.002 | 25 | 115 |
| NCM811/(LiF-Li2PO3F)@Li6.4La3Zr1.4Ta0.6O12/Li | 3.0 | 175 | 0.53 | 400@0.5 C | 0.045 | 30 | 116 |
| LFP/Li6.4La3Zr1.4Ta0.6O12/InLix-LiCl/Li | 4 | 150.9 | 0.60 | 475@0.5 C | 0.005 | 25 | 117 |
| LFP/Ni-Li1.3Al0.3Ti1.7(PO4)3/Li | 1.7 | 158 | 0.27 | 200@0.5 C | 0.046 | 30 | 118 |
| NCM811/Li1.3Al0.3Ti1.7(PO4)3/LiCl-LixSn/Li | ~1.25 | 177.1 | ~0.24 | 100@0.5 C | 0.255 | 25 | 119 |
| LFP/Li1.3Al0.3Ti1.7(PO4)3/AlF3/Li | 1 | 162.5 | 0.16 | 300@0.1 C | 0.067 | 60 | 120 |
| LFP/Li1.3Al0.3Ti1.7(PO4)3/SE@KANF/Li | 2 | 159 | 0.32 | 180@0.1 C | 0.028 | 30 | 121 |
| LFP/LiCl@Li1.3Al0.3Ti1.7(PO4)3/Li | 2 | 103.6 | 0.21 | 500@1.0 C | 0.036 | 30 | 122 |
| NCM811/3D Li7La3Zr2O12-PAN/Li | 4.0 | 167.0 | 0.67 | 200@0.5 C | 0.050 | 30 | 123 |
| NCM811/AlF3-Li6.4La3Zr1.4Ta0.6O12-IL/LC10 | 2.8 | 180.3 | 0.50 | 100@0.2 C | 0.032 | 30 | 124 |

**Supplementary Table 10.** The cost of elements in HSEs and conventional cathode active materials.

| Element | Price ($ kg⁻1) | Year | Source |
| --- | --- | --- | --- |
| Lithium | 62.09 | 2025 | Shanghai Metals Market (Brand: Ganfeng, Tianqi, Jinkunlun, etc.) |
| Zirconium | 20.59 | 2025 | Shanghai Metals Market (Brand: Aohan, Donggao, etc.) |
| Tantalum | 322.75 | 2025 | Shanghai Metals Market (Brand: Ningxia Orient Tantalum Industry Co., Ltd; ZHUZHOU CEMENTED CARBIDE GROUP CO., LTD.) |
| Lanthanum | 2.67 | 2025 | Shanghai Metals Market |
| Titanium | 12.42 | 2025 | Shanghai Metals Market (Brand: BAOTI Shaanxi Tiancheng) |
| Indium | 311.51 | 2025 | Shanghai Metals Market (Brand: Huali, Huili, Hemao, Site, Jinkai, etc.) |
| Germanium | 1728.55 | 2025 | Shanghai Metals Market, (Brand: Yunnan Germanium, Chihong, Tongli, Mengdong, etc.) |
| Scandium | 3291.28 | 2025 | Shanghai Metals Market (Brand: Hunan Jinkun New Material) |
| Oxygen | 0.154 | 2001 | Hypertextbook |
| Chlorine | 0.082 | 2013 | China Agriculture Reports |
| Fluorine | 1.84 | 2017 | Wikipedia |
| Nickel | 14.708 | 2025 | Shanghai Metals Market (Brand: Norilsk) |
| Cobalt | 31.29 | 2025 | Shanghai Metals Market (Brand: Hanrui, GEM, Zhuzhou Cemented Carbide Group, etc.) |
| Manganese | 1.703 | 2025 | Shanghai Metals Market (Brand: Tianyuan Manganese Industry, CITIC Dameng, Wuling Manganese Industry, etc.) |

**Supplementary Table 11.** Comprehensive comparative analysis of cost, ionic conductivity, and Li-metal stability (evaluated by cumulative plating capacity) between LZC-10TF and currently typical HSEs.

| Electrolytes | Cost ($ kg⁻1) | Ionic conductivity  (mS cm⁻1) | Cumulative plating capacity (mAh cm⁻2) | Reference |
| --- | --- | --- | --- | --- |
| **LZC-10TF** | **8.67** | **2.9** | **1000** | **This work** |
| Li2ZrCl6 | 8.68 | 0.81 | 21.75 | 1 |
| Li1.75ZrCl4.75O0.5 | 8.86 | 2.42 | 10 | 27 |
| Li3InCl6 | 106.44 | 2.04 | 0.3 | 61 |
| Li3Ta3O4Cl10 | | 179.74 | 13.7 | 2.5 | 79 |
| Li3ScCl6 | 536.00 | 3.02 | 140 | 35 |
| Li0.388Ta0.238La0.475Cl3 | 65.34 | 3.02 | 500 | 53 |

**4. References for Supplementary Materials**

1. Wang, K. *et al.* A cost-effective and humidity-tolerant chloride solid electrolyte for lithium batteries. *Nat. Commun.* **12**, 4410 (2021).

2. He, X., Zhu, Y., Epstein, A. & Mo, Y. Statistical variances of diffusional properties from ab initio molecular dynamics simulations. *npj Comput. Mater.* **4**, 18 (2018).

3. Funke, H., Scheinost, A. C. & Chukalina, M. Wavelet analysis of extended x-ray absorption fine structure data. *Phys. Rev. B* **71**, 094110 (2005).

4. Ravel, B. & Newville, M. ATHENA, ARTEMIS, HEPHAESTUS: data analysis for X-ray absorption spectroscopy using IFEFFIT. *Synchrotron Radiat.* **12**, 537-541 (2005).

5. Zabinsky, S. I., Rehr, J. J., Ankudinov, A., Albers, R. C. & Eller, M. J. Multiple-scattering calculations of x-ray-absorption spectra. *Phys. Rev. B* **52**, 2995.

6. Mauler, L., Duffner, F., Zeier, W. G. & Leker, J. Battery cost forecasting: a review of methods and results with an outlook to 2050. *Energy Environ. Sci.* **14**, 4712–4739 (2021).

7. Asano, T. *et al.* Solid Halide Electrolytes with High Lithium‐Ion Conductivity for Application in 4 V Class Bulk‐Type All‐Solid‐State Batteries. *Adv. Mater.* **30**, 1803075 (2018).

8. Wang, C., Liang, J., Kim, J. T. & Sun, X. Prospects of halide-based all-solid-state batteries: From material design to practical application. *Sci. Adv.* **8**, eadc9516 (2022).

9. Schlem, R. *et al.* Mechanochemical Synthesis: A Tool to Tune Cation Site Disorder and Ionic Transport Properties of Li3MCl6 (M = Y, Er) Superionic Conductors. *Adv. Energy Mater.* **10**, 1903719 (2020).

10. Liang, J. *et al.* A Series of Ternary Metal Chloride Superionic Conductors for High‐Performance All‐Solid‐State Lithium Batteries. *Adv. Energy Mater.* **12**, 2103921 (2022).

11. Kim, S. Y. *et al.* Lithium Ytterbium-Based Halide Solid Electrolytes for High Voltage All-Solid-State Batteries. *ACS Materials Lett.* **3**, 930–938 (2021).

12. Li, X. *et al.* Structural regulation of halide superionic conductors for all-solid-state lithium batteries. *Nat. Commun.* **15**, 53 (2024).

13. Ganesan, P. *et al.* Fluorine-Substituted Halide Solid Electrolytes with Enhanced Stability toward the Lithium Metal. *ACS Appl. Mater. Interfaces* **15**, 38391–38402 (2023).

14. Kwak, H. *et al.* New Cost‐Effective Halide Solid Electrolytes for All‐Solid‐State Batteries: Mechanochemically Prepared Fe3+‐Substituted Li2ZrCl6. *Adv. Energy Mater.* **11**, 2003190 (2021).

15. Zhang, S. *et al.* Amorphous Oxyhalide Matters for Achieving Lithium Superionic Conduction. *J. Am. Chem. Soc.* **146**, 2977–2985 (2024).

16. Yu, S. *et al.* Design of a trigonal halide superionic conductor by regulating cation order-disorder. *Science* **382**, 573–579 (2023).

17. Tuo, K., Sun, C., López, C. A., Fernández-Díaz, M. T. & Alonso, J. A. New superionic halide solid electrolytes enabled by aliovalent substitution in Li3−*x*Y1−*x*Hf*x*Cl6 for all-solid-state lithium metal based batteries. *J. Mater. Chem. A* **11**, 15651–15662 (2023).

18. Kwak, H. *et al.* Boosting the interfacial superionic conduction of halide solid electrolytes for all-solid-state batteries. *Nat. Commun.* **14**, 2459 (2023).

19. Shao, Q. *et al.* New Insights into the Effects of Zr Substitution and Carbon Additive on Li3–*x*Er1–*x*Zr*x*Cl6 Halide Solid Electrolytes. *ACS Appl. Mater. Interfaces* **14**, 8095–8105 (2022).

20. Li, G. *et al.* One stone, three birds: Cu2+-substituted chloride electrolyte for high-performance all-solid-state lithium batteries. *Energy Storage Mater.* **71**, 103673 (2024).

21. Lei, P. *et al.* Boosting Ion Conduction and Moisture Stability Through Zn2+ Substitution of Chloride Electrolytes for All‐Solid‐State Lithium Batteries. *Adv. Energy Mater.* **15**, 2405760 (2025).

22. Gao, K.-N., Bai, F., Sun, Z. & Zhang, T. Aliovalent substitution of Al3+ in Li2ZrCl6 solid electrolyte towards large-scale application. *Energy Storage Mater.* **70**, 103444 (2024).

23. Liu, X., Zhou, Y., Mi, F., Ma, X. & Sun, C. Superionic halide solid electrolyte Li1.7Zr0.7Ta0.3Cl6 for durable all-solid-state lithium batteries. *Energy Storage Mater.* **72**, 103737 (2024).

24. Jia, Q. *et al.* Rare Earth Metal Ion‐Doped Halide Solid Electrolytes plus Ta5+ Substitution for Long Cycling All‐Solid‐State Batteries. *Adv. Funct. Mater.* **35**, 2426053 (2025).

25. Jin, H. *et al.* Regulating Chemical Bonds in Halide Frameworks for Lithium Superionic Conductors. *ACS Nano* **19**, 6399–6411 (2025).

26. Tang, M. *et al.* Li and Vacancy Co‐Enriched Halide Electrolytes via Non‐Equimolar Substitution for Stable All‐Solid‐State Lithium Batteries. *Adv. Energy Mater.* **15**, 2501255 (2025).

27. Hu, L. *et al.* A cost-effective, ionically conductive and compressible oxychloride solid-state electrolyte for stable all-solid-state lithium-based batteries. *Nat. Commun.* **14**, 3807 (2023).

28. Yu, T. *et al.* Superionic Fluorinated Halide Solid Electrolytes for Highly Stable Li‐Metal in All‐Solid‐State Li Batteries. *Adv. Energy Mater.* **11**, 2101915 (2021).

29. Hennequart, B. *et al.* Atmospheric-Pressure Operation of All-Solid-State Batteries Enabled by Halide Solid Electrolyte. *ACS Energy Lett.* **9**, 454–460 (2024.

30. Shi, X., Zeng, Z., Zhang, Q. & Du, Y. Rare-Earth Ions Regulating Lattice-Softened Bromide Solid Electrolytes for Highly Stable Fast-Charging Solid-State Batteries. *Nano Lett.* **25**, 7725–7731 (2025).

31. Ogbolu, B. O. *et al.* Tailoring Ion Transport in Li3‐3yHo1+yCl6‐xBr*x* via Transition‐Metal Free Structural Planes and Charge Carrier Distribution. *Adv. Sci.* **12**, 2409668 (2025).

32. Liu, Z. *et al.* High Ionic Conductivity Achieved in Li3Y(Br3Cl3) Mixed Halide Solid Electrolyte via Promoted Diffusion Pathways and Enhanced Grain Boundary. *ACS Energy Lett.* **6**, 298–304 (2021).

33. Wang, K., Gu, Z., Xi, Z., Hu, L. & Ma, C. Li3TiCl6 as ionic conductive and compressible positive electrode active material for all-solid-state lithium-based batteries. *Nat. Commun.* **14**, 1396 (2023).

34. Li, X. *et al.* Water‐mediated synthesis of a superionic halide solid electrolyte. *Angew. Chem. Int. Ed.* **131**, 16579-16584.

35. Liang, J. *et al.* Site-Occupation-Tuned Superionic Li*x*ScCl3+*x* Halide Solid Electrolytes for All-Solid-State Batteries. *J. Am. Chem. Soc.* **142**, 7012–7022 (2020).

36. Zhang, S. *et al.* Advanced High‐Voltage All‐Solid‐State Li‐Ion Batteries Enabled by a Dual‐Halogen Solid Electrolyte. *Adv. Energy Mater.* **11**, 2100836 (2021).

37. Li, R. *et al.* Superionic Conductivity Invoked by Enhanced Correlation Migration in Lithium Halides Solid Electrolytes. *ACS Energy Lett.* **9**, 1043–1052 (2024).

38. Wang, J., Chen, F., Hu, L. & Ma, C. Alternate Crystal Structure Achieving Ionic Conductivity above 1 mS cm–1 in Cost-Effective Zr-Based Chloride Solid Electrolytes. *Nano Lett.* **23**, 6081–6087 (2023).

39. Li, W. *et al.* High-voltage superionic and humidity-tolerant Li2.5Sc0.5Zr0.5Cl6 conductor for lithium batteries via preferred orientation. *Chem. Eng. J.* **455**, 140509 (2023).

40. Zhou, L. *et al.* High areal capacity, long cycle life 4 V ceramic all-solid-state Li-ion batteries enabled by chloride solid electrolytes. *Nat. Energy* **7**, 83–93 (2022).

41. Kwak, H. *et al.* Li+ conduction in aliovalent-substituted monoclinic Li2ZrCl6 for all-solid-state batteries: Li2+xZr1–xMxCl6 (M = In, Sc). *Chem. Eng. J.* **437**, 135413 (2022).

42. Li, X. *et al.* Origin of Superionic Li3Y1–*x*In*x*Cl6 Halide Solid Electrolytes with High Humidity Tolerance. *Nano Lett.* **20**, 4384–4392 (2020).

43. Ye, Y. *et al.* High-Voltage Long-Cycling All-Solid-State Lithium Batteries with High-Valent-Element-Doped Halide Electrolytes. *ACS Nano* **18**, 18368–18378 (2024).

44. Song, Z. *et al.* Promoting high-voltage stability through local lattice distortion of halide solid electrolytes. *Nat. Commun.* **15**, 1481 (2024).

45. Wang, Q. *et al.* Designing lithium halide solid electrolytes. *Nat. Commun.* **15**, 1050 (2024).

46. Ye, Y. *et al.* Advanced High-Entropy Halide Solid Electrolytes Enabling High-Voltage, Long-Cycling All-Solid-State Batteries. *Nano Lett.* **25**, 3747–3755 (2025).

47. Tong, Y. *et al.* Achieving an Ultrastable Halide‐Based All‐Solid‐State Lithium Battery via High‐Valent Doping‐Induced *s‐p‐d* Hybridization. *Adv. Funct. Mater.* **35**, 2502201 (2025).

48. Zhou, L. *et al.* Li3– *x*Zr*x*(Ho/Lu)1–*x*Cl6 Solid Electrolytes Enable Ultrahigh-Loading Solid-State Batteries with a Prelithiated Si Anode. *ACS Energy Lett.* **8**, 3102–3111 (2023).

49. Hu, L. *et al.* Revealing the Pnma crystal structure and ion-transport mechanism of the Li3YCl6 solid electrolyte. *Cell Rep. Phys. Sci.* **4**, 101428 (2023).

50. Park, J. *et al.* Heat treatment protocol for modulating ionic conductivity via structural evolution of Li3-xYb1-xMxCl6 (M = Hf4+, Zr4+) new halide superionic conductors for all-solid-state batteries. *Chem. Eng. J.* **425**, 130630 (2021).

51. Xu, G. *et al.* Origin of high electrochemical stability of multi-metal chloride solid electrolytes for high energy all-solid-state lithium-ion batteries. *Nano Energy* **92**, 106674 (2022).

52. Park, K.-H. *et al.* High-Voltage Superionic Halide Solid Electrolytes for All-Solid-State Li-Ion Batteries. *ACS Energy Lett.* **5**, 533–539 (2020).

53. Yin, Y.-C. *et al.* A LaCl3-based lithium superionic conductor compatible with lithium metal. *Nature* **616**, 77–83 (2023).

54. Zhang, S. *et al.* Cubic Iodide LixYI3+x Superionic Conductors through Defect Manipulation for All‐Solid‐State Li Batteries. *Angew. Chem. Int. Ed.* **136**, e202316360 (2024).

55. Tanibata, N. *et al.* Metastable Chloride Solid Electrolyte with High Formability for Rechargeable All-Solid-State Lithium Metal Batteries. *ACS Materials Lett.* **2**, 880–886 (2020).

56. Li, B., Xian, L., Peng, J. & Kong, L.-B. Improving the Stability of Li3HoBr6 on Metallic Lithium by Using a Double-Halogen Strategy. *ACS Appl. Energy Mater.* **7**, 3550–3557 (2024).

57. Luo, X. *et al.* Effective regulation towards electrochemical stability of superionic solid electrolyte via facile dual-halogen strategy. *Chem. Eng. J.* **465**, 143036 (2023).

58. Hu, J., Lei, M., Zhu, C., Zhang, B. & Li, C. Highly Conductive Doped Fluoride Solid Electrolytes with Solidified Ionic Liquid to Enable Reversible FeF3 Conversion Solid State Batteries. *Adv. Funct. Mater.* **34**, 2314044 (2024).

59. Ma, B. *et al.* Stable Oxyhalide‐Nitride Fast Ionic Conductors for All‐Solid‐State Li Metal Batteries. *Adv. Mater.* **36**, 2402324 (2024).

60. Ji, W., Zheng, D., Zhang, X., Ding, T. & Qu, D. A kinetically stable anode interface for Li3YCl6 -based all-solid-state lithium batteries. *J. Mater. Chem. A* **9**, 15012–15018 (2021).

61. Luo, J. *et al.* Rapidly In Situ Cross-Linked Poly(butylene oxide) Electrolyte Interface Enabling Halide-Based All-Solid-State Lithium Metal Batteries. *ACS Energy Lett.* **8**, 3676–3684 (2023).

62. Zhang, Y. & Sun, C. Composite Lithium Protective Layer Formed In Situ for Stable Lithium Metal Batteries. *ACS Appl. Mater. Interfaces* **13**, 12099–12105 (2021).

63. Xu, X. *et al.* Stabilizing the Halide Solid Electrolyte to Lithium by a β-Li3N Interfacial Layer. *ACS Appl. Mater. Interfaces* **14**, 39951–39958 (2022).

64. Zheng, X. *et al.* Li3InCl6-coated LiCoO2 for high-performance all solid-state batteries. *Appl. Phys. Lett.* **121**, 033902 (2022).

65. Xu, S. *et al.* Performance Enhancement of the Li6PS5Cl‐Based Solid‐State Batteries by Scavenging Lithium Dendrites with LaCl3‐Based Electrolyte. *Adv. Mater.* **36**, 2310356 (2024).

66. Zhou, Y. *et al.* LiPON-enabled interfacial engineering: stabilizing lithium metal anodes in halide all‐solid‐state lithium batteries. *Appl. Surf. Sci.* **720**, 165292 (2026).

67. Ren, W. *et al.* Promoting Ion Conduction and Li Metal Compatibility Through Nb5+‐Substituted Zirconium‐Based Chlorides for All‐Solid‐State Batteries. *Interdiscip. Mater.* **4**, 914–926 (2025).

68. Wang, Z. *et al.* Interlayer Design for Halide Electrolytes in All‐Solid‐State Lithium Metal Batteries. *Adv. Mater.* **37**, 2501838 (2025).

69. Wang, S. *et al.* An Iodide-Chloride Solid Electrolyte Compatible with Lithium Metal for All-Solid-State Lithium Batteries. *ACS Appl. Mater. Interfaces*, **17**, 44430-44439 (2025).

70. Liu, F. *et al.* Li−Ag alloy anode with interfacial silver layer for all−solid−state lithium metal batteries utilizing Li3InCl6 halide solid electrolyte. *J. Power Sources* **647**, 237357 (2025).

71. Zhang, G. *et al.* Stabilizing Halide Electrolytes against Lithium Metal with a Self-Limiting Layer for All-Solid-State Lithium Metal Batteries. *ACS Nano* **19**, 14839–14847 (2025).

72. Nie, X., Lei, M., Hu, J. & Li, C. Cost-Effective and Humid Air-Stable Fluoride Solid Electrolyte with High Ionic Conductivity Induced by Microstructural Modulation. *ACS Materials Lett.* **7**, 1768–1776 (2025).

73. Liu, H. *et al.* Fluorinated coating stabilizing halide solid electrolytes for all-solid-state lithium metal batteries. *Energy Storage Mater.* **75**, 104107 (2025).

74. Sun, T., Wang, Q., Liao, J. & Wang, S. Rational design for the potential substitute of sulfide in halide-based all solid-state lithium metal batteries. *J. Colloid Interface Sci.* **679**, 798–808 (2025).

75. Hu, J. *et al.* Aliovalent sulfur-substitution regulated highly amorphous Li2ZrCl6 solid electrolytes for all-solid-state lithium metal batteries. *J. Energy Chem.* **111**, 67–78 (2025).

76. Nie, X. *et al.* Humid‐Air Stable and High‐conductivity Fluoride Solid Electrolytes Induced by Liquid Metal Activation and Ga2O3 in situ Catalysis. *Adv. Energy Mater.* **15**, 2402997 (2025).

77. Yan, J. *et al.* Wet chemical synthesis of dianion-doped halide solid-state electrolytes for improved interface stability. *J. Power Sources* **633**, 236424 (2025).

78. Lannelongue, P. *et al.* Stable cycling of halide solid state electrolyte enabled by a dynamic layered solid electrolyte interphase between Li metal and Li3YCl4Br2. *Energy Storage Mater.* **72**, 103733 (2024).

79. Zhao, F. *et al.* Anion sublattice design enables superionic conductivity in crystalline oxyhalides. *Science* **390**, 199-204 (2025).

80. Li, W. *et al.* Precise Tailoring of Lithium‐Ion Transport for Ultralong‐Cycling Dendrite‐Free All‐Solid‐State Lithium Metal Batteries. *Adv. Mater.* **36**, 2302647 (2024).

81. Liu, Y. *et al.* Inhibiting Dendrites by Uniformizing Microstructure of Superionic Lithium Argyrodites for All‐Solid‐State Lithium Metal Batteries. *Adv. Energy Mater.* **14**, 2400783 (2024).

82. Shi, Y. *et al.* An optimizing hybrid interface architecture for unleashing the potential of sulfide-based all-solid-state battery. *Energy Storage Mater.* **63**, 103009 (2023).

83. Shi, Y. *et al.* A tailored dual-layer electronic shielding interface enables highly stable and dendrite-free solid-state lithium metal batteries. *Nano Energy* **120**, 109150 (2024).

84. Braks, L. *et al.* Interfacial Stabilization by Prelithiated Trithiocyanuric Acid as an Organic Additive in Sulfide‐Based All‐Solid‐State Lithium Metal Batteries. *Angew. Chem. Int. Ed.* **63**, e202408238 (2024).

85. Liang, Y. *et al.* Tailoring Conversion‐Reaction‐Induced Alloy Interlayer for Dendrite‐Free Sulfide‐Based All‐Solid‐State Lithium‐Metal Battery. *Adv. Sci.* **10**, 2300985 (2023).

86. Li, S. *et al.* A Dynamically Stable Mixed Conducting Interphase for All‐Solid‐State Lithium Metal Batteries. *Adv. Mater.* **36**, 2307768 (2024).

87. Wei, C. *et al.* SnF2‐Induced Multifunctional Interface‐Stabilized Li5.5PS4.5Cl1.5‐Based All‐Solid‐State Lithium Metal Batteries. *Adv. Funct. Mater.* **34**, 2314306 (2024).

88. Wang, Z. *et al.* Lithium anode interlayer design for all-solid-state lithium-metal batteries. *Nat. Energy* **9**, 251–262 (2024).

89. Liu, C. *et al.* Electron Redistribution Enables Redox‐Resistible Li6PS5Cl towards High‐Performance All‐Solid‐State Lithium Batteries. *Angew. Chem. Int. Ed.* **62**, e202302655 (2023).

90. Xiong, B. *et al.* Long‐Life All‐Solid‐State Batteries Enabled by Cold‐Pressed Garnet Composite Electrolytes with Enhanced Li+ Conduction. *Angew. Chem. Int. Ed.* **137**, e202413502 (2024).

91. Liu, H. *et al.* Generalized Interphase Design for Stabilized Li/Inorganic Electrolyte Interfaces. *Adv. Energy Mater.* **14**, 2402064 (2024).

92. Duan, H. *et al.* In Situ Constructed 3D Lithium Anodes for Long‐Cycling All‐Solid‐State Batteries. *Adv. Energy Mater.* **13**, 2300815 (2023).

93. Jiang, Z. *et al.* Insights on Bi-O dual-doped Li5.5PS4.5Cl1.5 electrolyte with enhanced electrochemical properties for all-solid-state lithium metal batteries. *Nano Energy* **128**, 109926 (2024).

94. Hao, X. *et al.* Regulating Ion Diffusion and Stability in Amorphous Thiosilicate‐Based Solid Electrolytes Through Edge‐Sharing Local Structures. *Adv. Energy Mater.* **14**, 2304556 (2024).

95. Wang, C. *et al.* Enhanced Air Stability and Li Metal Compatibility of Li‐Argyrodite Electrolytes Triggered by In2O3 Co‐Doping for All‐Solid‐State Li Metal Batteries. *Adv. Funct. Mater.* **34**, 2313308 (2024).

96. Park, S. H., Hwang, Y. Y., Park, I., Park, H. B. & Lee, Y. J. Mechano-chemical solution process for Li3PS4 solid electrolyte using dibromomethane for enhanced conductivity and cyclability in all-solid-state batteries. *Energy Storage Mater.* **63**, 102985 (2023).

97. Liu, H. *et al.* High Air Stability and Excellent Li Metal Compatibility of Argyrodite‐Based Electrolyte Enabling Superior All‐Solid‐State Li Metal Batteries. *Adv. Funct. Mater.* **32**, 2203858 (2022).

98. Ni, Y., Huang, C., Liu, H., Liang, Y. & Fan, L. A High Air‐Stability and Li‐Metal‐Compatible Li3+2*x*P1−*x*Bi*x*S4−1.5xO1.5*x* Sulfide Electrolyte for All‐Solid‐State Li–Metal Batteries. *Adv. Funct. Mater.* **32**, 2205998 (2022).

99. Su, H. *et al.* Stabilizing the interphase between Li and Argyrodite electrolyte through synergistic phosphating process for all-solid-state lithium batteries. *Nano Energy* **96**, 107104 (2022).

100. Liu, Y. *et al.* Ultrafast Synthesis of I‐Rich Lithium Argyrodite Glass–Ceramic Electrolyte with High Ionic Conductivity. *Adv. Mater.* **34**, 2107346 (2022).

101. Su, H. *et al.* Deciphering the critical role of interstitial volume in glassy sulfide superionic conductors. *Nat. Commun.* **15**, 2552 (2024).

102. Li, Y. *et al.* Engineering high-performance argyrodite sulfide electrolytes via metal halide doping for all-solid-state lithium metal batteries. *Energy Storage Mater.* **77**, 104221 (2025).

103. Hu, X. *et al.* A Lithium Intrusion‐Blocking Interfacial Shield for Wide‐Pressure‐Range Solid‐State Lithium Metal Batteries. *Adv. Mater.* **36**, 2308275 (2024).

104. Xiong, B.-Q. *et al.* Field-responsive grain boundary against dendrite penetration for all-solid-state batteries. *Energy Environ. Sci.* **17**, 6707–6716 (2024).

105. Zou, P., Wang, C., He, Y. & Xin, H. L. Broadening solid ionic conductor selection for sustainable and earth-abundant solid-state lithium metal batteries. *Energy Environ. Sci.* **16**, 5871–5880 (2023).

106. Zhang, C. *et al.* An electron-blocking interface for garnet-based quasi-solid-state lithium-metal batteries to improve lifespan. *Nat. Commun.* **15**, 5325 (2024).

107. Zhu, F. *et al.* Harmonized Interphase Refinement for Robust Garnet Solid‐State Batteries. *Adv. Funct. Mater.* **34**, 2411737 (2024).

108. Ji, W. *et al.* Interface engineering enabling thin lithium metal electrodes down to 0.78 μm for garnet-type solid-state batteries. *Nat. Commun.* **15**, 9920 (2024).

109. Huang, H. *et al.* Bonded Interface Enabled Durable Solid‐state Lithium Metal Batteries with Ultra‐low Interfacial Resistance of 0.25 Ω cm2. *Adv. Funct. Mater.* **34**, 2407619 (2024).

110. Wang, L. *et al.* In Situ Construction of a Lithiophilic and Electronically Insulating Multifunctional Hybrid Layer Based on the Principle of Hydrolysis for a Stable Garnet/Li Interface. *Adv. Funct. Mater.* **34**, 2402971 (2024).

111. Lu, F. *et al.* Microstructural engineering for Ta-doped Li-garnet solid electrolyte toward enhancing performance. *Energy Storage Mater.* **65**, 103101 (2024).

112. Li, Z. *et al.* Superionic Conductor Enabled Composite Lithium with High Ionic Conductivity and Interfacial Wettability for Solid‐State Lithium Batteries. *Adv. Funct. Mater.* **34**, 2309751 (2024).

113. Jiang, H. *et al.* Regulation Mechanism on A Bilayer Li2O‐Rich Interface between Lithium Metal and Garnet‐Type Solid Electrolytes. *Adv. Funct. Mater.* **34**, 2306399 (2024).

114. Zhang, L. *et al.* Ion/electron conductive layer with double-layer-like structure for dendrite-free solid-state lithium metal batteries. *Nano Energy* **113**, 108573 (2023).

115. Zhu, F. *et al.* In-situ construction of multifunctional interlayer enabled dendrite-free garnet-based solid-state batteries. *Nano Energy* **111**, 108416 (2023).

116. Yang, X. *et al.* From Contaminated to Highly Lithiated Interfaces: A Versatile Modification Strategy for Garnet Solid Electrolytes. *Adv. Funct. Mater.* **33**, 2209120 (2023).

117. Leng, J. *et al.* A facile and low-cost wet-chemistry artificial interface engineering for garnet-based solid-state Li metal batteries. *Nano Energy* **101**, 107603 (2022).

118. Zhou, Q. *et al.* Atomic welding enhancing the electromechanical performance of Li1.3Al0.3Ti1.7(PO4)3 (LATP) solid electrolyte. *Energy Storage Mater.* **74**, 103932 (2025).

119. Ding, D., Tao, H., Fan, X., Yang, X. & Fan, L. A Hybrid LiCl/Li*x*Sn Conductive Interlayer to Unlock the Potential of Solid‐State Lithium Metal Batteries. *Adv. Funct. Mater.* **34**, 2401457 (2024).

120. Gu, Y., Hu, J., Lai, C. & Li, C. NASICON‐Based Solid State Li‐Fluoride Conversion Batteries Enabled by Constructing a Fluorine‐Rich Trap for Ti4+. *Adv. Energy Mater.* **13**, 2203679 (2023).

121. Kong, W. *et al.* Stabilizing Li1.3Al0.3Ti1.7(PO4)3|Li Metal Anode Interface in Solid‐State Batteries by Kevlar Aramid Nanofiber‐Based Protective Coating. *Adv. Funct. Mater.* **33**, 2306748. (2023).

122. Luo, L. *et al.* Insights into the Enhanced Interfacial Stability Enabled by Electronic Conductor Layers in Solid‐State Li Batteries. *Adv. Energy Mater.* **13**, 2203517 (2023).

123. Zhao, X. *et al.* Addressing the interface issues of all‐solid‐state lithium batteries by ultra‐thin composite solid‐state electrolyte combined with the integrated preparation technology. *InfoMat* **7**, e70012 (2025).

124. Wu, J. *et al.* Deciphering Solid‐State Battery Interface Failure: Plasma‐Assisted Bulk‐Interface Lithium Diffusion Kinetics Regulation. *Adv. Funct. Mater.* e21740 (2025).
